# Supplementary material for: Synthesis of Oxadiazole-Thiadiazole Hybrids and Their Anticandidal Activity
Source: MDPI journal article supplement (doi:10.3390/molecules22112004), 2017-11-18
Supplement: s1 [file s1]

# **Supporting Information**

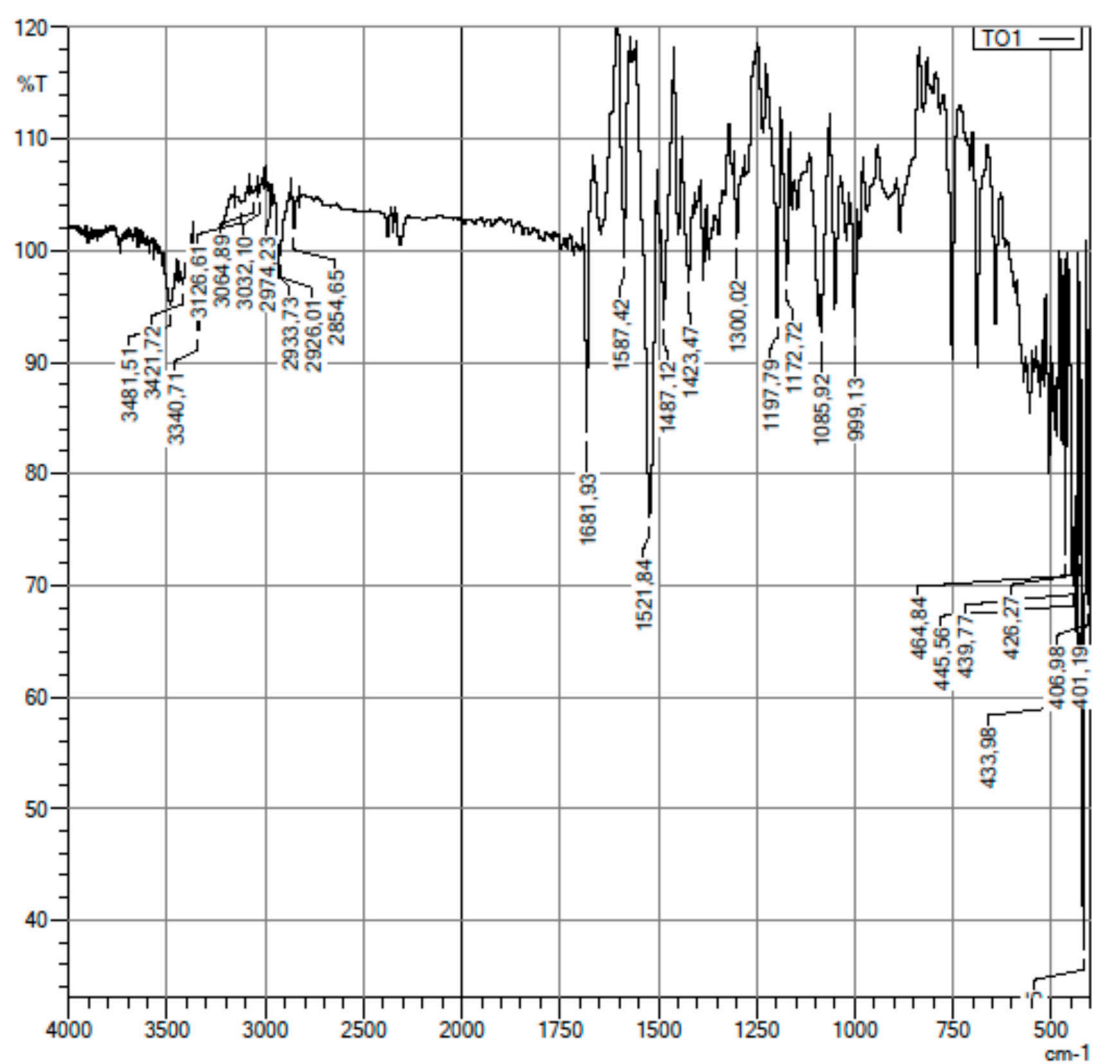

C:\Users\dopnalab\Desktop\BET7L\TOWTO1.ispd

|   | Item           | Value          |
|---|----------------|----------------|
| 2 | Sample name    | TO-1           |
| 3 | Sample ID      |                |
| 4 | Option         |                |
| 5 | Intensity Mode | %Transmittance |
| 6 | Apodization    | Happ-Genzel    |
| 9 | No. of Scans   | 10             |

Figure 1. Compound 6a IR spectrum

Data File: C:\LabSolutions\Data\Analiz\BKaya\TO1\_1.lod

| Elmt | Val | Min | Max | Elmt | Val | Min | Max | Elmt | Val | Min | Max | Use Adduct |
|------|-----|-----|-----|------|-----|-----|-----|------|-----|-----|-----|------------|
| H    | 1   | 10  | 40  | O    | 2   | 2   | 5   | Cl   | 1   | 0   | 0   | H          |
| C    | 4   | 10  | 26  | F    | 1   | 0   | 0   | Br   | 1   | 0   | 0   |            |
| N    | 3   | 5   | 5   | S    | 2   | 3   | 3   |      |     |     |     |            |

Error Margin (ppm): 5  
 HC Ratio: unlimited  
 Max Isotopes: 3  
 MSn Iso RI (%): 10.00

DBE Range: 0.0 - 19.0  
 Apply N Rule: yes  
 Isotope RI (%): 1.00  
 MSn Logic Mode: AND

Electron Ions: both  
 Use MSn Info: no  
 Isotope Res: 10000  
 Max Results: 500

Event#: 1 MS(E+) Ret. Time : 7.973 -&gt; 8.080 Scan#: 1197 -&gt; 1213

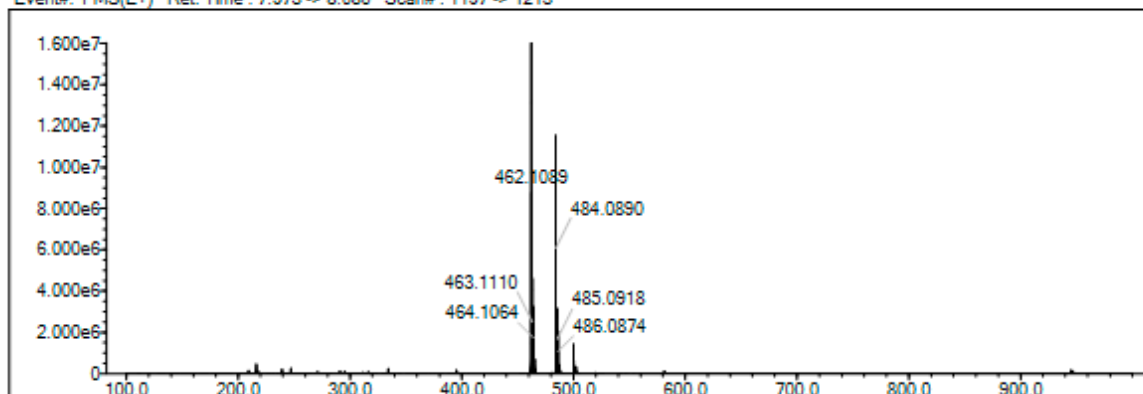

Measured region for 462.1089 m/z

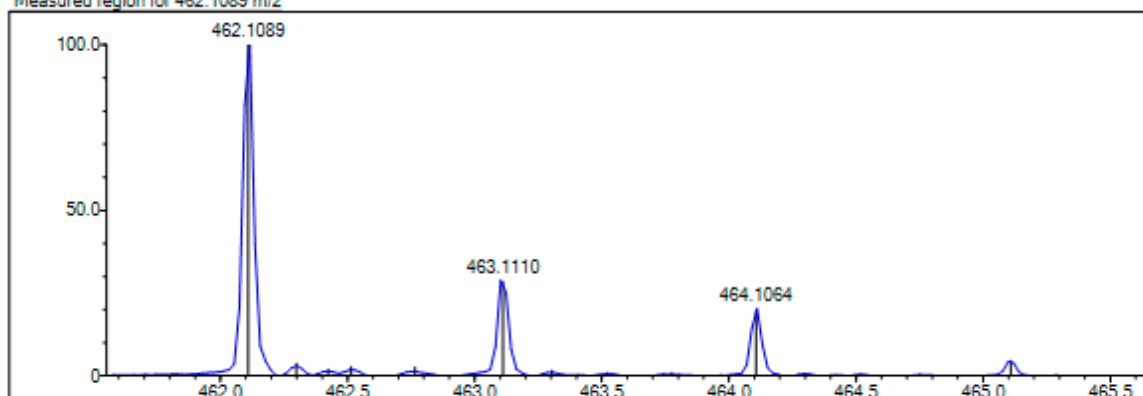C20 H23 N5 O2 S3 [M+H]<sup>+</sup> : Predicted region for 462.1087 m/z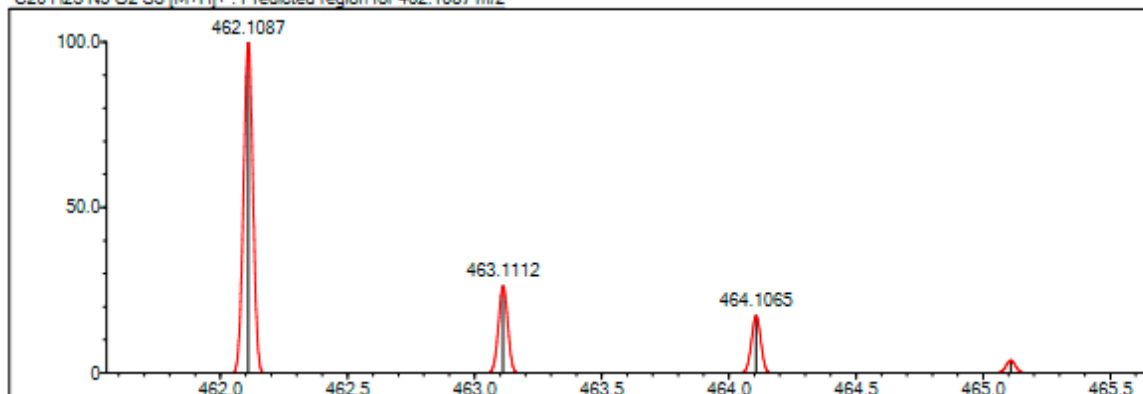

| Rank | Score | Formula (M)      | Ion                | Meas. m/z | Pred. m/z | Df. (mDa) | Df. (ppm) | Iso   | DBE  |
|------|-------|------------------|--------------------|-----------|-----------|-----------|-----------|-------|------|
| 1    | 91.98 | C20 H23 N5 O2 S3 | [M+H] <sup>+</sup> | 462.1089  | 462.1087  | 0.2       | 0.43      | 91.98 | 12.0 |

Figure 2. Compound 6a Mass spectrum

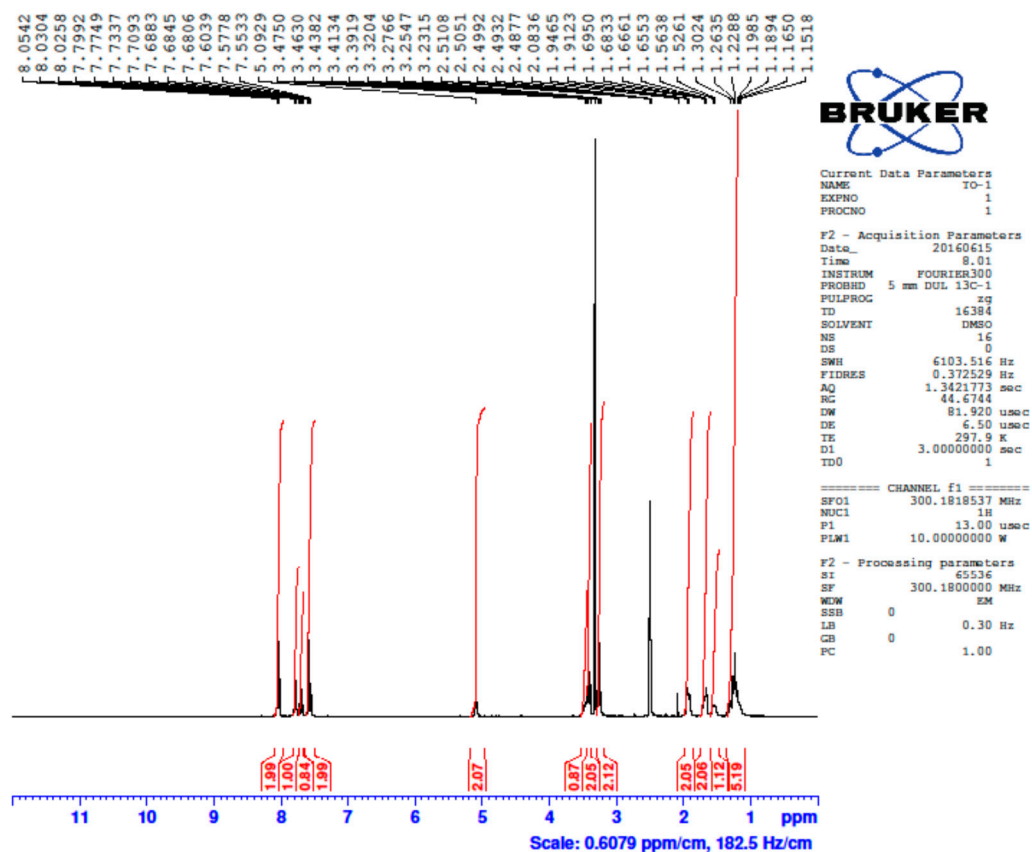

Figure 3. Compound 6a  $^1\text{H}$  NMR spectrum

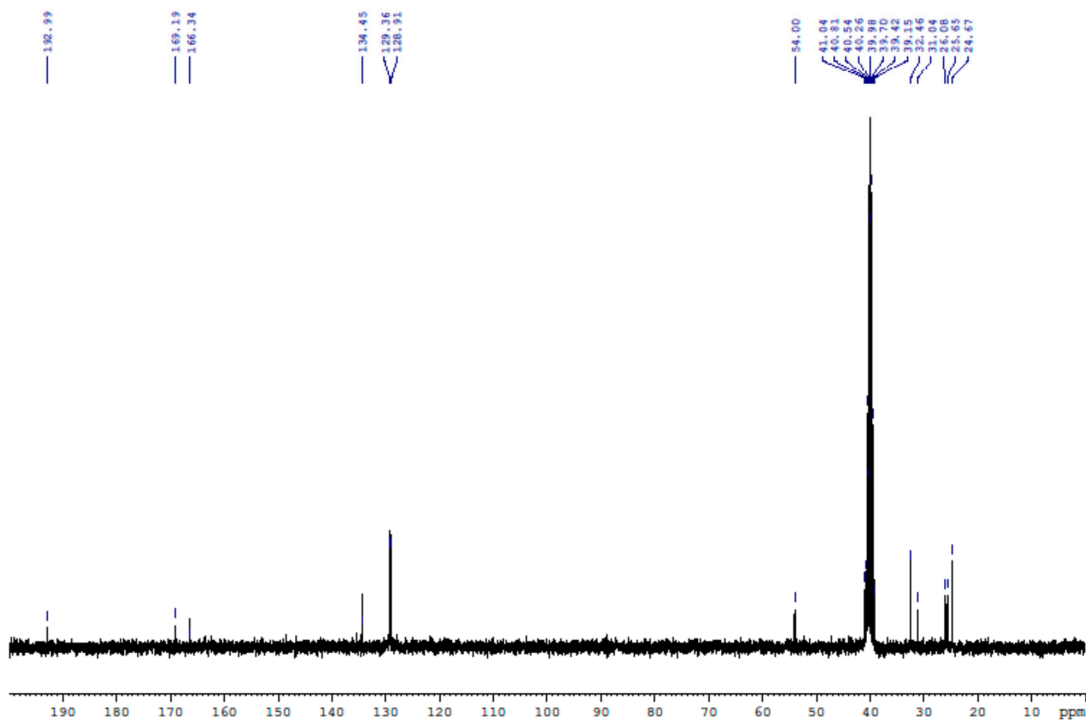

Figure 4. Compound 6a  $^{13}\text{C}$  NMR spectrum

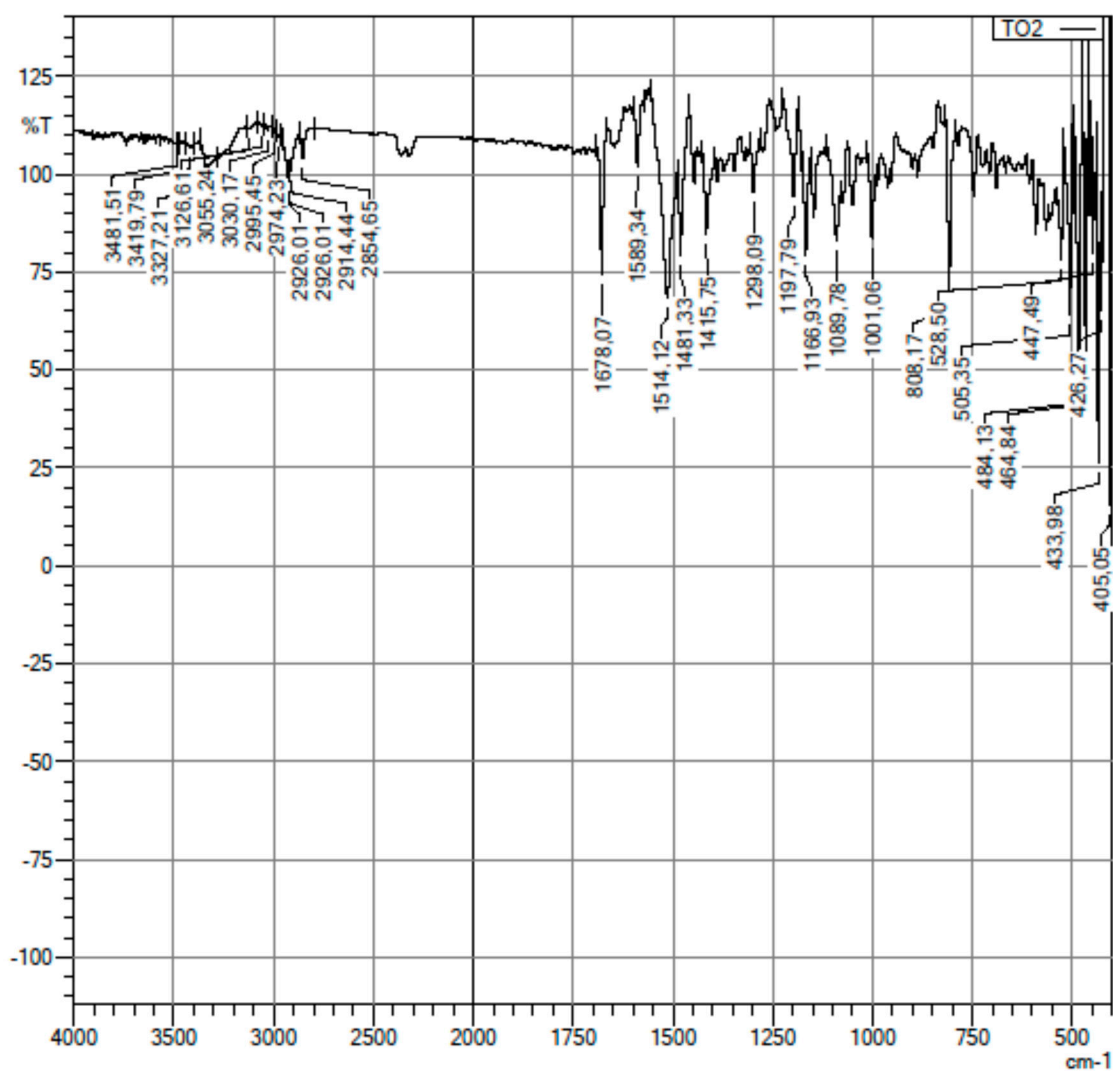

C:\Users\dopnalab\Desktop\BET9\LT\TO\TO2.ispd

|   | Item           | Value           |
|---|----------------|-----------------|
| 2 | Sample name    | TO-2            |
| 3 | Sample ID      |                 |
| 4 | Option         |                 |
| 5 | Intensity Mode | % Transmittance |
| 6 | Apodization    | Happ-Genzel     |
| 9 | No. of Scans   | 10              |

Figure 5. Compound 6b IR spectrum

Data File: C:\LabSolutions\Data\Analiz\BKaya\TO2\_2.lcd

| Elmt | Val. | Min | Max | Elmt | Val. | Min | Max | Elmt | Val. | Min | Max | Use Adduct |
|------|------|-----|-----|------|------|-----|-----|------|------|-----|-----|------------|
| H    | 1    | 10  | 40  | O    | 2    | 2   | 5   | Cl   | 1    | 0   | 0   | H          |
| C    | 4    | 10  | 26  | F    | 1    | 0   | 0   | Br   | 1    | 0   | 0   |            |
| N    | 3    | 5   | 5   | S    | 2    | 3   | 3   |      |      |     |     |            |

Error Margin (ppm): 5

HC Ratio: unlimited

Max Isotopes: 3

MSn Iso RI (%): 10.00

DBE Range: 0.0 - 19.0

Apply N Rule: yes

Isotope RI (%): 1.00

MSn Logic Mode: AND

Electron Ions: both

Use MSn Info: no

Isotope Res: 10000

Max Results: 500

Event#: 1 MS(E+) Ret. Time : 8.000 -&gt; 8.080 Scan#: 1201 -&gt; 1213

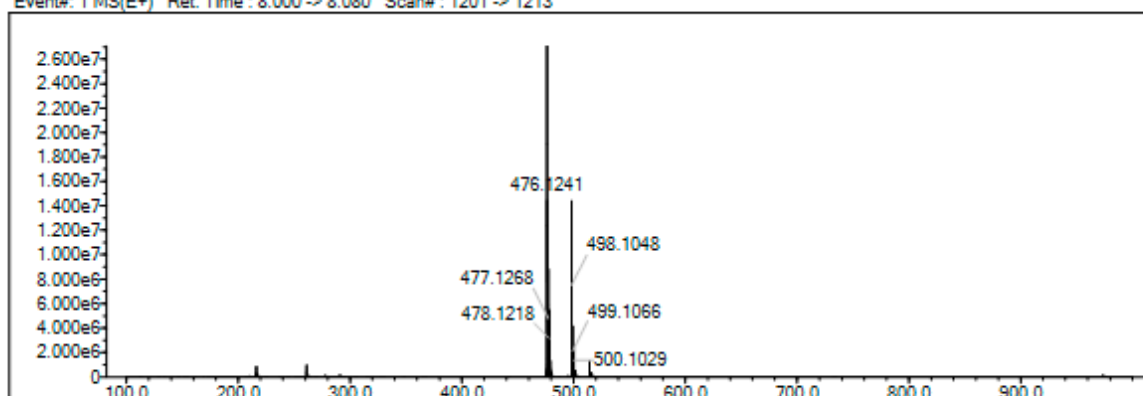

Measured region for 476.1241 m/z

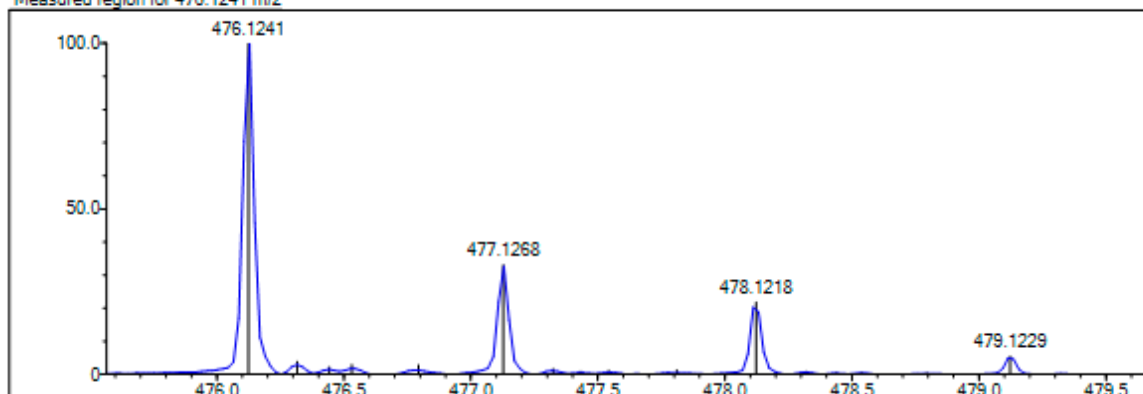

C21 H25 N5 O2 S3 [M+H]+ : Predicted region for 476.1243 m/z

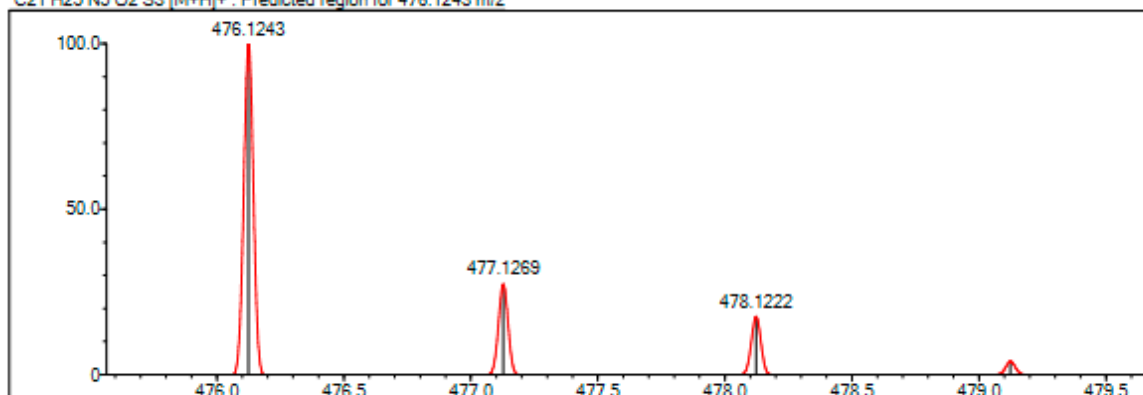

| Rank | Score | Formula (M)      | Ion    | Meas. m/z | Pred. m/z | Df. (mDa) | Df. (ppm) | Iso   | DBE  |
|------|-------|------------------|--------|-----------|-----------|-----------|-----------|-------|------|
| 1    | 89.12 | C21 H25 N5 O2 S3 | [M+H]+ | 476.1241  | 476.1243  | -0.2      | -0.42     | 89.12 | 12.0 |

Figure 6. Compound 6b Mass spectrum

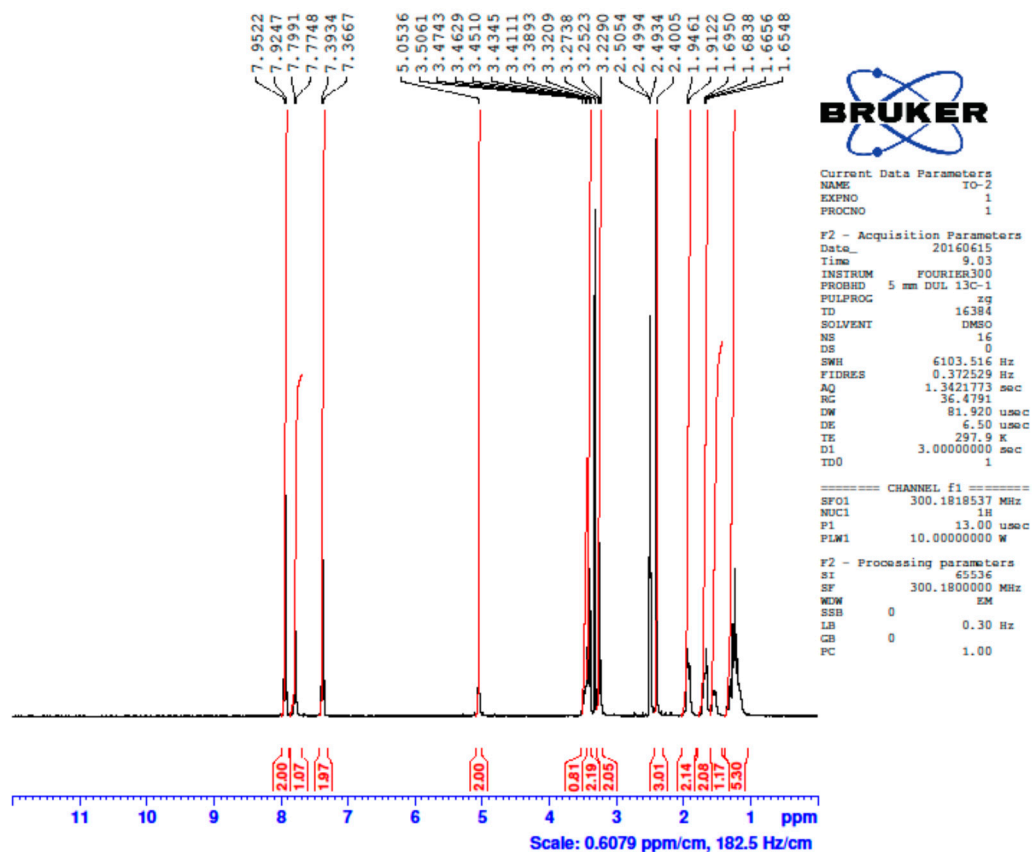

Figure 7. Compound 6b <sup>1</sup>H NMR spectrum

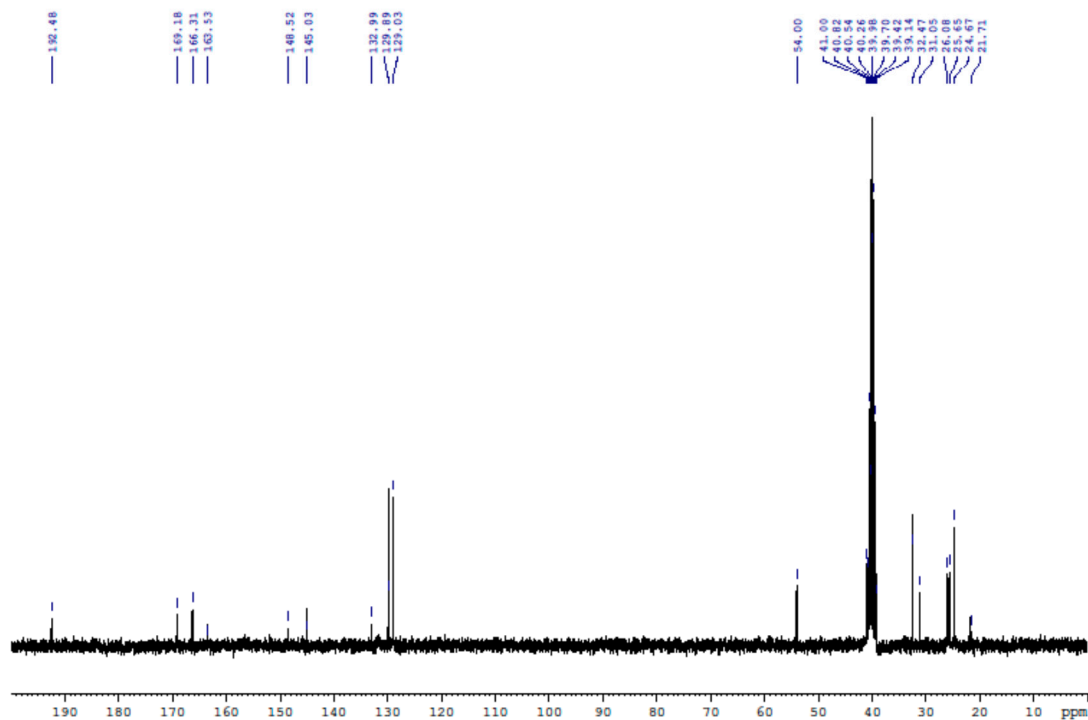

Figure 8. Compound 6b <sup>13</sup>C NMR spectrum

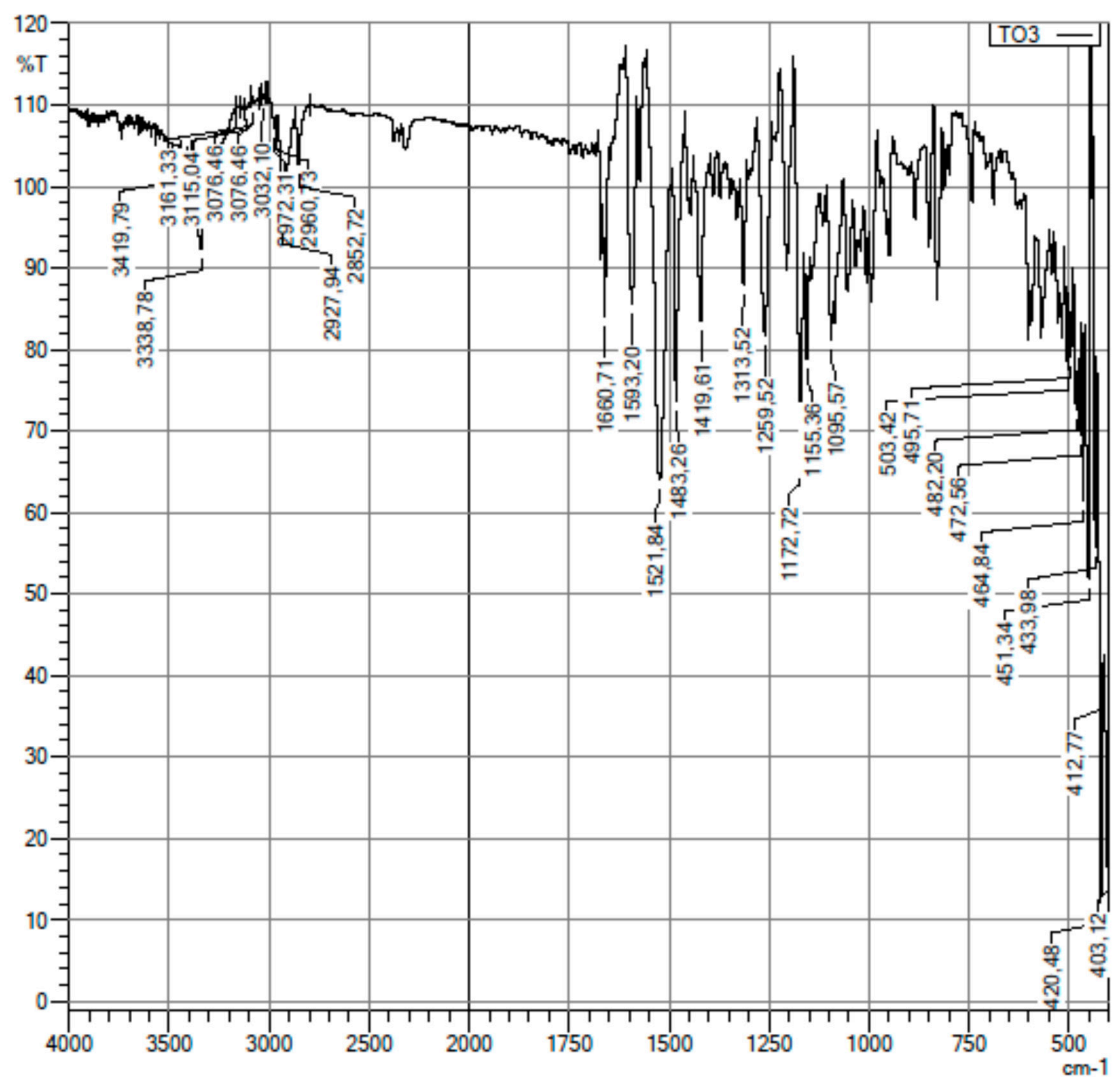

C:\Users\dopnalab\Desktop\BET9\LT\TO\TO3.ispd

|   | Item           | Value           |
|---|----------------|-----------------|
| 2 | Sample name    | TO-3            |
| 3 | Sample ID      |                 |
| 4 | Option         |                 |
| 5 | Intensity Mode | % Transmittance |
| 6 | Apodization    | Happ-Genzel     |
| 9 | No. of Scans   | 10              |

Figure 9. Compound 6c IR spectrum



Data File: C:\LabSolutions\Data\Analiz\BKaya\TO3-1\_3.lcd

| Elmt | Val | Min | Max | Elmt | Val | Min | Max | Elmt | Val | Min | Max | Use Adduct |
|------|-----|-----|-----|------|-----|-----|-----|------|-----|-----|-----|------------|
| H    | 1   | 10  | 40  | O    | 2   | 2   | 5   | Cl   | 1   | 0   | 0   | H          |
| C    | 4   | 10  | 26  | F    | 1   | 0   | 0   | Br   | 1   | 0   | 0   |            |
| N    | 3   | 5   | 5   | S    | 2   | 3   | 3   |      |     |     |     |            |

Error Margin (ppm): 5  
 DBE Range: 0.0 - 19.0  
 Electron Ions: both  
 HC Ratio: unlimited  
 Apply N Rule: yes  
 Use MSn Info: no  
 Max Isotopes: 3  
 Isotope RI (%): 1.00  
 Isotope Res: 10000  
 MSn Iso RI (%): 10.00  
 MSn Logic Mode: AND  
 Max Results: 500

Event#: 1 MS(E+) Ret. Time : 7.800 -> 7.853 Scan#: 1171 -> 1179

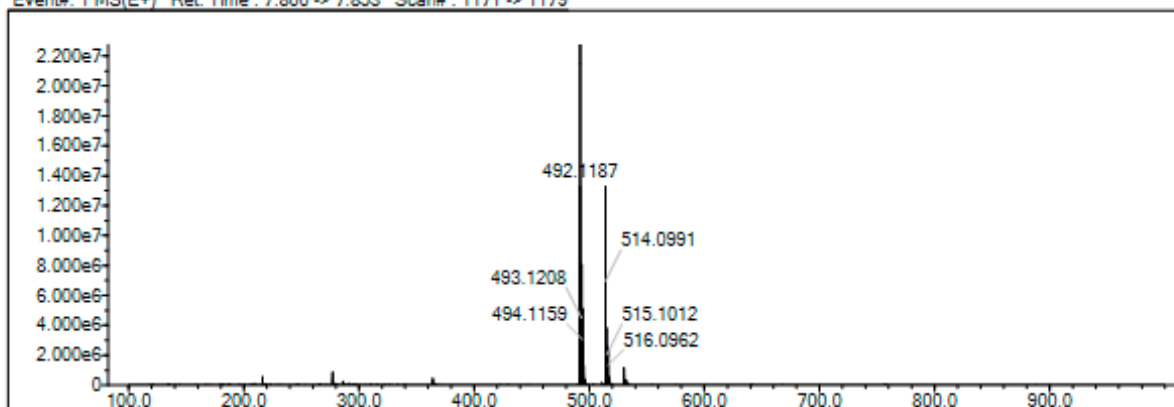

Measured region for 492.1187 m/z

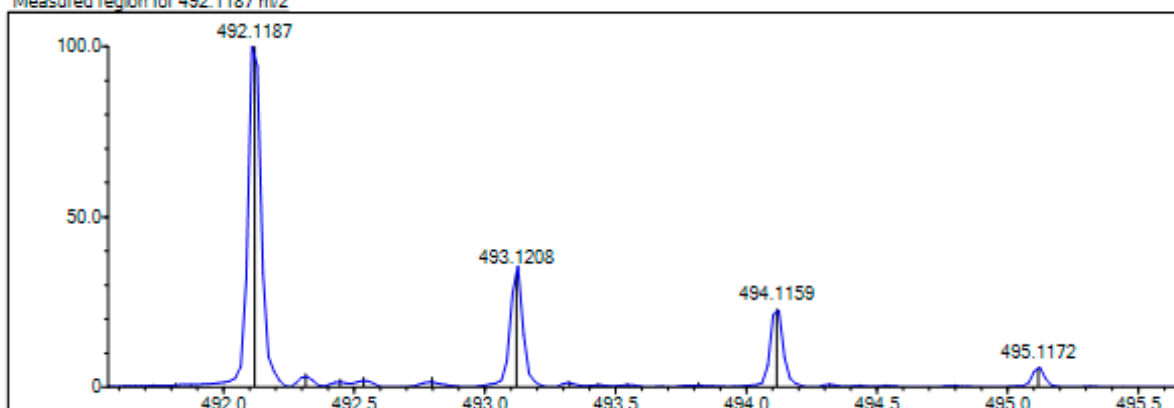

C21 H25 N5 O3 S3 [M+H]<sup>+</sup> : Predicted region for 492.1192 m/z

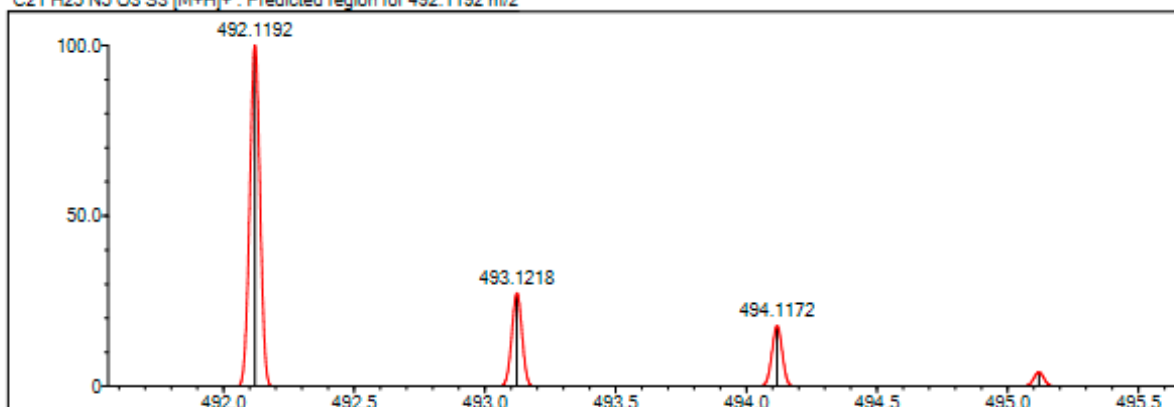

| Rank | Score | Formula (M)      | Ion                | Meas. m/z | Pred. m/z | Df. (mDa) | Df. (ppm) | Iso   | DBE  |
|------|-------|------------------|--------------------|-----------|-----------|-----------|-----------|-------|------|
| 1    | 83.33 | C21 H25 N5 O3 S3 | [M+H] <sup>+</sup> | 492.1187  | 492.1192  | -0.5      | -1.02     | 83.37 | 12.0 |

Figure 10. Compound 6c Mass spectrum

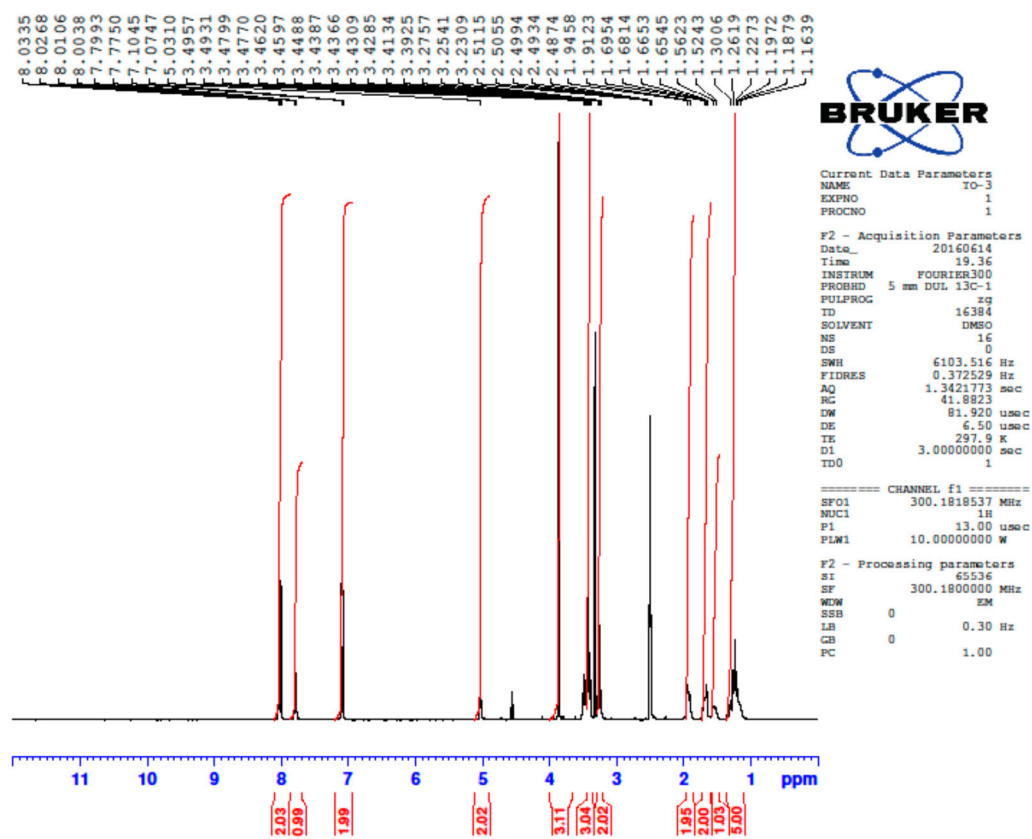

Figure 11. Compound 6c <sup>1</sup>H NMR spectrum

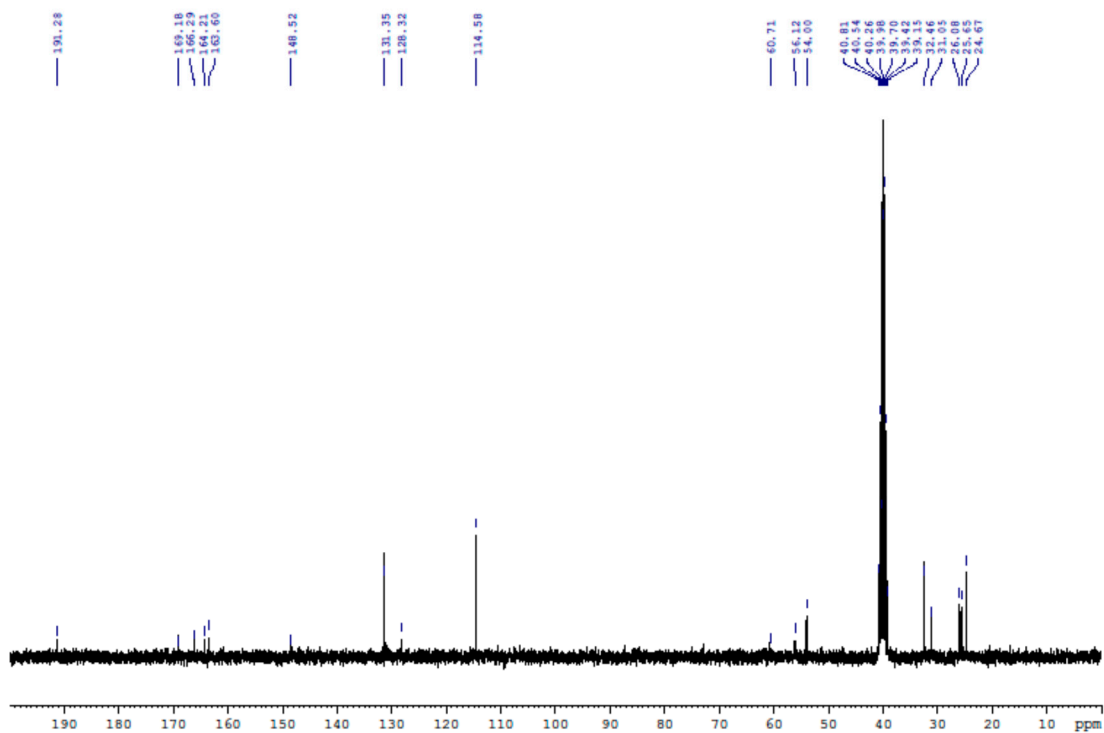

Figure 12. Compound 6c <sup>13</sup>C NMR spectrum

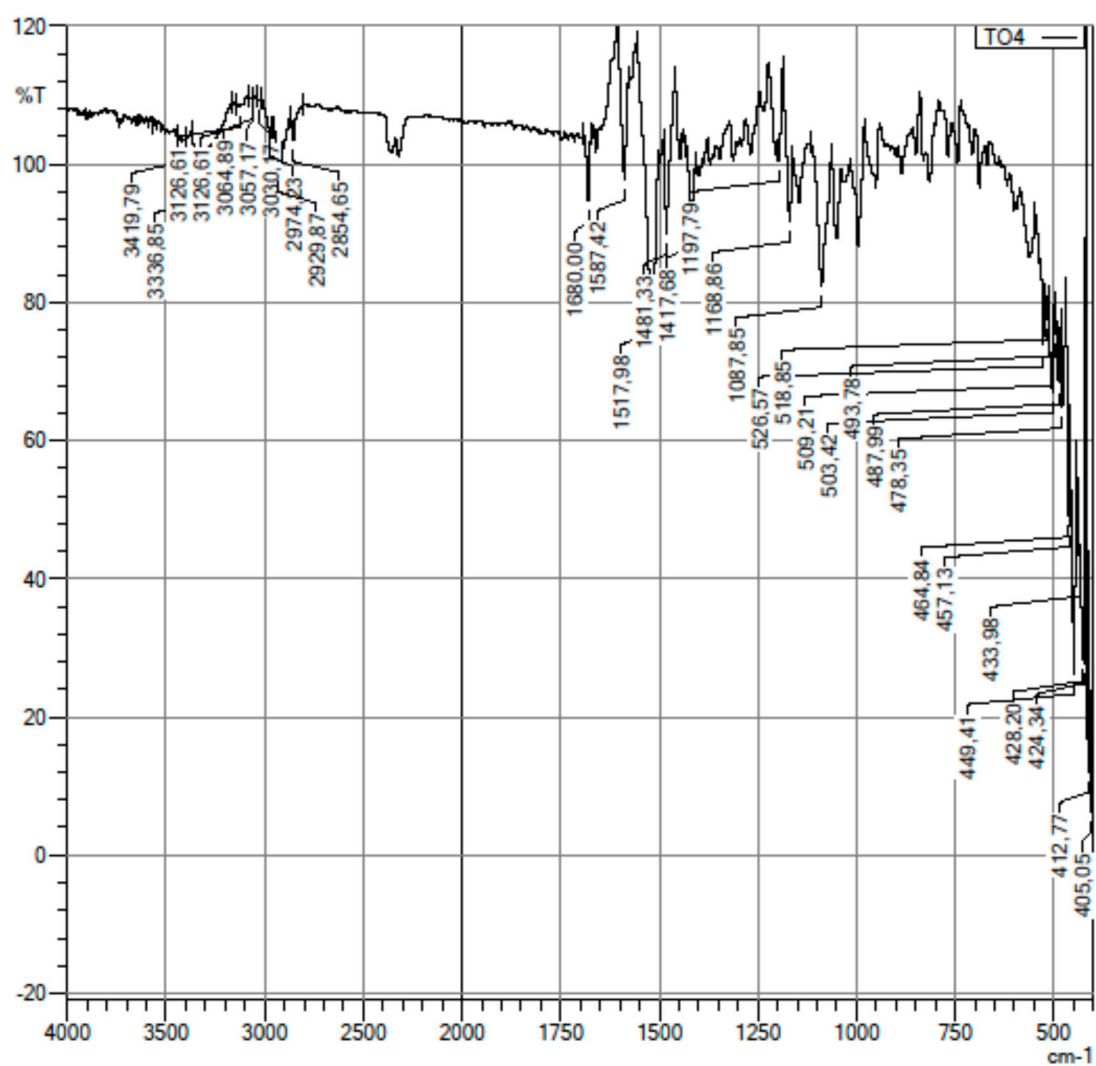

C:\Users\dopnalab\Desktop\BET7\LVTOWTO4.ispd

|   | Item           | Value          |
|---|----------------|----------------|
| 2 | Sample name    | TO-4           |
| 3 | Sample ID      |                |
| 4 | Option         |                |
| 5 | Intensity Mode | %Transmittance |
| 6 | Apodization    | Happ-Genzel    |
| 9 | No. of Scans   | 10             |

Figure 13. Compound 6d IR spectrum

Data File: C:\LabSolutions\Data\Analiz\BKaya\TO4-1\_5.lcd

| Elmt | Val. | Min | Max | Elmt | Val. | Min | Max | Elmt | Val. | Min | Max | Use Adduct |
|------|------|-----|-----|------|------|-----|-----|------|------|-----|-----|------------|
| H    | 1    | 10  | 40  | O    | 2    | 2   | 5   | Cl   | 1    | 1   | 1   | H          |
| C    | 4    | 10  | 26  | F    | 1    | 0   | 0   | Br   | 1    | 0   | 0   |            |
| N    | 3    | 5   | 5   | S    | 2    | 3   | 3   |      |      |     |     |            |

Error Margin (ppm): 5  
 HC Ratio: unlimited  
 Max Isotopes: 3  
 MSn Iso RI (%): 10.00

DBE Range: 0.0 - 19.0  
 Apply N Rule: yes  
 Isotope RI (%): 1.00  
 MSn Logic Mode: AND

Electron Ions: both  
 Use MSn Info: no  
 Isotope Res: 10000  
 Max Results: 500

Event#: 1 MS(E+) Ret. Time : 8.147 -> 8.227 Scan#: 1223 -> 1235

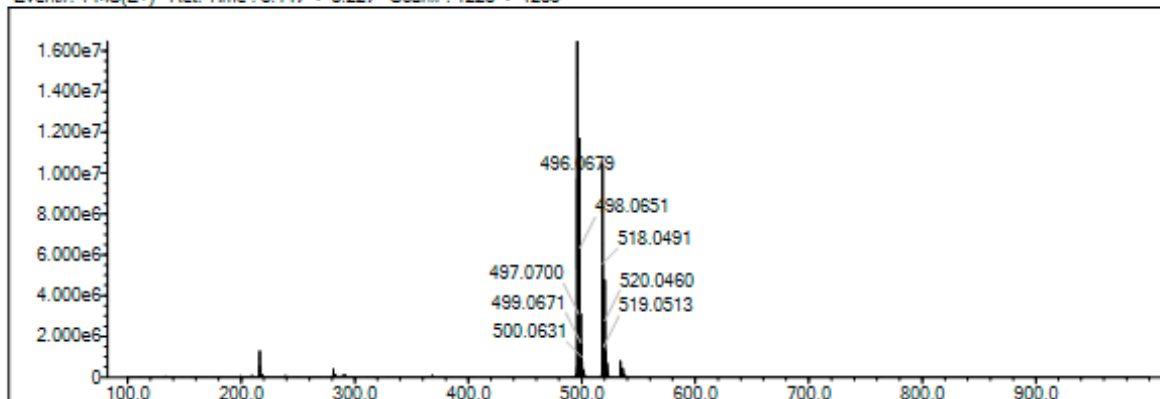

Measured region for 496.0679 m/z

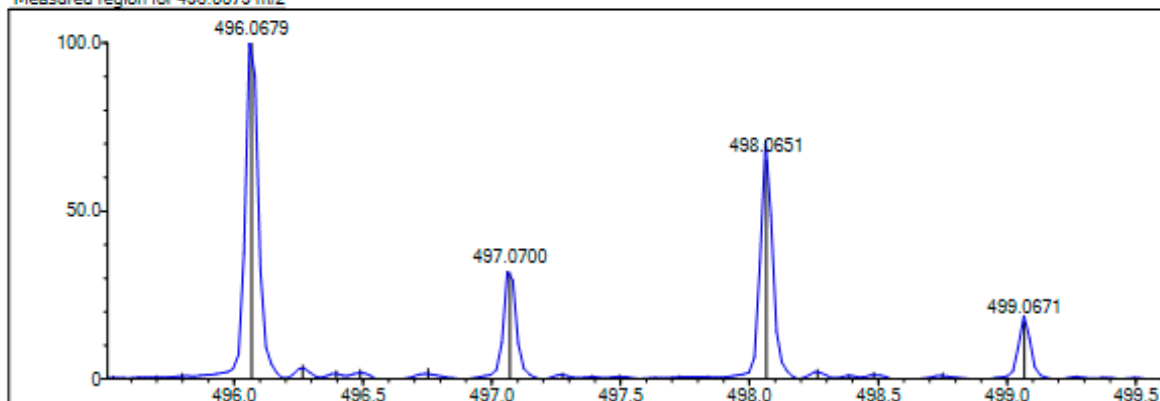

C20 H22 N5 O2 S3 Cl [M+H]<sup>+</sup> : Predicted region for 496.0697 m/z

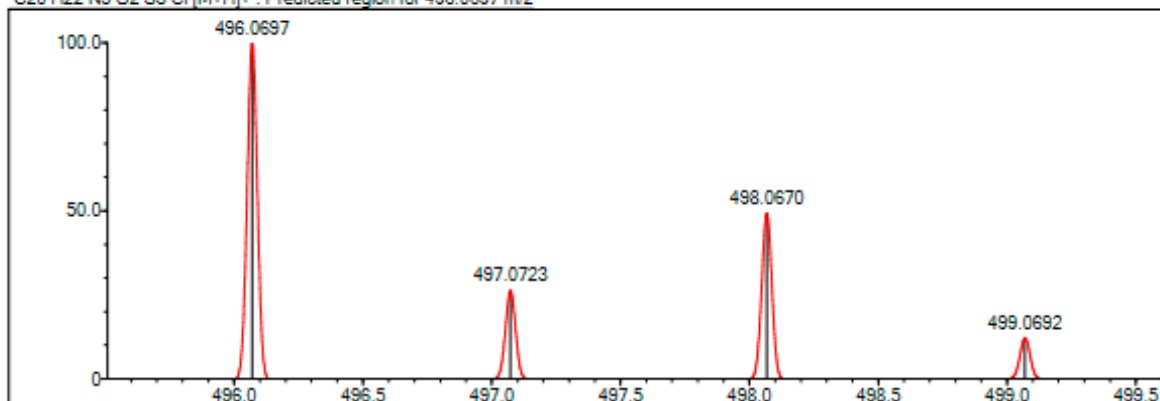

| Rank | Score | Formula (M)         | Ion                | Meas. m/z | Pred. m/z | Df. (mDa) | Df. (ppm) | Iso   | DBE  |
|------|-------|---------------------|--------------------|-----------|-----------|-----------|-----------|-------|------|
| 1    | 61.33 | C20 H22 N5 O2 S3 Cl | [M+H] <sup>+</sup> | 496.0679  | 496.0697  | -1.8      | -3.63     | 65.65 | 12.0 |

Figure 14. Compound 6d Mass spectrum

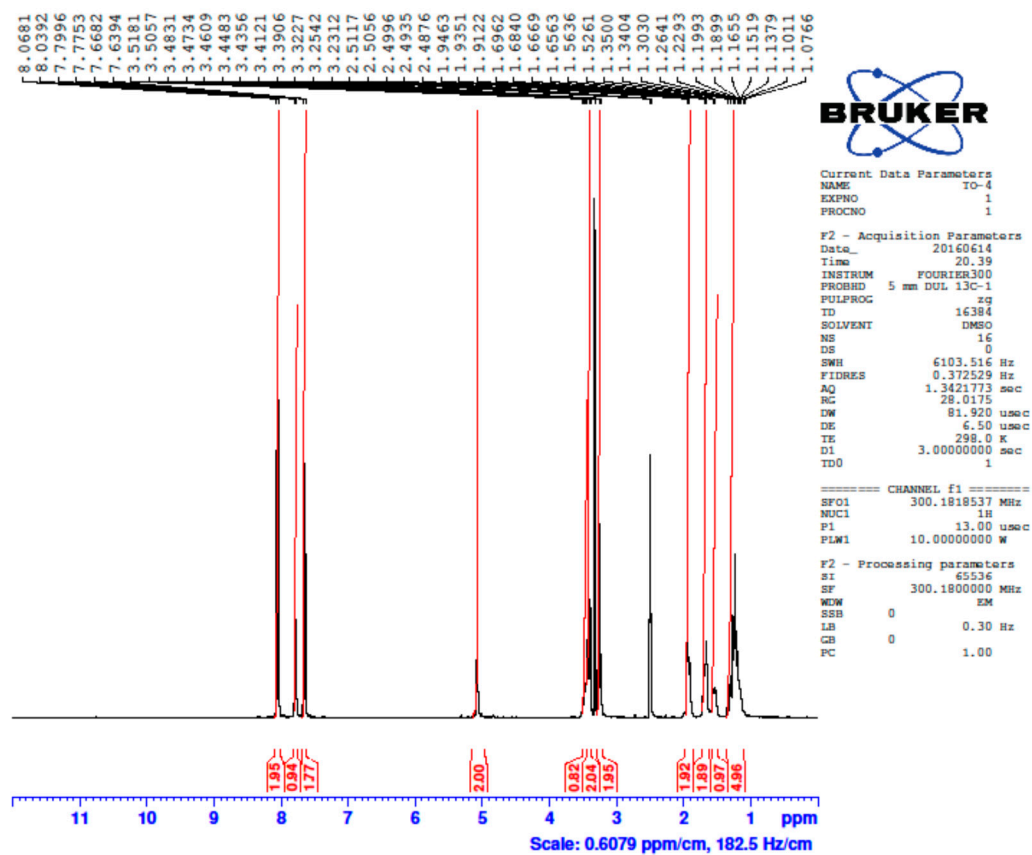

Figure 15. Compound 6d  $^1\text{H}$  NMR spectrum

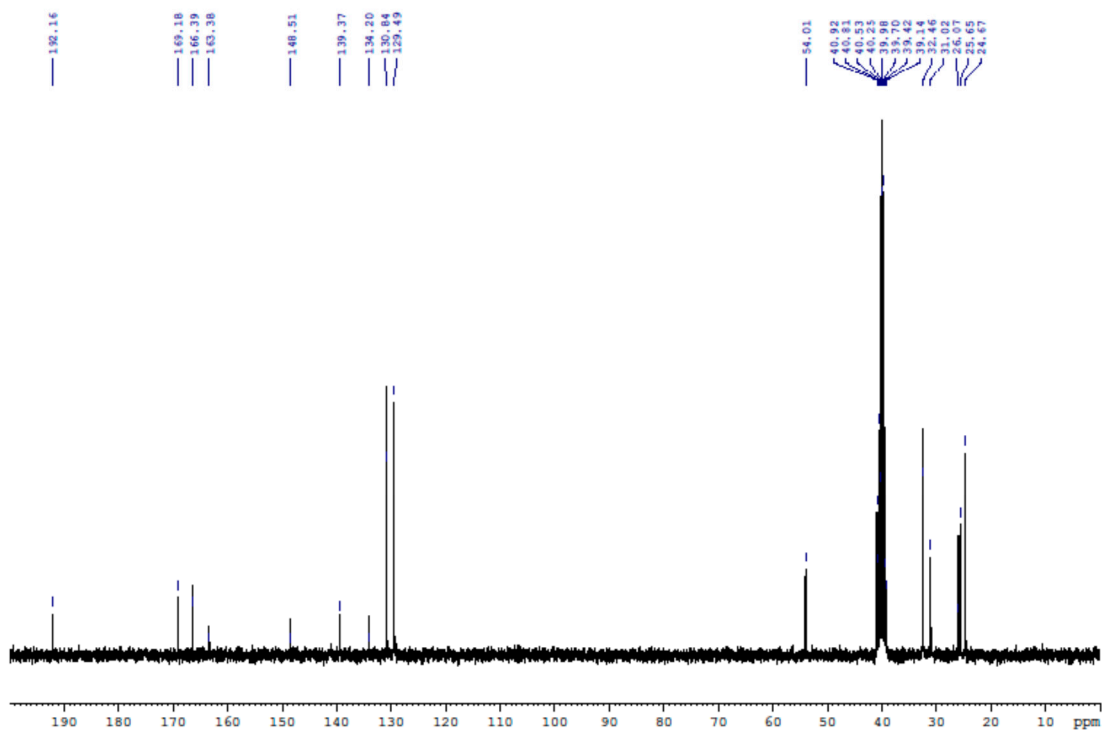

Figure 16. Compound 6d  $^{13}\text{C}$  NMR spectrum

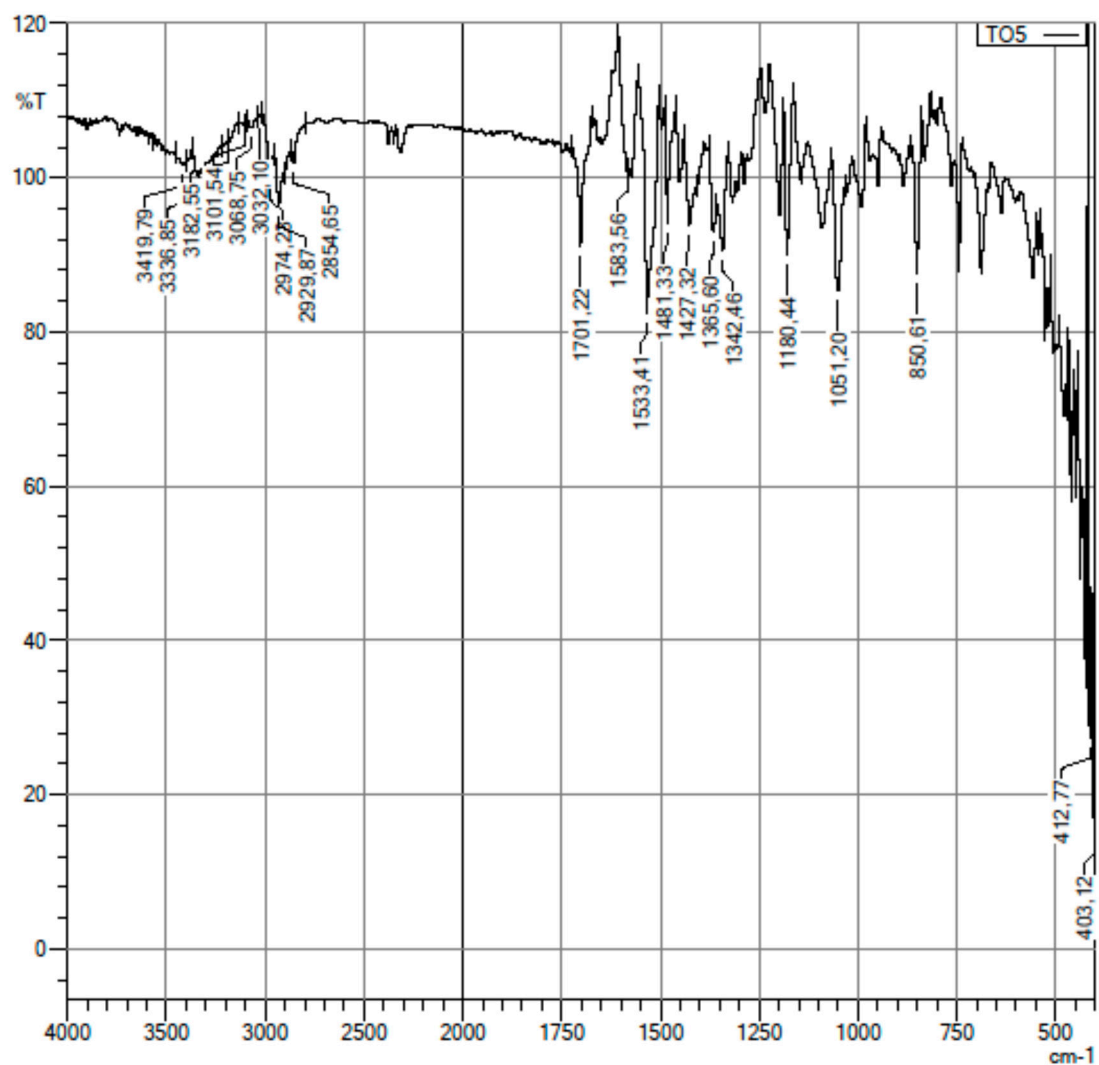

C:\Users\kdpnlab\Desktop\BET7\LVT05\TO5.ispd

|   | Item           | Value          |
|---|----------------|----------------|
| 2 | Sample name    | TO-5           |
| 3 | Sample ID      |                |
| 4 | Option         |                |
| 5 | Intensity Mode | %Transmittance |
| 6 | Apodization    | Happ-Genzel    |
| 9 | No. of Scans   | 10             |

Figure 17. Compound 6e IR spectrum

Data File: C:\LabSolutions\Data\Analiz\BKaya\TO5\_7.lcd

| Elmt | Val. | Min | Max | Elmt | Val. | Min | Max | Elmt | Val. | Min | Max | Use Adduct |
|------|------|-----|-----|------|------|-----|-----|------|------|-----|-----|------------|
| H    | 1    | 10  | 40  | O    | 2    | 2   | 5   | Cl   | 1    | 0   | 1   | H          |
| C    | 4    | 10  | 26  | F    | 1    | 0   | 0   | Br   | 1    | 0   | 0   |            |
| N    | 3    | 5   | 6   | S    | 2    | 3   | 3   |      |      |     |     |            |

Error Margin (ppm): 5  
 HC Ratio: unlimited  
 Max Isotopes: 3  
 MSn Iso RI (%): 10.00

DBE Range: 0.0 - 19.0  
 Apply N Rule: yes  
 Isotope RI (%): 1.00  
 MSn Logic Mode: AND

Electron Ions: both  
 Use MSn Info: no  
 Isotope Res: 10000  
 Max Results: 500

Event#: 1 MS(E+) Ret. Time : 7.760 -> 7.827 Scan# : 1165 -> 1175

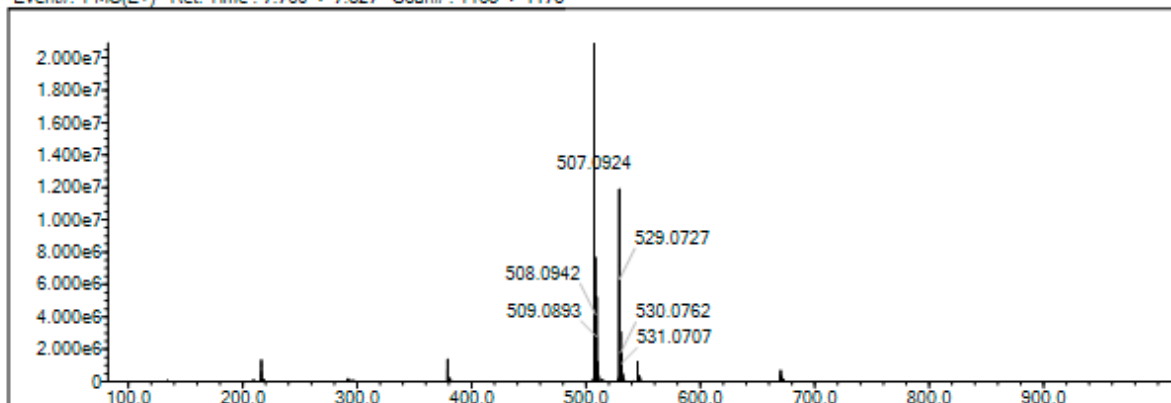

Measured region for 507.0924 m/z

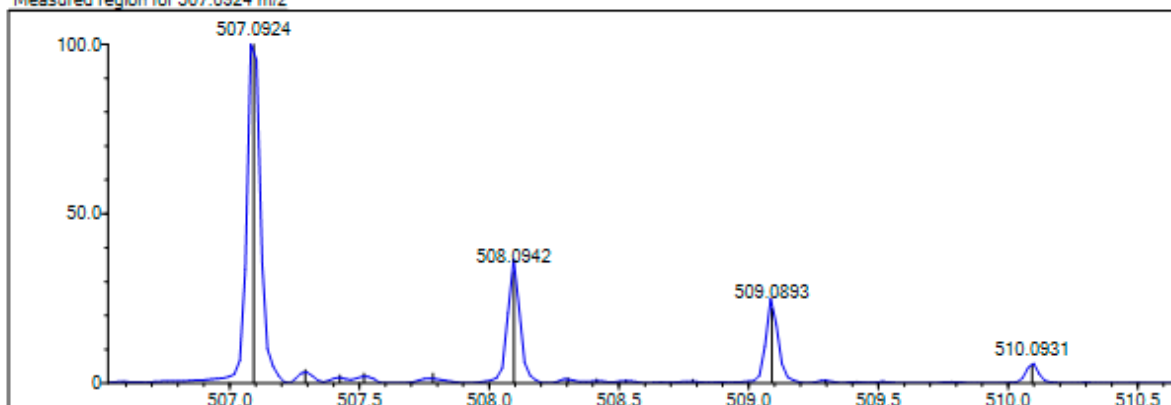

C20 H22 N6 O4 S3 [M+H]<sup>+</sup> : Predicted region for 507.0937 m/z

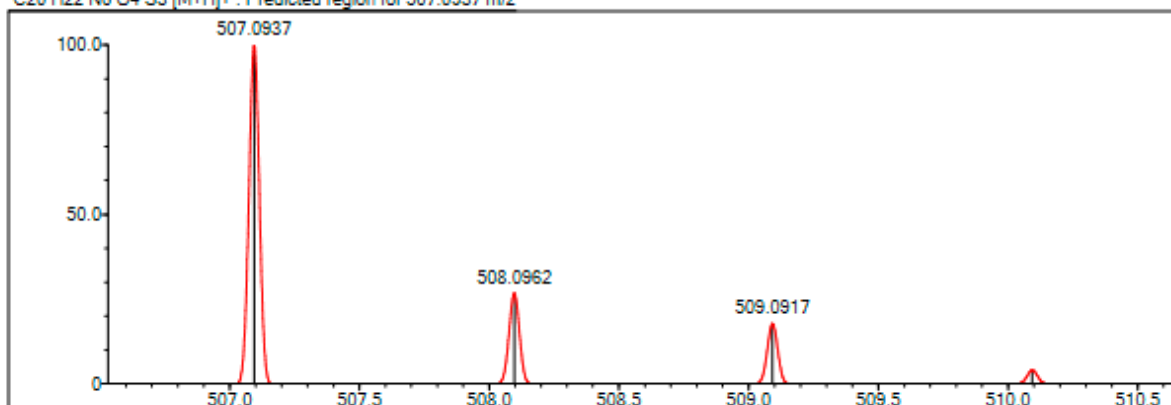

| Rank | Score | Formula (M)      | Ion                | Meas. m/z | Pred. m/z | Df. (mDa) | Df. (ppm) | Iso   | DBE  |
|------|-------|------------------|--------------------|-----------|-----------|-----------|-----------|-------|------|
| 1    | 77.90 | C20 H22 N6 O4 S3 | [M+H] <sup>+</sup> | 507.0924  | 507.0937  | -1.3      | -2.56     | 81.07 | 13.0 |

Figure 18. Compound 6e Mass spectrum

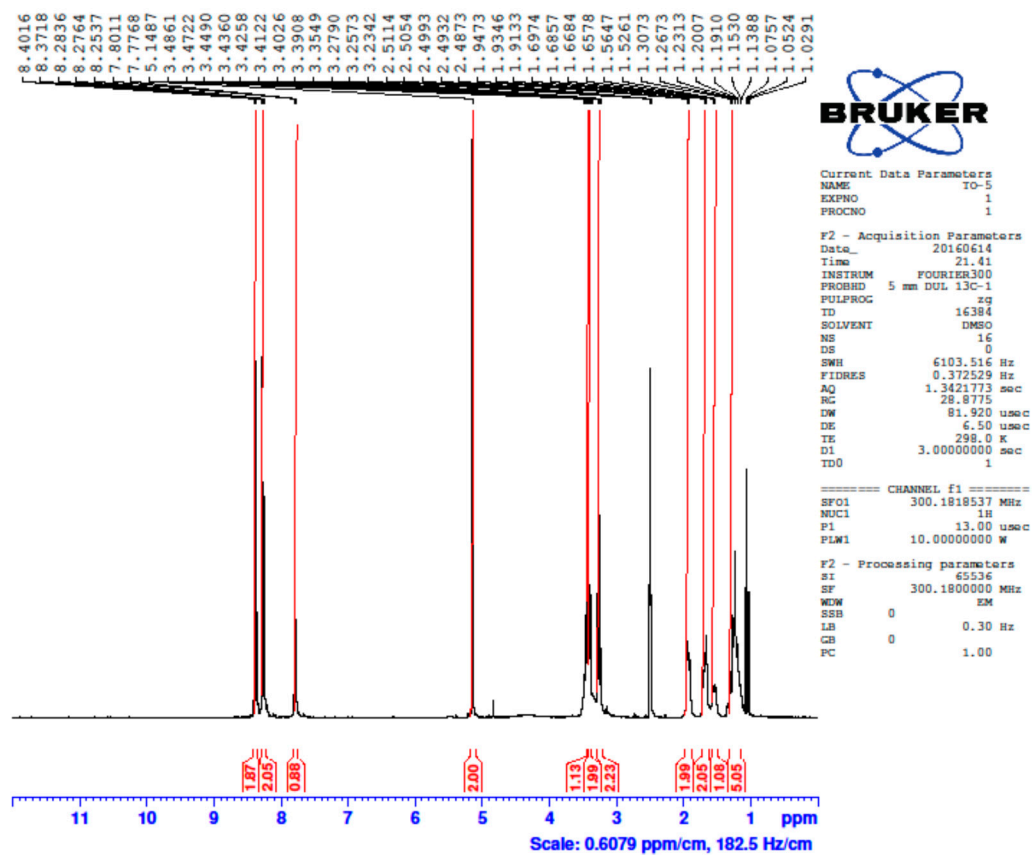

Figure 19. Compound 6e  $^1\text{H}$  NMR spectrum

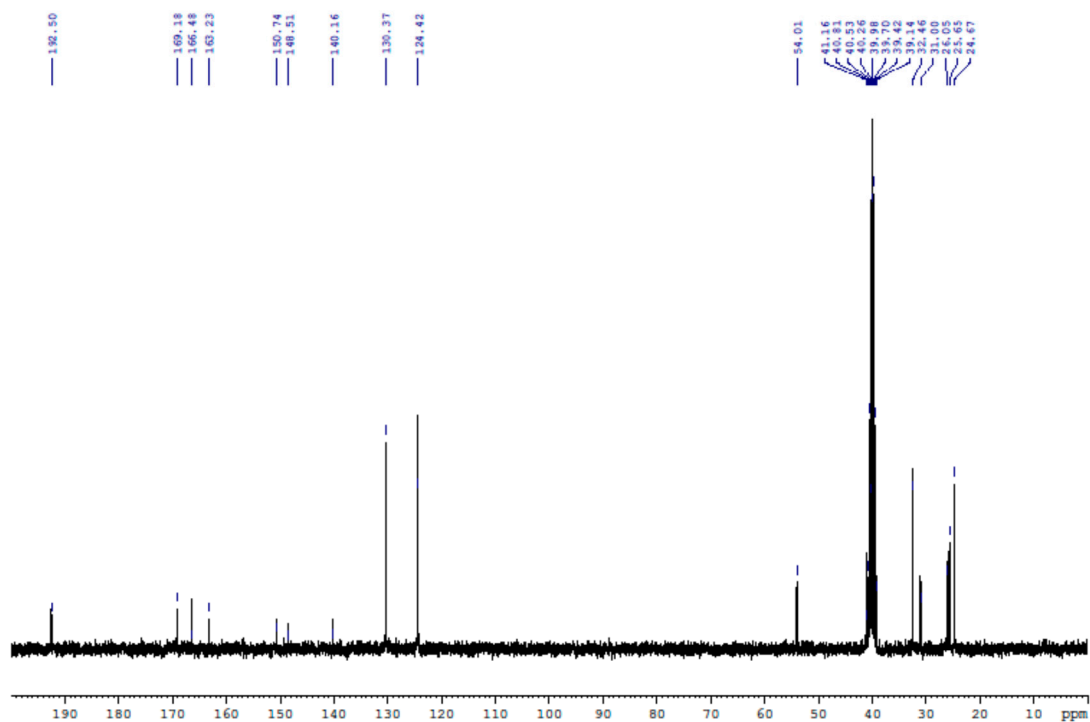

Figure 20. Compound 6e  $^{13}\text{C}$  NMR spectrum



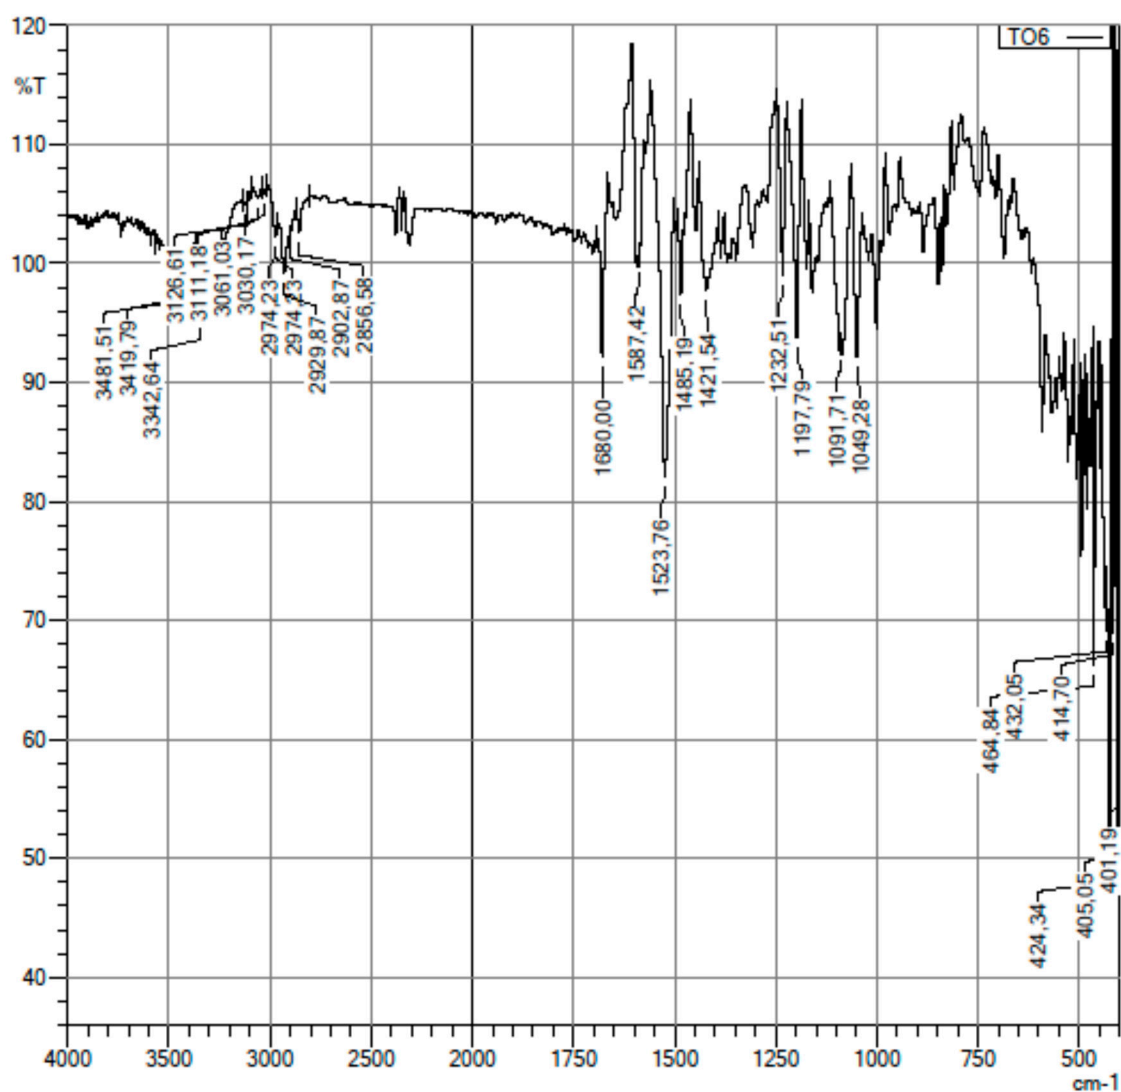

C:\Users\dopnlab\Desktop\BET7\LT\TO\TO6.ispd

|   | Item           | Value           |
|---|----------------|-----------------|
| 2 | Sample name    | TO-6            |
| 3 | Sample ID      |                 |
| 4 | Option         |                 |
| 5 | Intensity Mode | % Transmittance |
| 6 | Apodization    | Happ-Genzel     |
| 9 | No. of Scans   | 10              |

Figure 21. Compound 6f IR spectrum

Data File: C:\LabSolutions\Data\Analiz\BKaya\TO6\_8.lod

| Elmt | Val. | Min | Max | Elmt | Val. | Min | Max | Elmt | Val. | Min | Max | Use Adduct |
|------|------|-----|-----|------|------|-----|-----|------|------|-----|-----|------------|
| H    | 1    | 10  | 40  | O    | 2    | 2   | 5   | Cl   | 1    | 0   | 1   | H          |
| C    | 4    | 10  | 26  | F    | 1    | 1   | 1   | Br   | 1    | 0   | 0   |            |
| N    | 3    | 5   | 6   | S    | 2    | 3   | 3   |      |      |     |     |            |

Error Margin (ppm): 3  
 HC Ratio: unlimited  
 Max Isotopes: 3  
 MSn Iso RI (%): 10.00

DBE Range: 0.0 - 19.0  
 Apply N Rule: yes  
 Isotope RI (%): 1.00  
 MSn Logic Mode: AND

Electron Ions: both  
 Use MSn Info: no  
 Isotope Res: 10000  
 Max Results: 500

Event#: 1 MS(E+) Ret. Time : 7.827 -> 7.867 Scan#: 1175 -> 1181

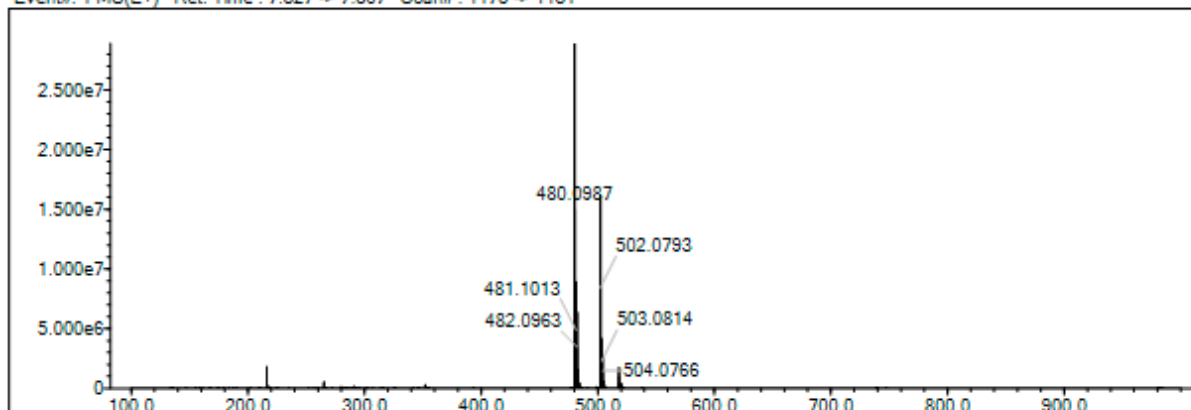

Measured region for 480.0987 m/z

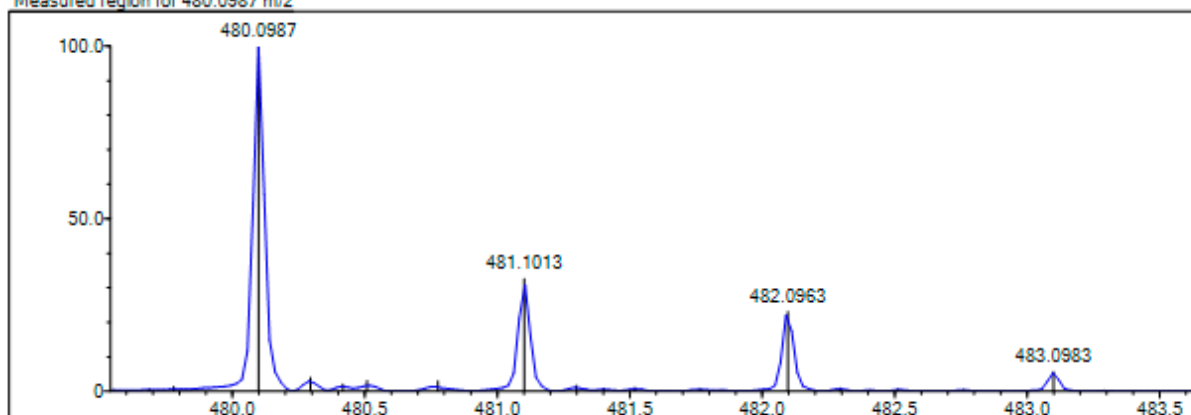

C20 H22 N5 O2 F S3 [M+H]+ : Predicted region for 480.0992 m/z

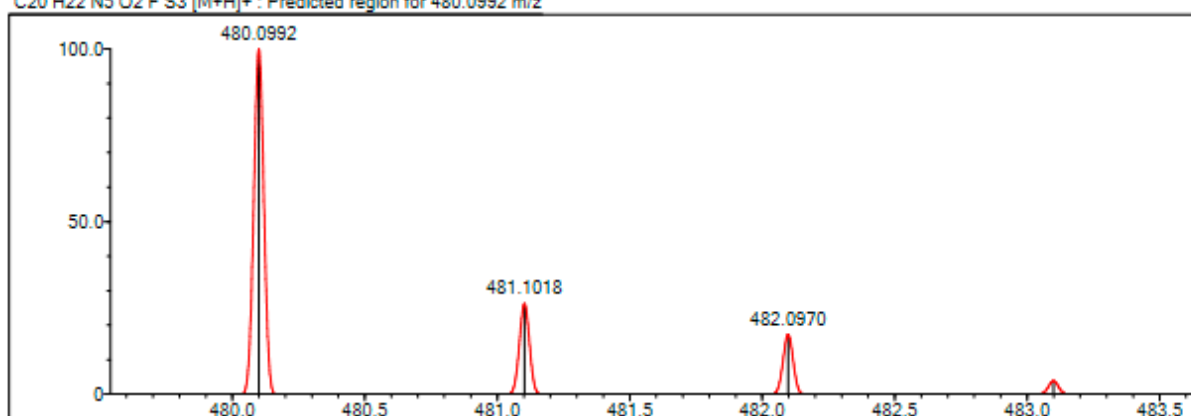

| Rank | Score | Formula (M)        | Ion    | Meas. m/z | Pred. m/z | Df. (mDa) | Df. (ppm) | Iso   | DBE  |
|------|-------|--------------------|--------|-----------|-----------|-----------|-----------|-------|------|
| 1    | 91.96 | C20 H22 N5 O2 F S3 | [M+H]+ | 480.0987  | 480.0992  | -0.5      | -1.04     | 92.05 | 12.0 |

Figure 22. Compound 6f Mass spectrum

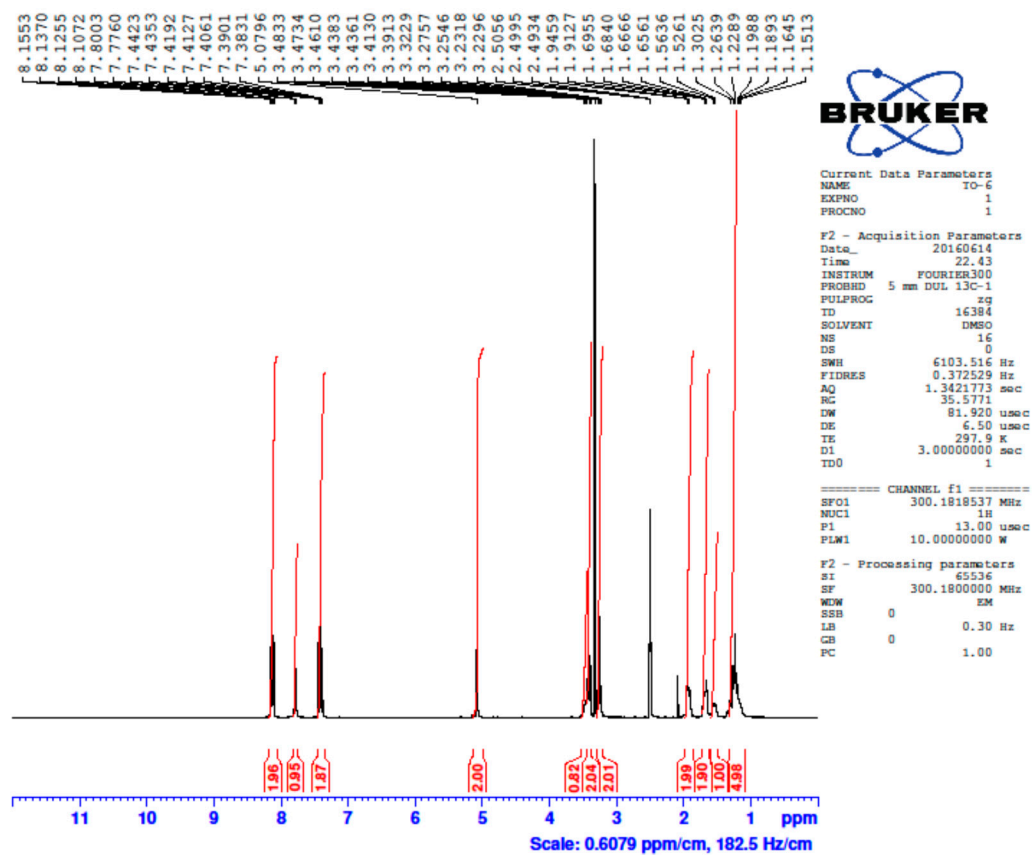

Figure 23. Compound 6f <sup>1</sup>H NMR spectrum

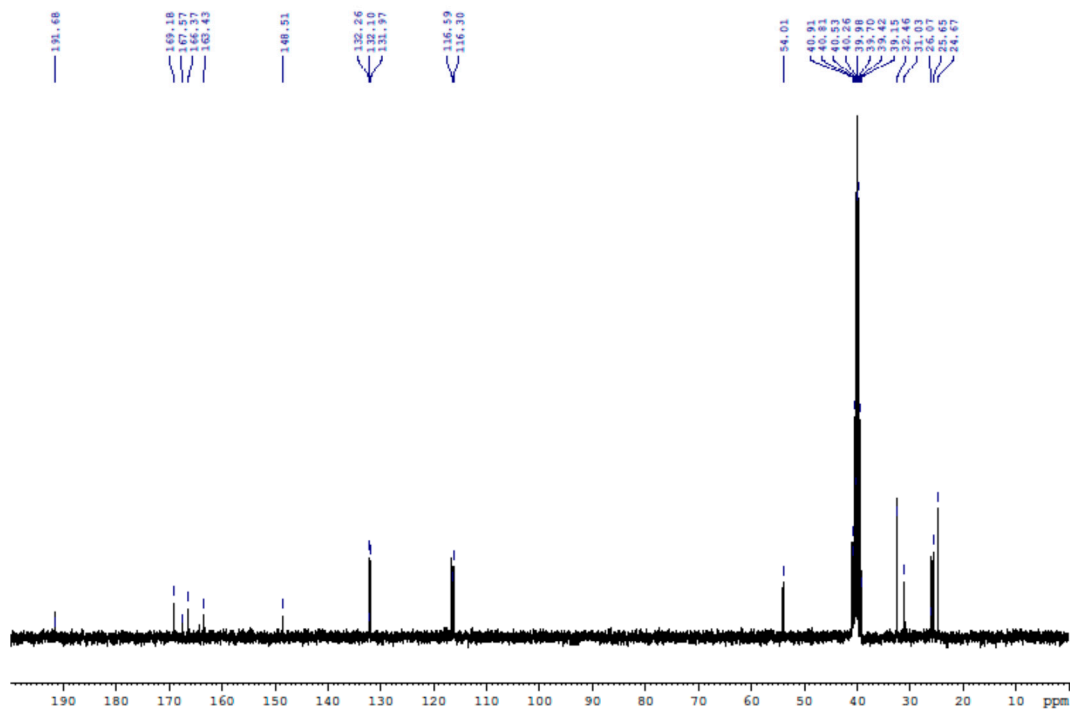

Figure 24. Compound 6f <sup>13</sup>C NMR spectrum

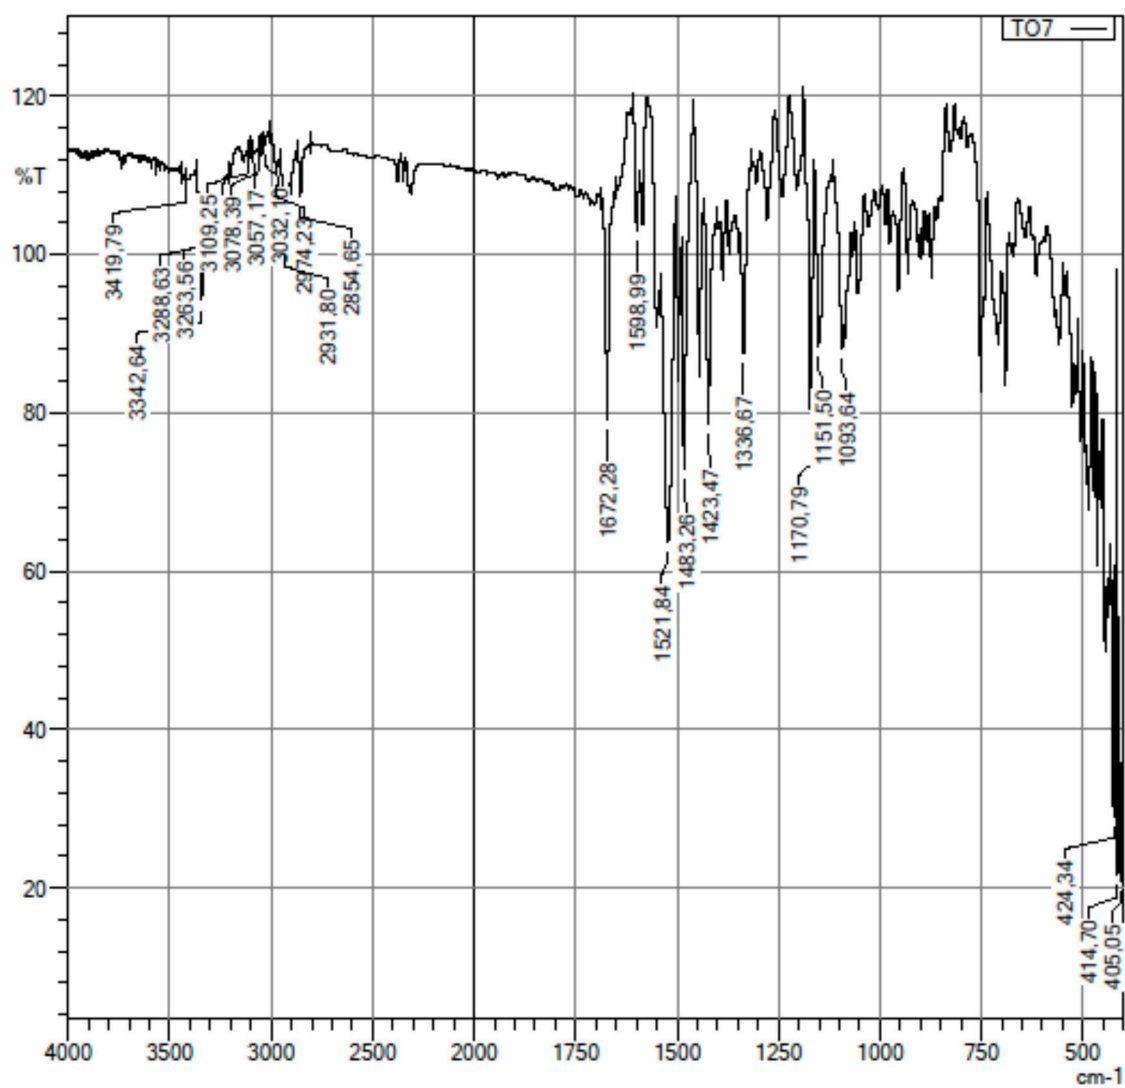

C:\Users\dopnab\Desktop\BET7L\TO7\TO7.ispd

|   | Item           | Value          |
|---|----------------|----------------|
| 2 | Sample name    | TO-7           |
| 3 | Sample ID      |                |
| 4 | Option         |                |
| 5 | Intensity Mode | %Transmittance |
| 6 | Apodization    | Happ-Genzel    |
| 9 | No. of Scans   | 10             |

Figure 25. Compound 6g IR spectrum

Data File: C:\LabSolutions\Data\Analiz\BKaya\TO7\_9.lcd

| Elmt | Val. | Min | Max | Elmt | Val. | Min | Max | Elmt | Val. | Min | Max | Use Adduct |
|------|------|-----|-----|------|------|-----|-----|------|------|-----|-----|------------|
| H    | 1    | 10  | 40  | O    | 2    | 2   | 5   | Cl   | 1    | 0   | 1   | H          |
| C    | 4    | 10  | 26  | F    | 1    | 0   | 1   | Br   | 1    | 0   | 0   |            |
| N    | 3    | 5   | 6   | S    | 2    | 3   | 3   |      |      |     |     |            |

Error Margin (ppm): 3  
 HC Ratio: unlimited  
 Max Isotopes: 3  
 MSn Iso RI (%): 10.00

DBE Range: 0.0 - 19.0  
 Apply N Rule: yes  
 Isotope RI (%): 1.00  
 MSn Logic Mode: AND

Electron Ions: both  
 Use MSn Info: no  
 Isotope Res: 10000  
 Max Results: 500

Event#: 1 MS(E+) Ret. Time : 7.440 -&gt; 7.480 Scan#: 1117 -&gt; 1123

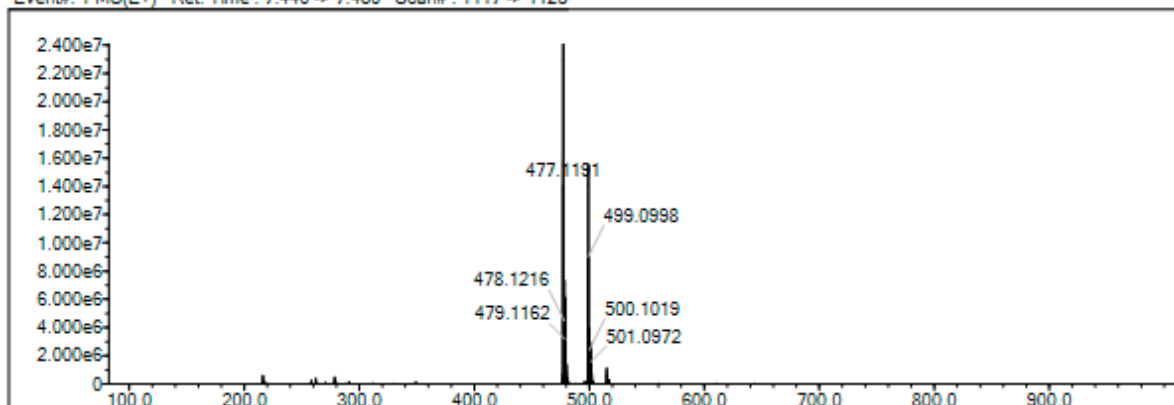

Measured region for 477.1191 m/z

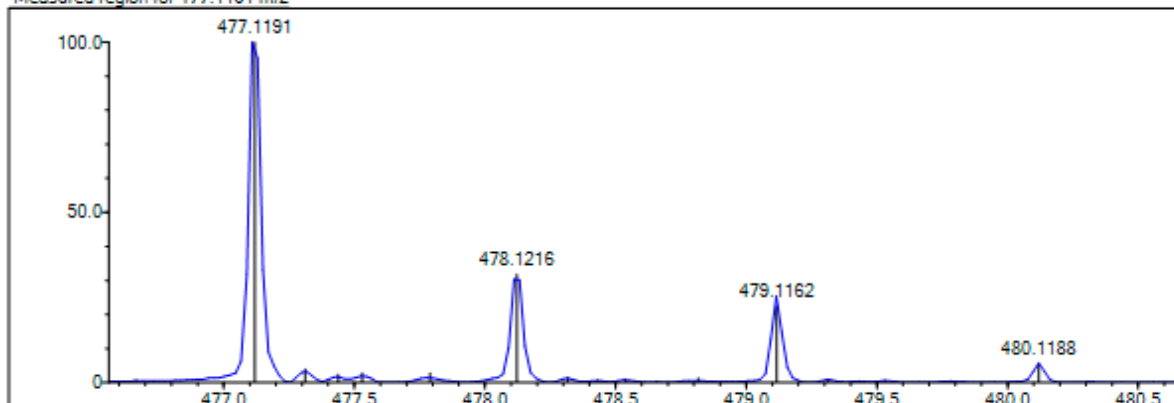

C20 H24 N6 O2 S3 [M+H]+ : Predicted region for 477.1196 m/z

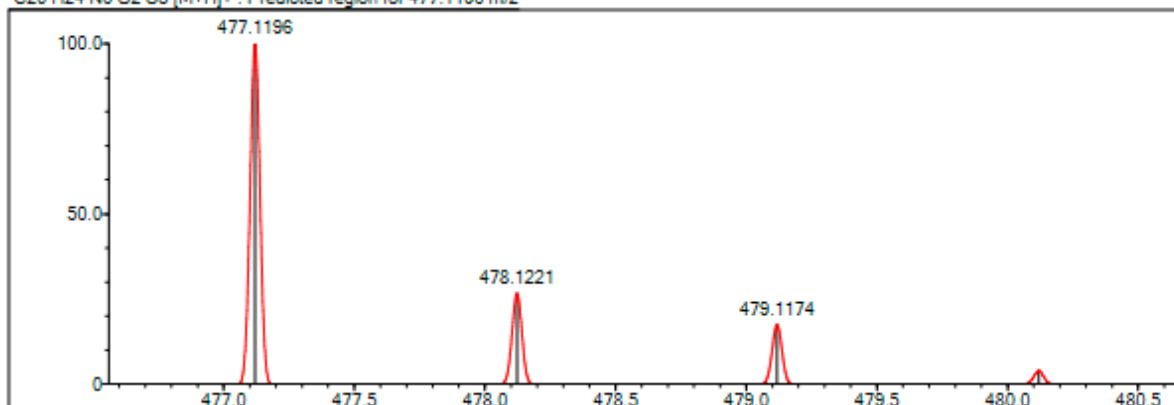

| Rank | Score | Formula (M)      | Ion                | Meas. m/z | Pred. m/z | Df. (mDa) | Df. (ppm) | Iso   | DBE  |
|------|-------|------------------|--------------------|-----------|-----------|-----------|-----------|-------|------|
| 1    | 84.11 | C20 H24 N6 O2 S3 | [M+H] <sup>+</sup> | 477.1191  | 477.1196  | -0.5      | -1.05     | 84.22 | 12.0 |

Figure 26. Compound 6g Mass spectrum

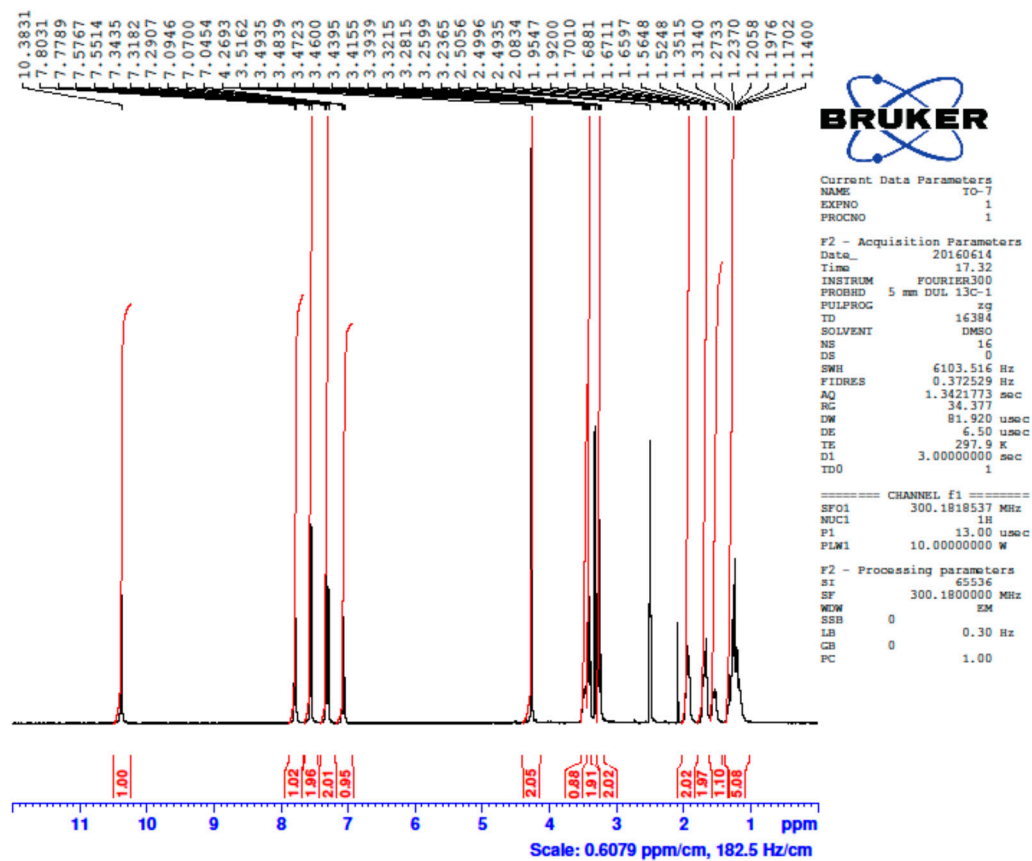

Figure 27. Compound 6g <sup>1</sup>H NMR spectrum

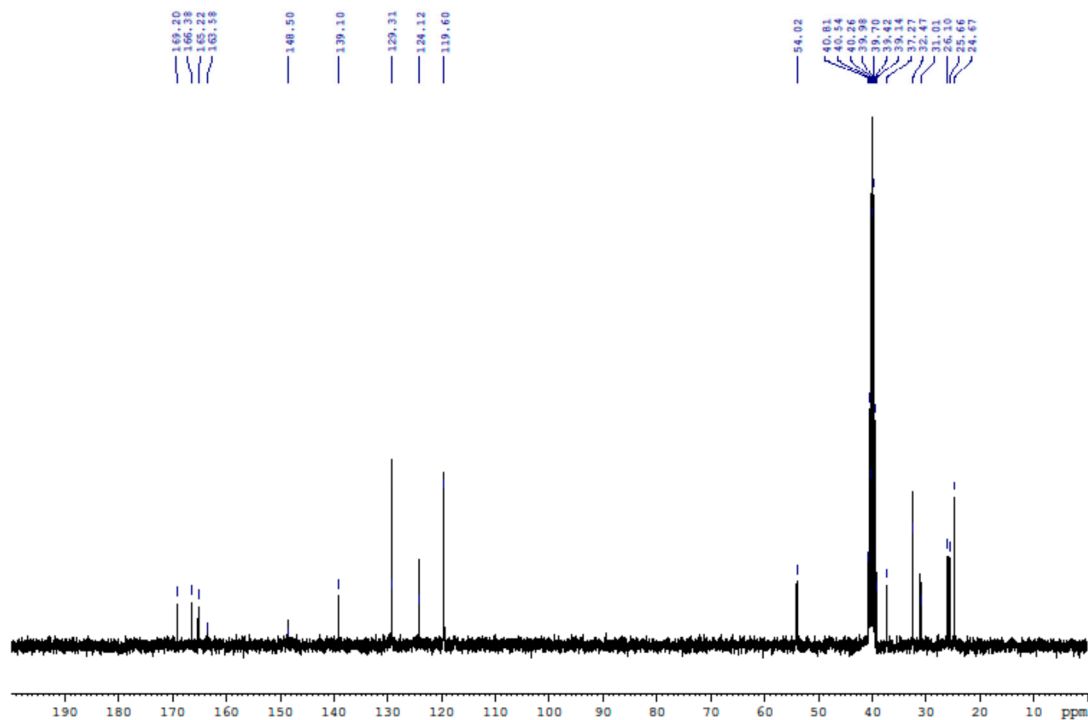

Figure 28. Compound 6g <sup>13</sup>C NMR spectrum

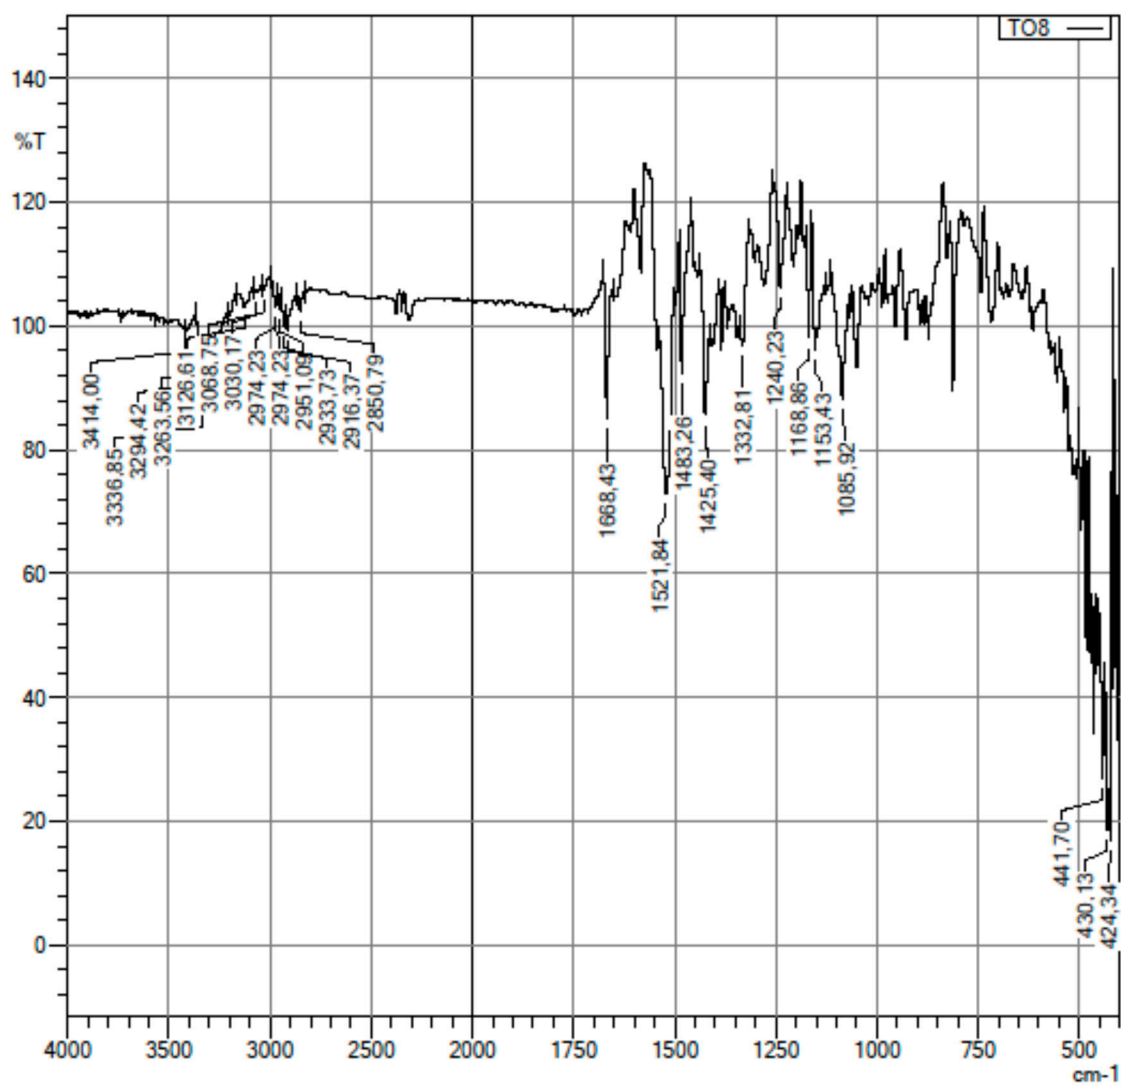

C:\Users\dopnlab\Desktop\BET7L\TO8\TO8.ispd

|   | Item           | Value          |
|---|----------------|----------------|
| 2 | Sample name    | TO-8           |
| 3 | Sample ID      |                |
| 4 | Option         |                |
| 5 | Intensity Mode | %Transmittance |
| 6 | Apodization    | Happ-Genzel    |
| 9 | No. of Scans   | 10             |

Figure 29. Compound 6h IR spectrum

Data File: C:\LabSolutions\Data\Analiz\BKaya\TO8\_10.lcd

| Elmt | Val | Min | Max | Elmt | Val | Min | Max | Elmt | Val | Min | Max | Use Adduct |
|------|-----|-----|-----|------|-----|-----|-----|------|-----|-----|-----|------------|
| H    | 1   | 10  | 40  | O    | 2   | 2   | 5   | Cl   | 1   | 0   | 0   | H          |
| C    | 4   | 10  | 26  | F    | 1   | 0   | 1   | Br   | 1   | 0   | 0   |            |
| N    | 3   | 5   | 6   | S    | 2   | 3   | 3   |      |     |     |     |            |

Error Margin (ppm): 5  
 HC Ratio: unlimited  
 Max Isotopes: 3  
 MSn Iso RI (%): 10.00

DBE Range: 9.0 - 19.0  
 Apply N Rule: yes  
 Isotope RI (%): 1.00  
 MSn Logic Mode: AND

Electron Ions: both  
 Use MSn Info: no  
 Isotope Res: 10000  
 Max Results: 500

Event#: 1 MS(E+) Ret. Time : 7.720 -&gt; 7.787 Scan#: 1159 -&gt; 1169

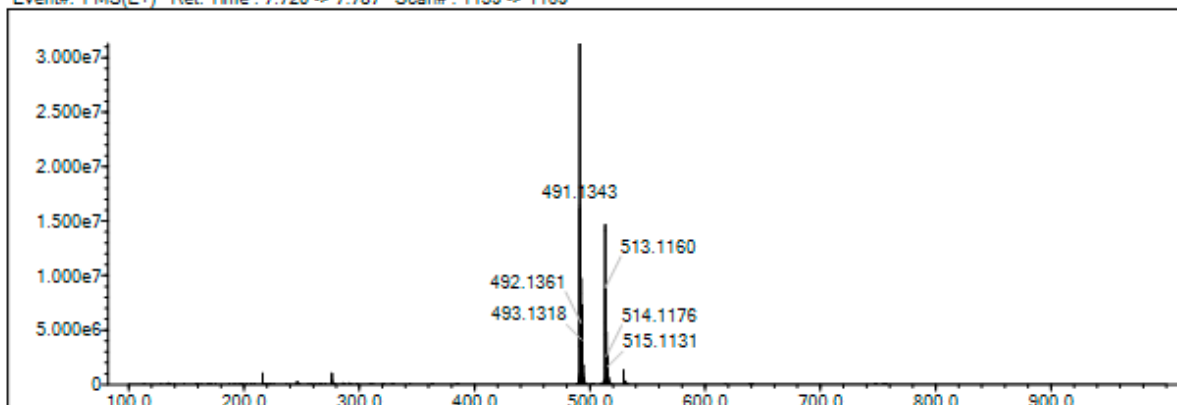

Measured region for 491.1343 m/z

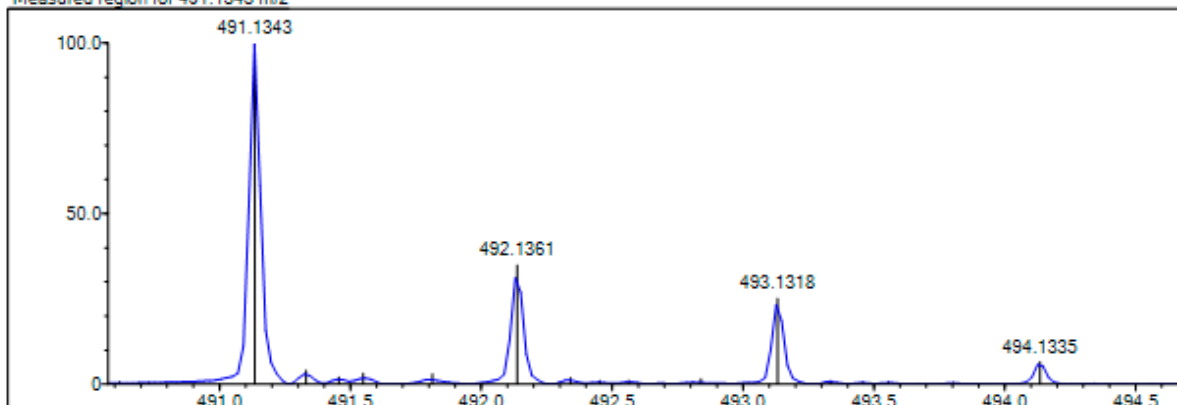

C21 H26 N6 O2 S3 [M+H]+ : Predicted region for 491.1352 m/z

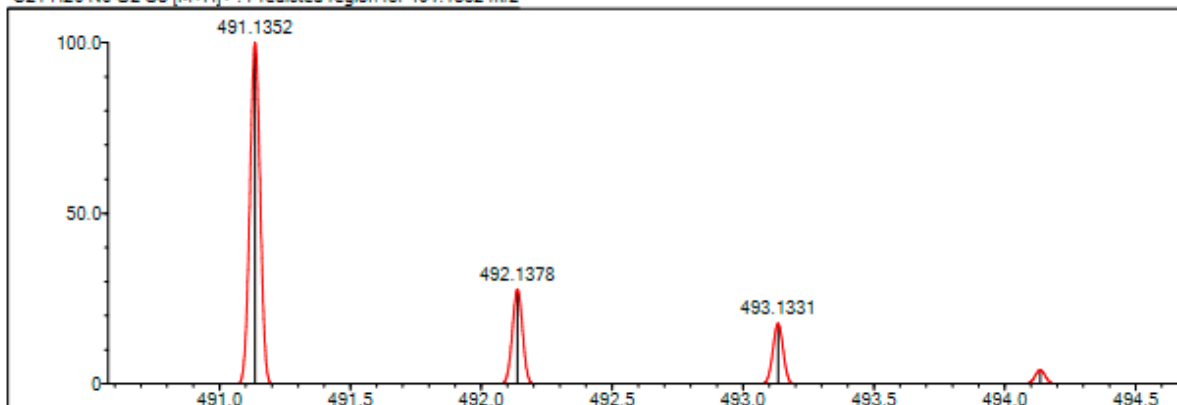

| Rank | Score | Formula (M)      | Ion                | Meas. m/z | Pred. m/z | Df. (mDa) | Df. (ppm) | Iso   | DBE  |
|------|-------|------------------|--------------------|-----------|-----------|-----------|-----------|-------|------|
| 1    | 88.03 | C21 H26 N6 O2 S3 | [M+H] <sup>+</sup> | 491.1343  | 491.1352  | -0.9      | -1.83     | 89.90 | 12.0 |

Figure 30. Compound 6h Mass spectrum



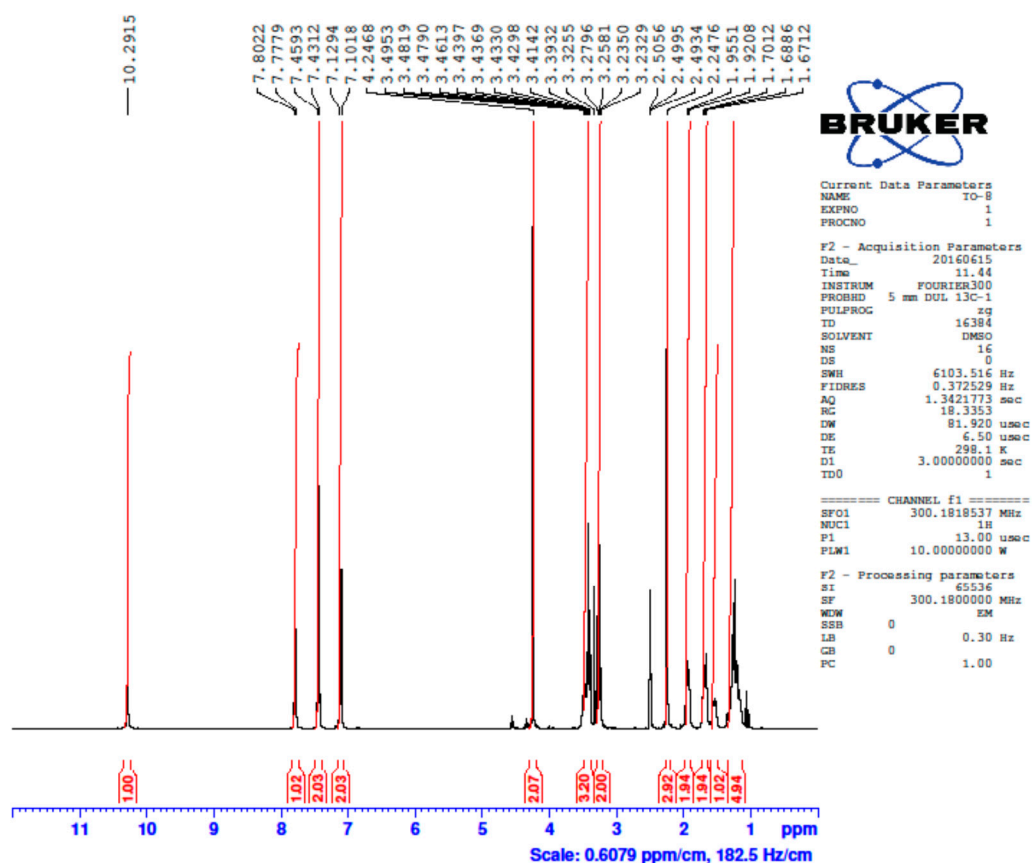

Figure 31. Compound 6h  $^1\text{H}$  NMR spectrum

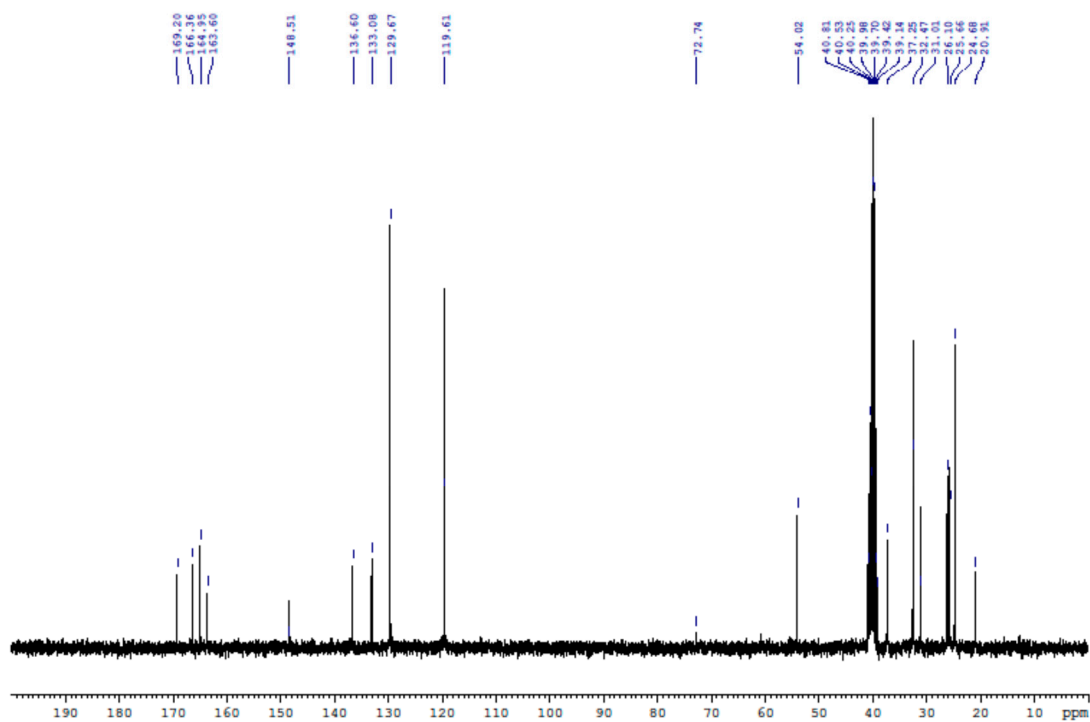

Figure 32. Compound 6h  $^{13}\text{C}$  NMR spectrum

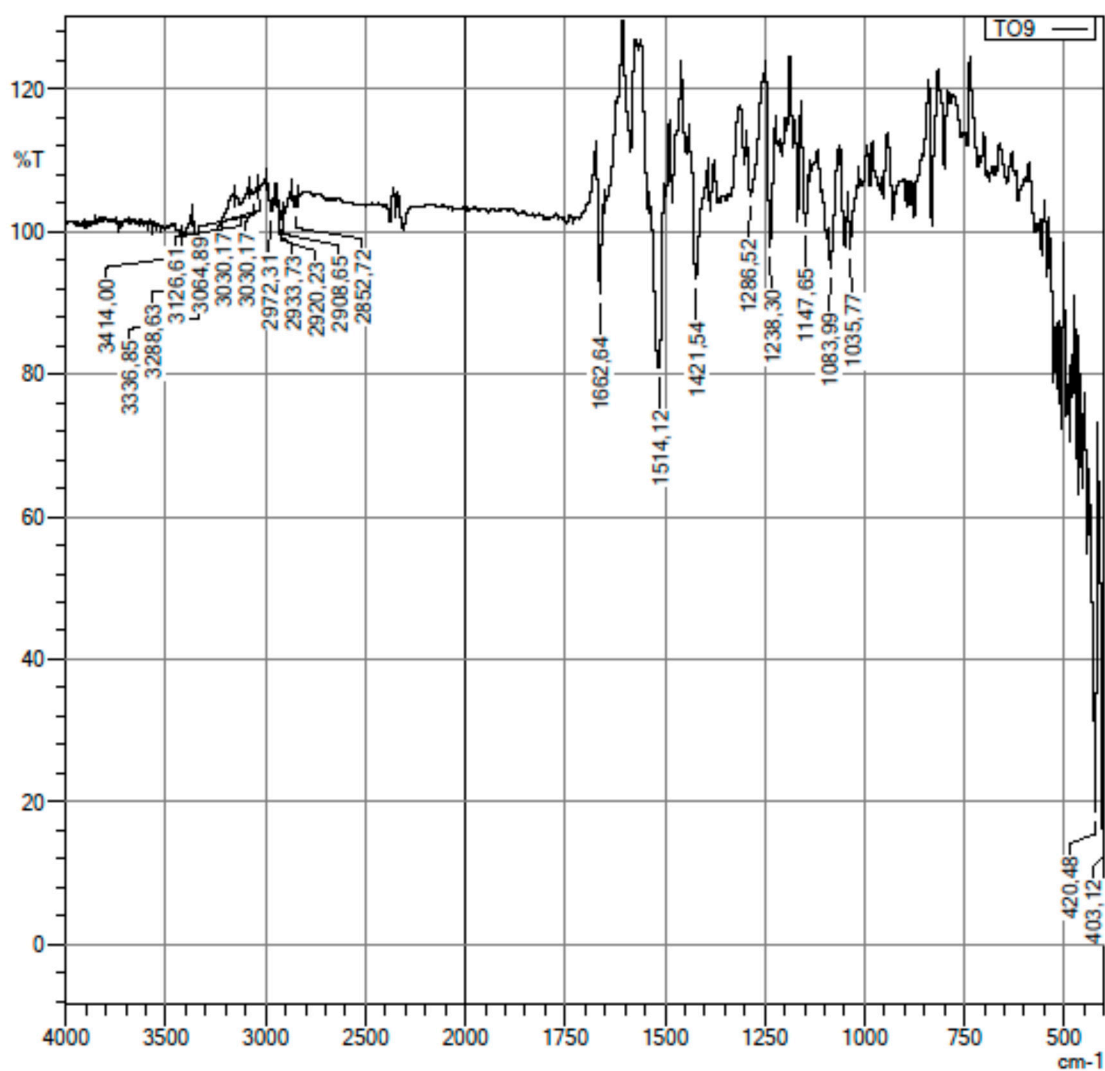

C:\Users\dopnalab\Desktop\BET9\L\TO\TO9.ispd

|   | Item           | Value          |
|---|----------------|----------------|
| 2 | Sample name    | TO-9           |
| 3 | Sample ID      |                |
| 4 | Option         |                |
| 5 | Intensity Mode | %Transmittance |
| 6 | Apodization    | Happ-Genzel    |
| 9 | No. of Scans   | 10             |

Figure 33. Compound 6i IR spectrum

Data File: C:\LabSolutions\Data\Analiz\BKaya\TO9\_11.lcd

| Elmt | Val. | Min | Max | Elmt | Val. | Min | Max | Elmt | Val. | Min | Max | Use Adduct |
|------|------|-----|-----|------|------|-----|-----|------|------|-----|-----|------------|
| H    | 1    | 10  | 40  | O    | 2    | 2   | 5   | Cl   | 1    | 0   | 0   | H          |
| C    | 4    | 10  | 26  | F    | 1    | 0   | 1   | Br   | 1    | 0   | 0   |            |
| N    | 3    | 5   | 6   | S    | 2    | 3   | 3   |      |      |     |     |            |

Error Margin (ppm): 5  
 DBE Range: 9.0 - 19.0  
 Electron Ions: both  
 HC Ratio: unlimited  
 Apply N Rule: yes  
 Use MSn Info: no  
 Max Isotopes: 3  
 Isotope RI (%): 1.00  
 Isotope Res: 10000  
 MSn Iso RI (%): 10.00  
 MSn Logic Mode: AND  
 Max Results: 500

Event#: 1 MS(E+) Ret. Time : 7.307 -> 7.360 Scan#: 1097 -> 1105

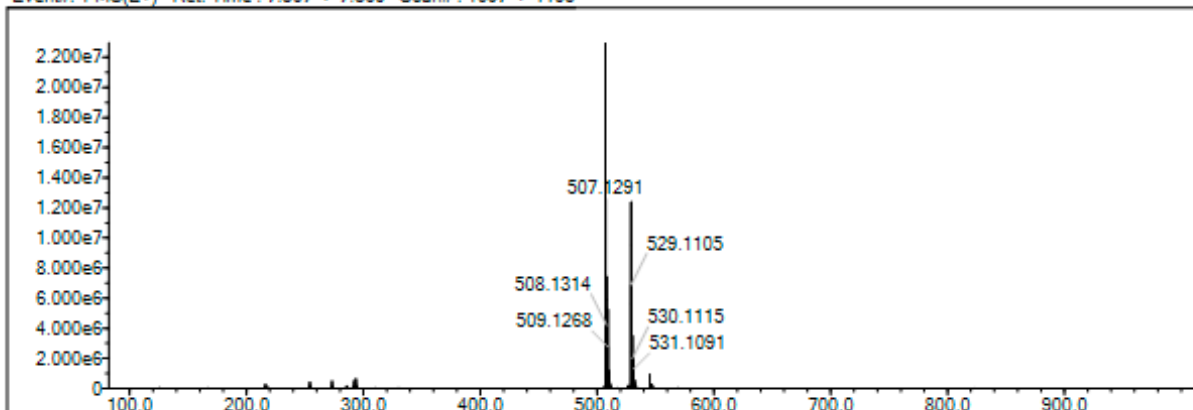

Measured region for 507.1291 m/z

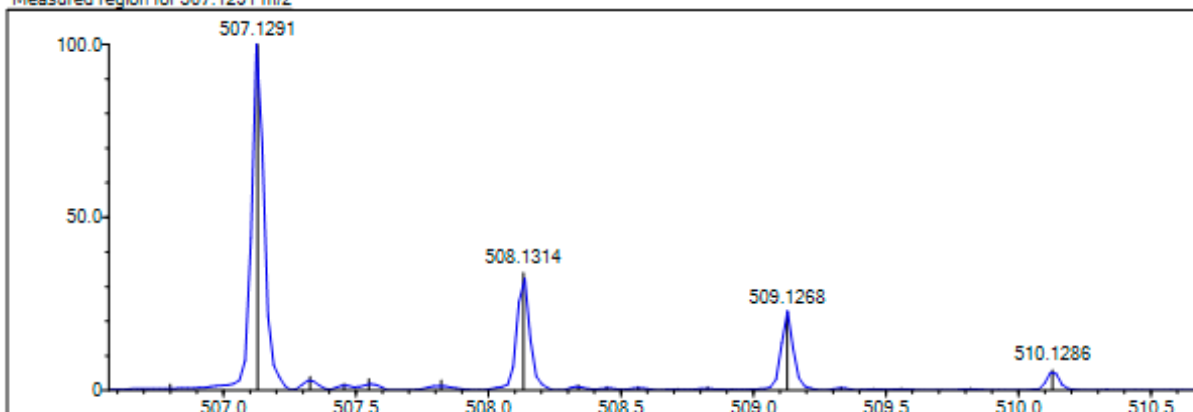

C21 H26 N6 O3 S3 [M+H]+ : Predicted region for 507.1301 m/z

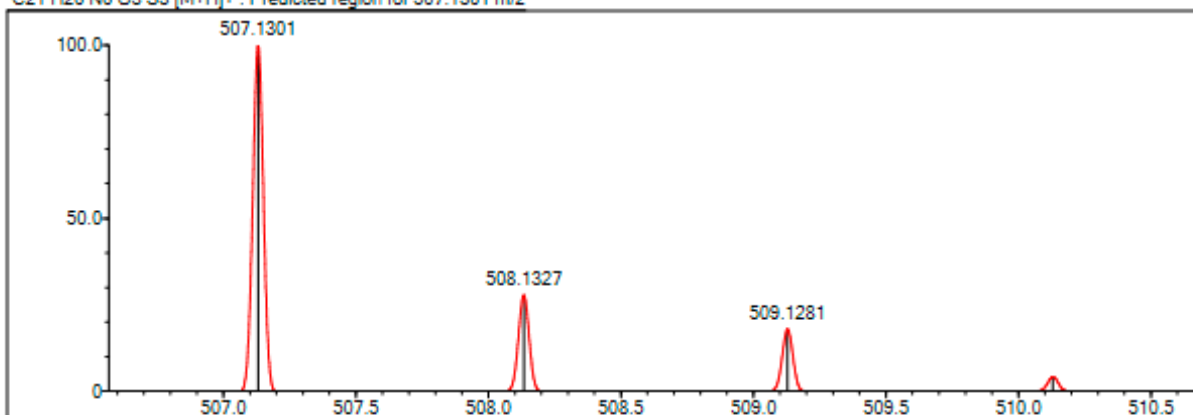

| Rank | Score | Formula (M)      | Ion                | Meas. m/z | Pred. m/z | Df. (mDa) | Df. (ppm) | Iso   | DBE  |
|------|-------|------------------|--------------------|-----------|-----------|-----------|-----------|-------|------|
| 1    | 79.14 | C21 H26 N6 O3 S3 | [M+H] <sup>+</sup> | 507.1291  | 507.1301  | -1.0      | -1.97     | 81.10 | 12.0 |

Figure 34. Compound 6i Mass spectrum

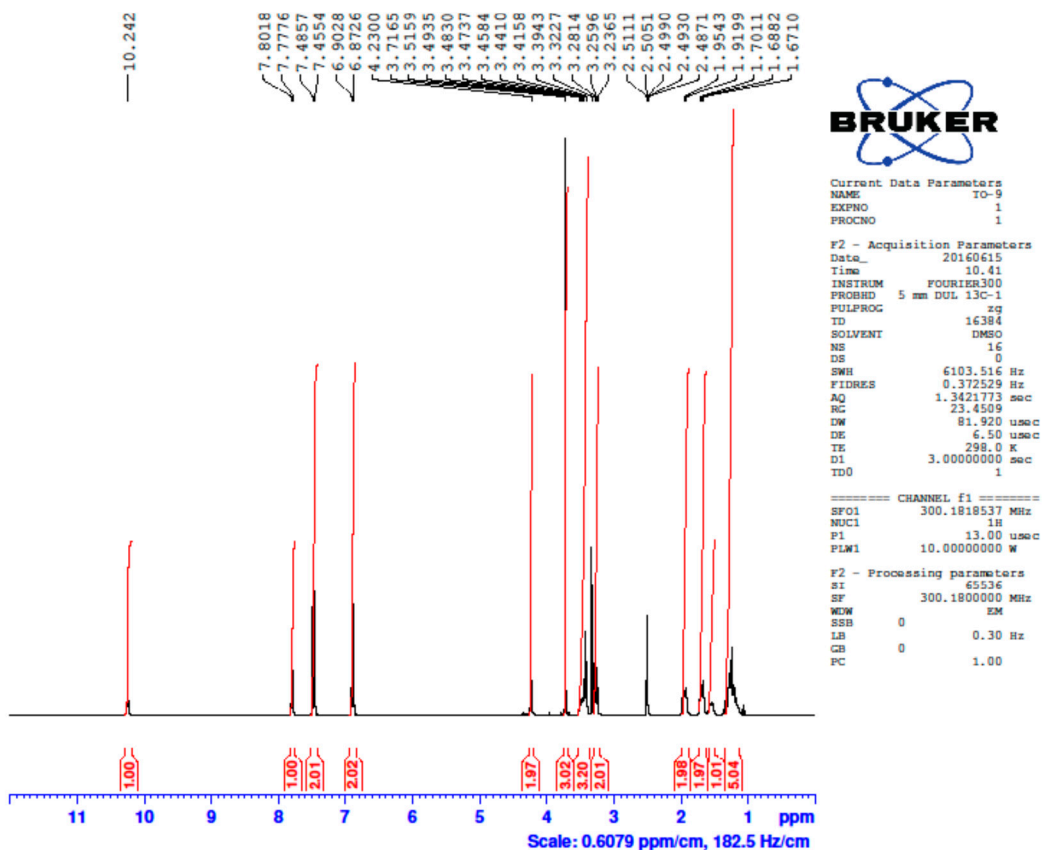

Figure 35. Compound 6i  $^1\text{H}$  NMR spectrum

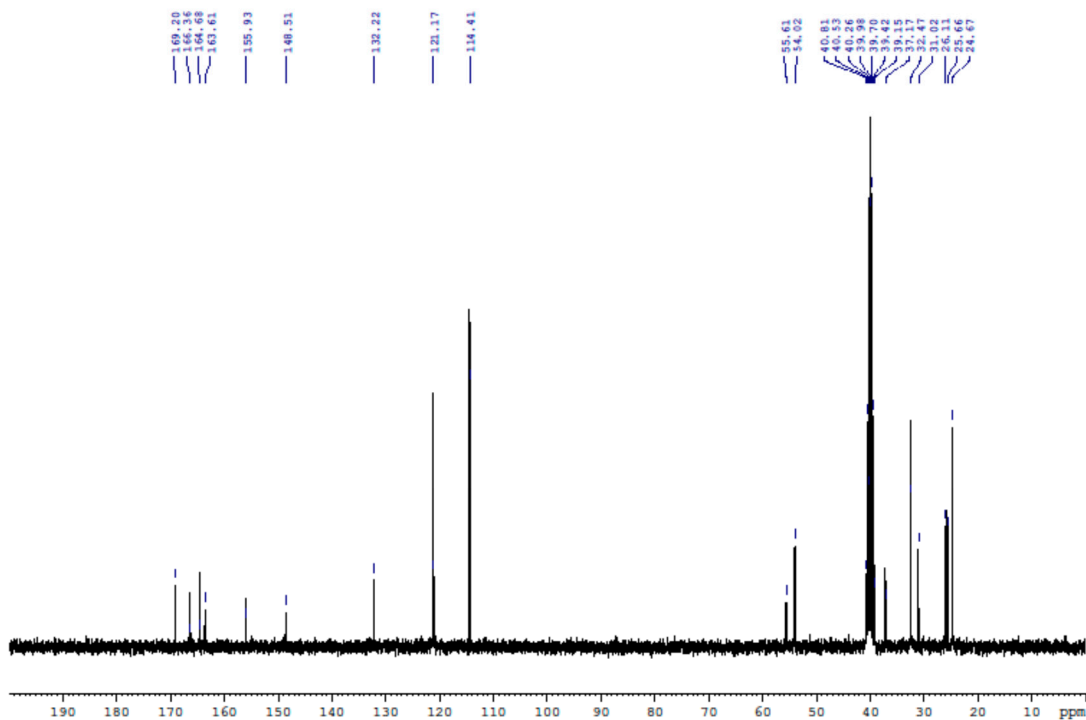

Figure 36. Compound 6i  $^{13}\text{C}$  NMR spectrum

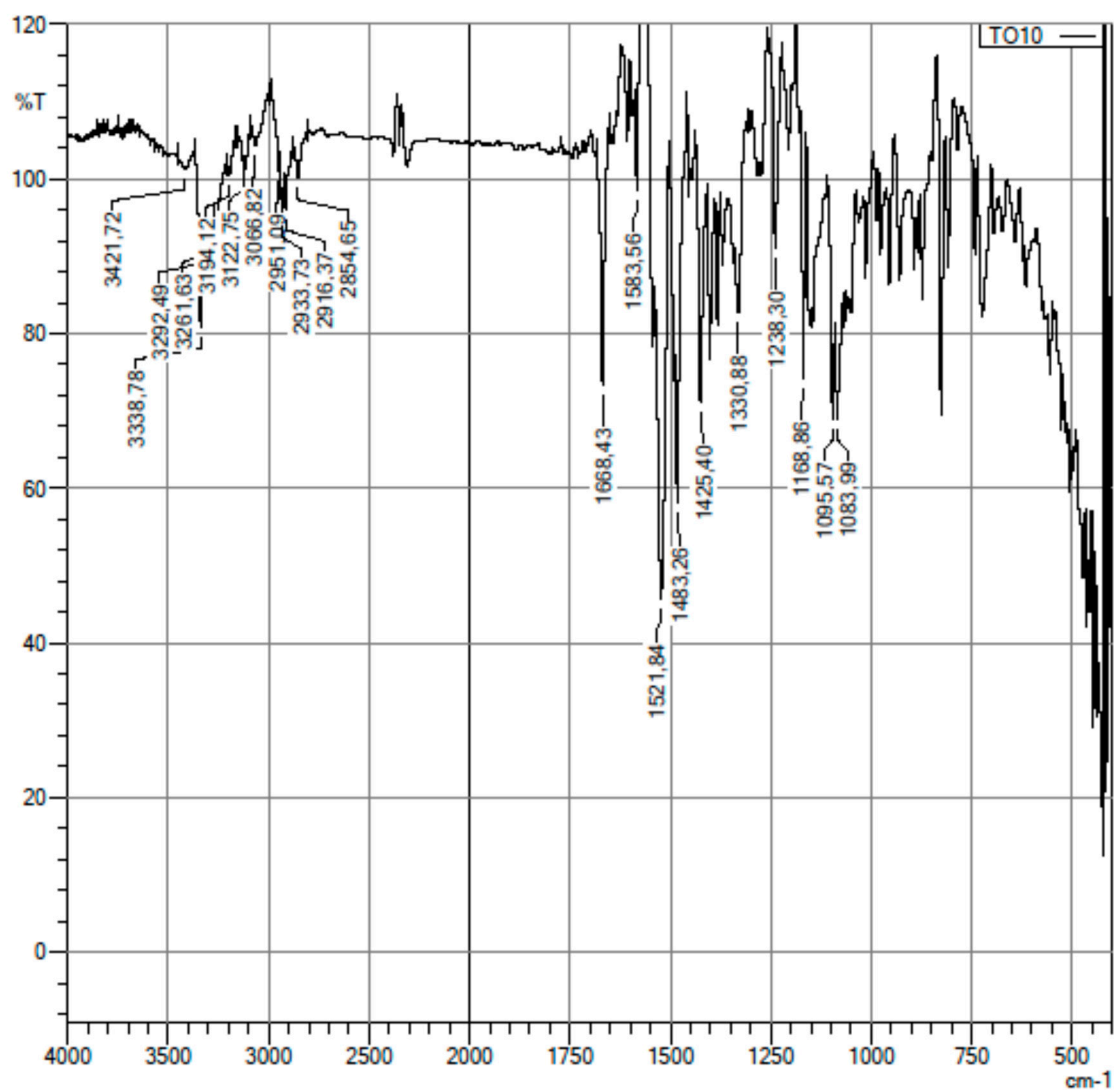

C:\Users\dopnalab\Desktop\BET7L\TO\TO10.ispd

| Item             | Value          |
|------------------|----------------|
| 2 Sample name    | TO-10          |
| 3 Sample ID      |                |
| 4 Option         |                |
| 5 Intensity Mode | %Transmittance |
| 6 Apodization    | Happ-Genzel    |
| 9 No. of Scans   | 10             |

Figure 37. Compound 6j IR spectrum

Data File: C:\LabSolutions\Data\Analiz\BKaya\TO10\_12.lcd

| Elmt | Val. | Min | Max | Elmt | Val. | Min | Max | Elmt | Val. | Min | Max | Use Adduct |
|------|------|-----|-----|------|------|-----|-----|------|------|-----|-----|------------|
| H    | 1    | 10  | 40  | O    | 2    | 2   | 5   | Cl   | 1    | 1   | 1   | H          |
| C    | 4    | 10  | 26  | F    | 1    | 0   | 1   | Br   | 1    | 0   | 0   |            |
| N    | 3    | 5   | 6   | S    | 2    | 3   | 3   |      |      |     |     |            |

Error Margin (ppm): 5  
 HC Ratio: unlimited  
 Max Isotopes: 3  
 MSn Iso RI (%): 10.00

DBE Range: 9.0 - 19.0  
 Apply N Rule: yes  
 Isotope RI (%): 1.00  
 MSn Logic Mode: AND

Electron Ions: both  
 Use MSn Info: no  
 Isotope Res: 10000  
 Max Results: 500

Event#: 1 MS(E+) Ret. Time : 7.787 -> 7.853 Scan# : 1169 -> 1179

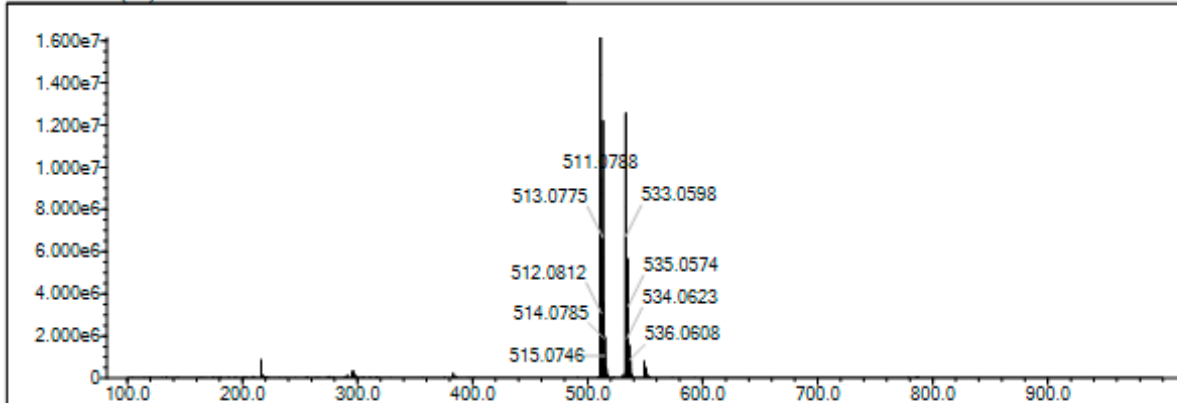

Measured region for 511.0788 m/z

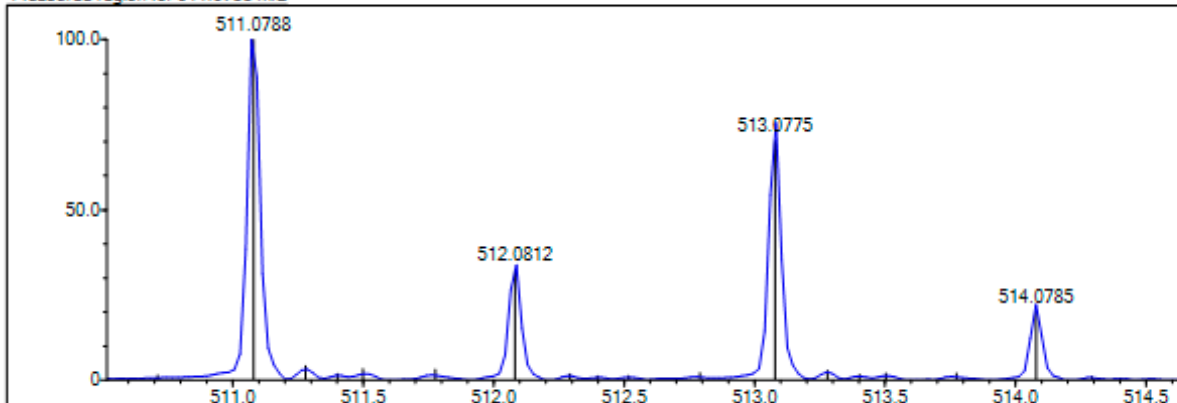

C20 H23 N6 O2 S3 Cl [M+H]<sup>+</sup> : Predicted region for 511.0806 m/z

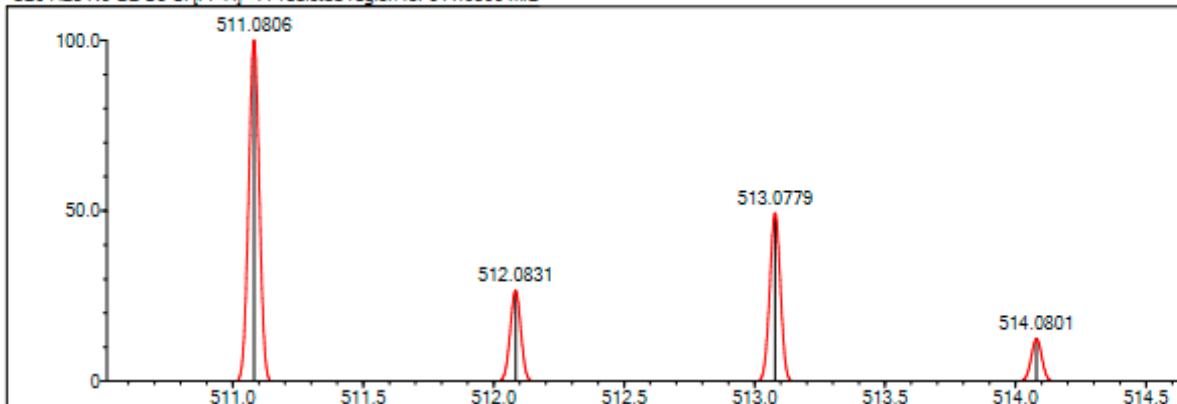

| Rank | Score | Formula (M)         | Ion                | Meas. m/z | Pred. m/z | Df. (mDa) | Df. (ppm) | Iso   | DBE  |
|------|-------|---------------------|--------------------|-----------|-----------|-----------|-----------|-------|------|
| 1    | 53.62 | C20 H23 N6 O2 S3 Cl | [M+H] <sup>+</sup> | 511.0788  | 511.0806  | -1.8      | -3.52     | 57.23 | 12.0 |

Figure 38. Compound 6j Mass spectrum

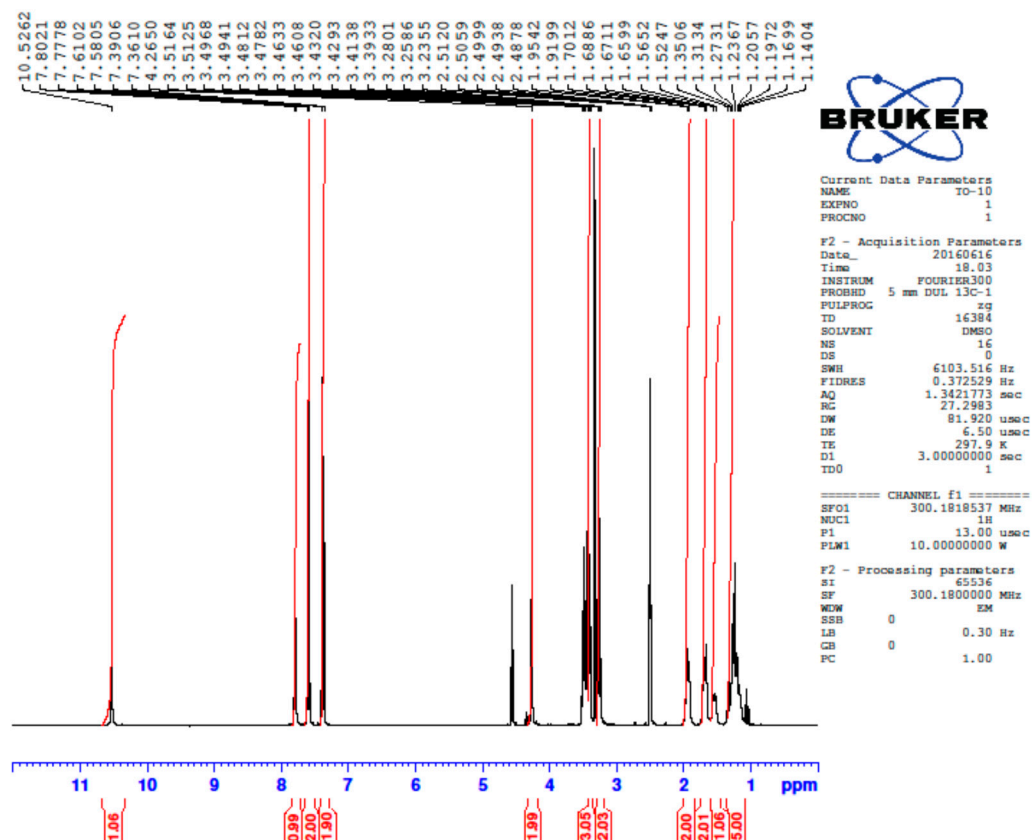

Figure 39. Compound 6j <sup>1</sup>H NMR spectrum

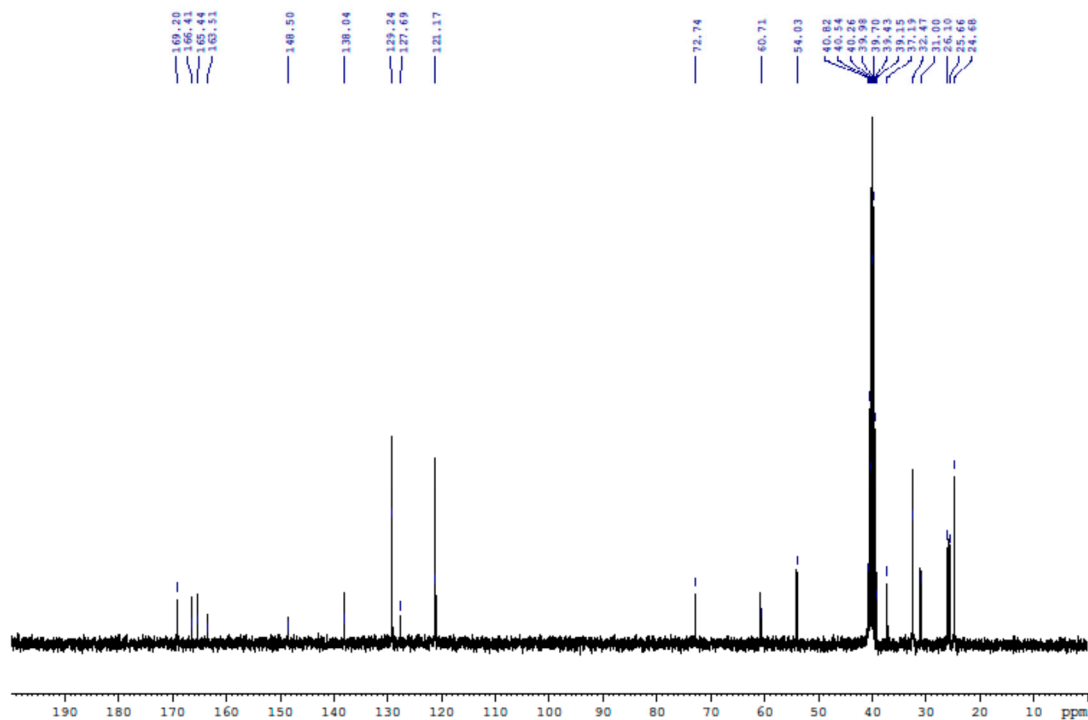

Figure 40. Compound 6j <sup>13</sup>C NMR spectrum

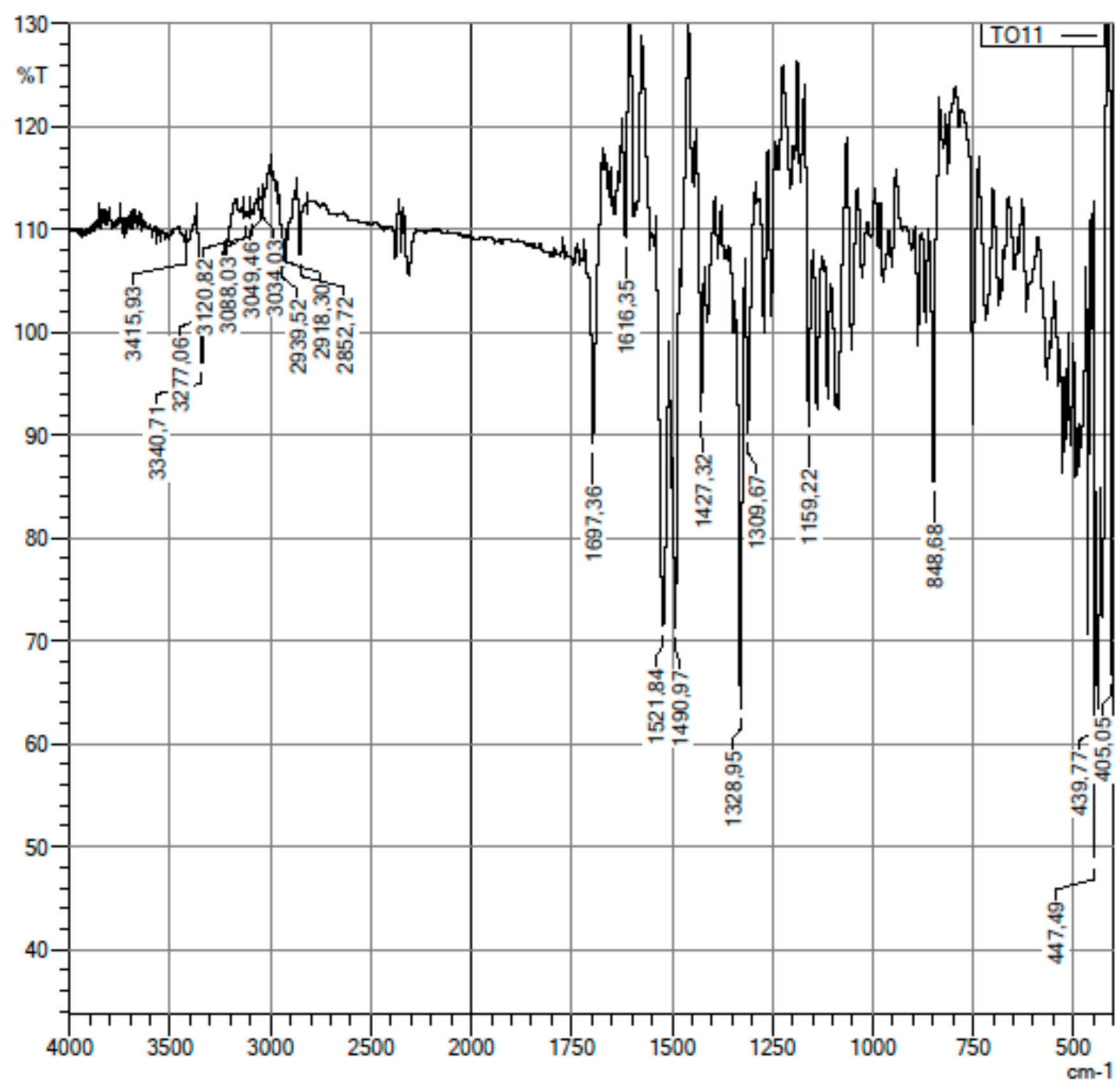

C:\Users\dopnalab\Desktop\BET7L\TO\TO11.ispd

| Item             | Value           |
|------------------|-----------------|
| 2 Sample name    | TO-11           |
| 3 Sample ID      |                 |
| 4 Option         |                 |
| 5 Intensity Mode | % Transmittance |
| 6 Apodization    | Happ-Genzel     |
| 9 No. of Scans   | 10              |

Figure 41. Compound 6k IR spectrum



Data File: C:\LabSolutions\Data\Analiz\BKaya\TO11\_13.lcd

| Elmt | Val. | Min | Max | Elmt | Val. | Min | Max | Elmt | Val. | Min | Max | Use Adduct |
|------|------|-----|-----|------|------|-----|-----|------|------|-----|-----|------------|
| H    | 1    | 10  | 40  | O    | 2    | 2   | 5   | Cl   | 1    | 0   | 0   | H          |
| C    | 4    | 10  | 26  | F    | 1    | 0   | 0   | Br   | 1    | 0   | 0   |            |
| N    | 3    | 7   | 7   | S    | 2    | 3   | 3   |      |      |     |     |            |

Error Margin (ppm): 5  
 HC Ratio: unlimited  
 Max Isotopes: 3  
 MSn Iso RI (%): 10.00

DBE Range: 9.0 - 19.0  
 Apply N Rule: yes  
 Isotope RI (%): 1.00  
 MSn Logic Mode: AND

Electron Ions: both  
 Use MSn Info: no  
 Isotope Res: 10000  
 Max Results: 500

Event#: 1 MS(E+) Ret. Time : 7.547 -> 7.573 Scan# : 1133 -> 1137

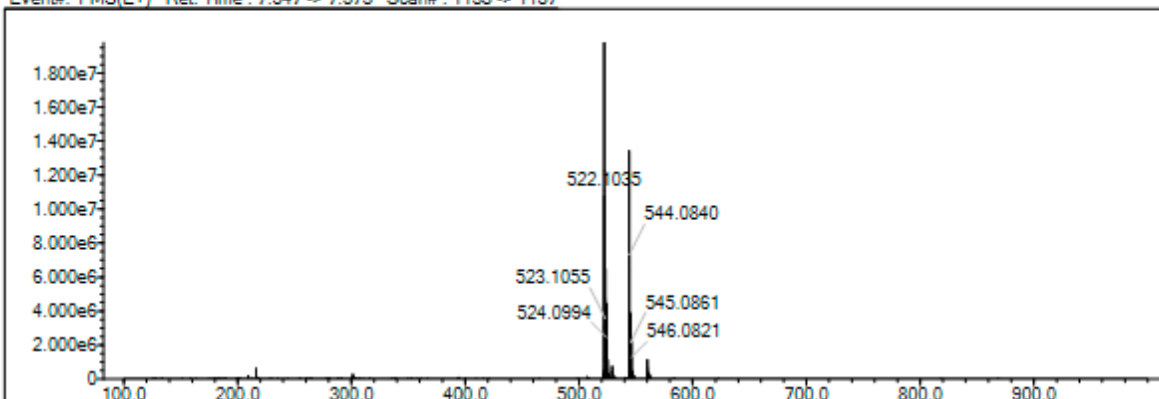

Measured region for 522.1035 m/z

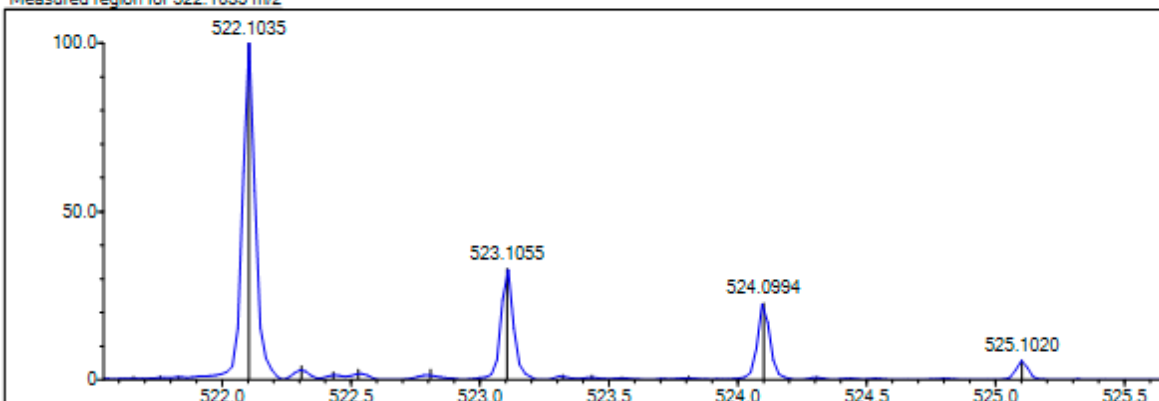

C20 H23 N7 O4 S3 [M+H]<sup>+</sup> : Predicted region for 522.1046 m/z

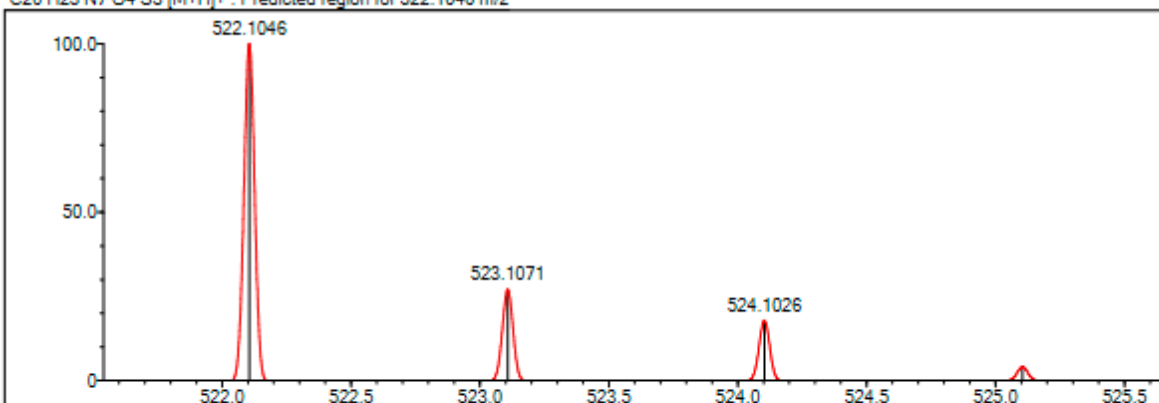

| Rank | Score | Formula (M)      | Ion                | Meas. m/z | Pred. m/z | Df. (mDa) | Df. (ppm) | Iso   | DBE  |
|------|-------|------------------|--------------------|-----------|-----------|-----------|-----------|-------|------|
| 1    | 90.12 | C20 H23 N7 O4 S3 | [M+H] <sup>+</sup> | 522.1035  | 522.1046  | -1.1      | -2.11     | 92.69 | 13.0 |

Figure 42. Compound 6k Mass spectrum

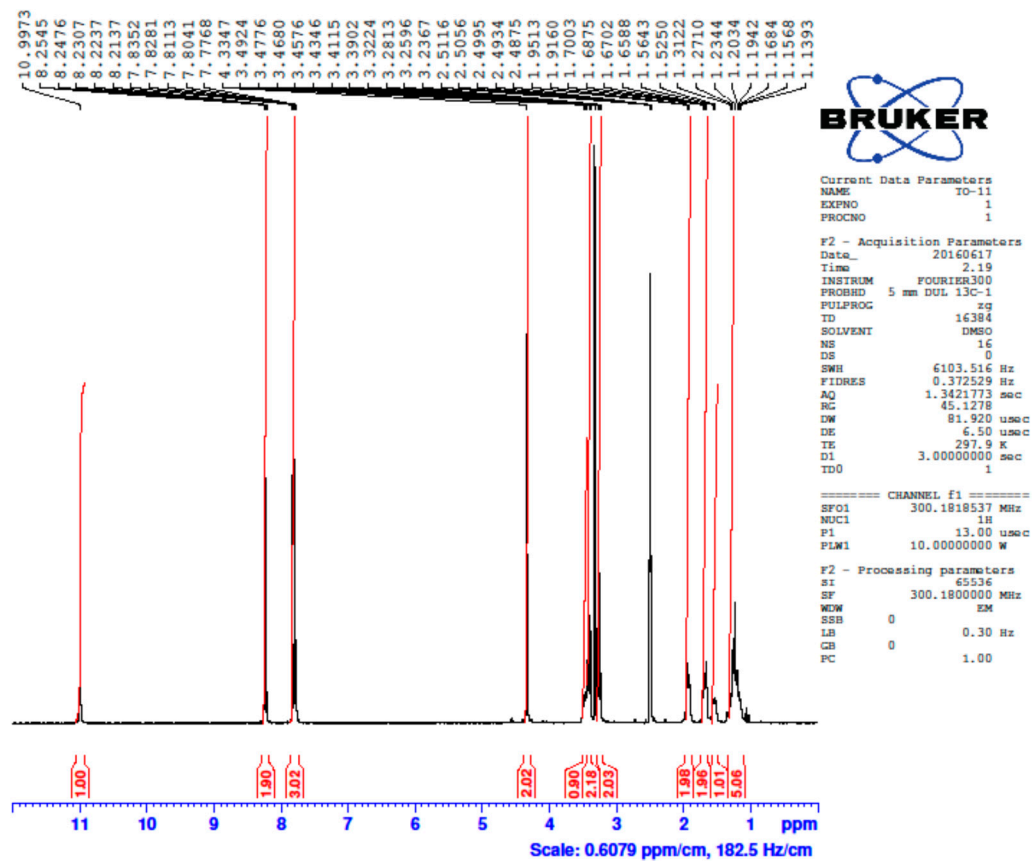

Figure 43. Compound 6k  $^1\text{H}$  NMR spectrum

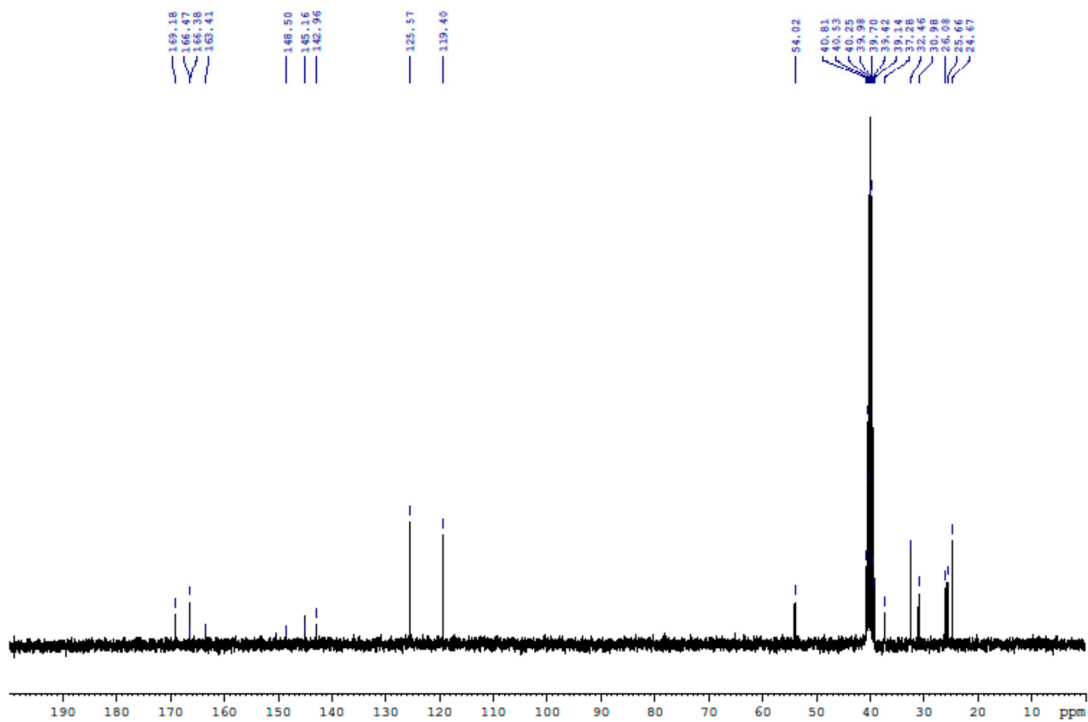

Figure 44. Compound 6k  $^{13}\text{C}$  NMR spectrum

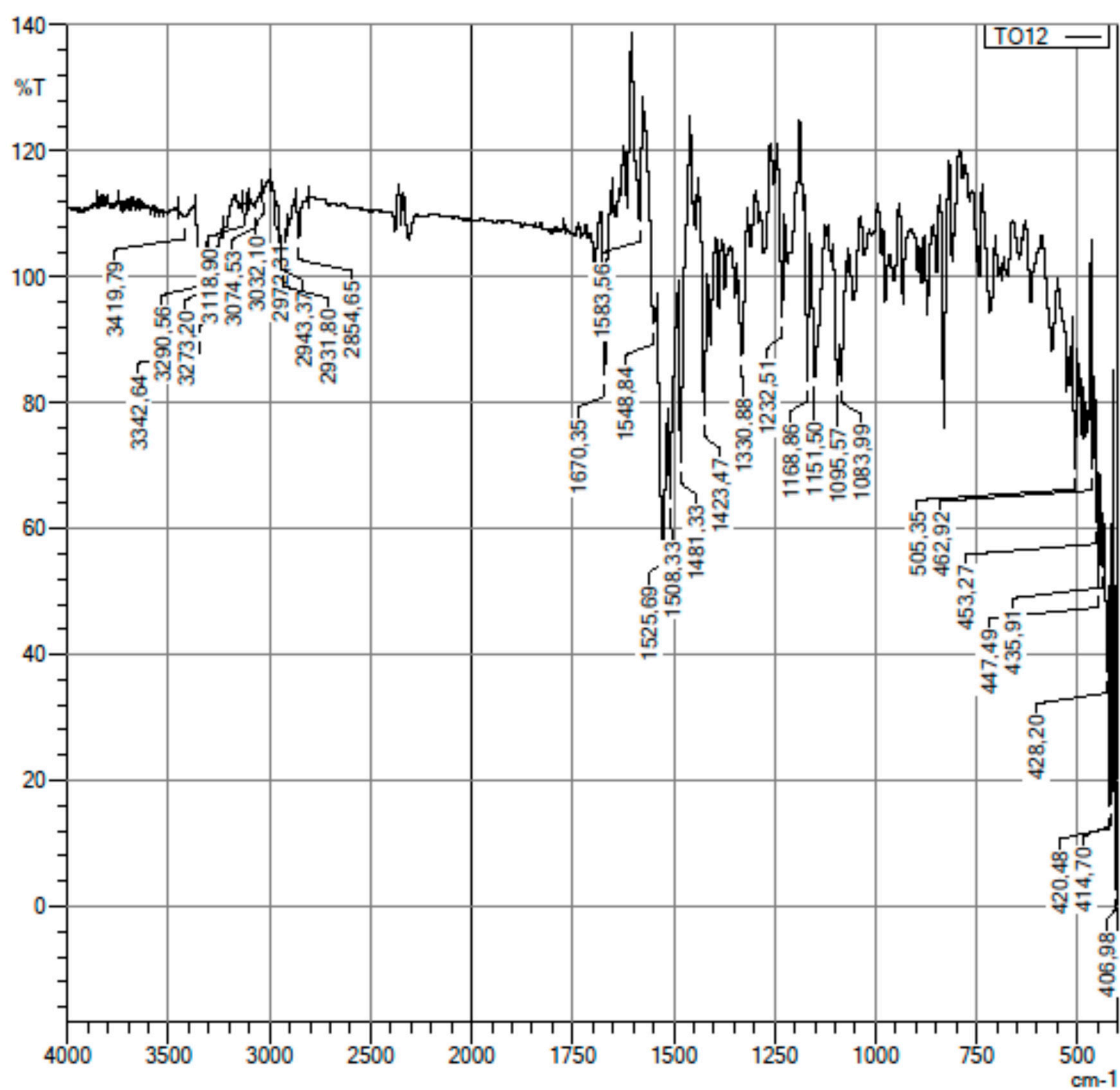

C:\Users\dopnab\Desktop\BET7L\TOWTO12.ispd

|   | Item           | Value           |
|---|----------------|-----------------|
| 2 | Sample name    | TO-12           |
| 3 | Sample ID      |                 |
| 4 | Option         |                 |
| 5 | Intensity Mode | % Transmittance |
| 6 | Apodization    | Happ-Genzel     |
| 9 | No. of Scans   | 10              |

Figure 45. Compound 6l IR spectrum

Data File: C:\LabSolutions\Data\Analiz\BKaya\TO12\_14.Jcd

| Elmt | Val. | Min | Max | Elmt | Val. | Min | Max | Elmt | Val. | Min | Max | Use Adduct |
|------|------|-----|-----|------|------|-----|-----|------|------|-----|-----|------------|
| H    | 1    | 10  | 40  | O    | 2    | 2   | 5   | Cl   | 1    | 0   | 0   | H          |
| C    | 4    | 10  | 26  | F    | 1    | 1   | 1   | Br   | 1    | 0   | 0   |            |
| N    | 3    | 6   | 7   | S    | 2    | 3   | 3   |      |      |     |     |            |

Error Margin (ppm): 5  
 HC Ratio: unlimited  
 Max Isotopes: 3  
 MSn Iso RI (%): 10.00

DBE Range: 9.0 - 19.0  
 Apply N Rule: yes  
 Isotope RI (%): 1.00  
 MSn Logic Mode: AND

Electron Ions: both  
 Use MSn Info: no  
 Isotope Res: 10000  
 Max Results: 500

Event#: 1 MS(E+) Ret. Time : 7.493 -> 7.520 Scan#: 1125 -> 1129

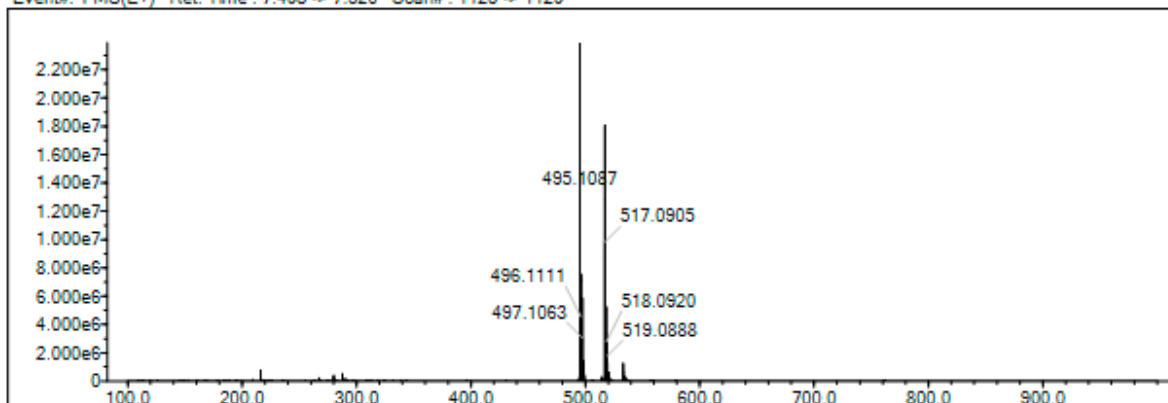

Measured region for 495.1087 m/z

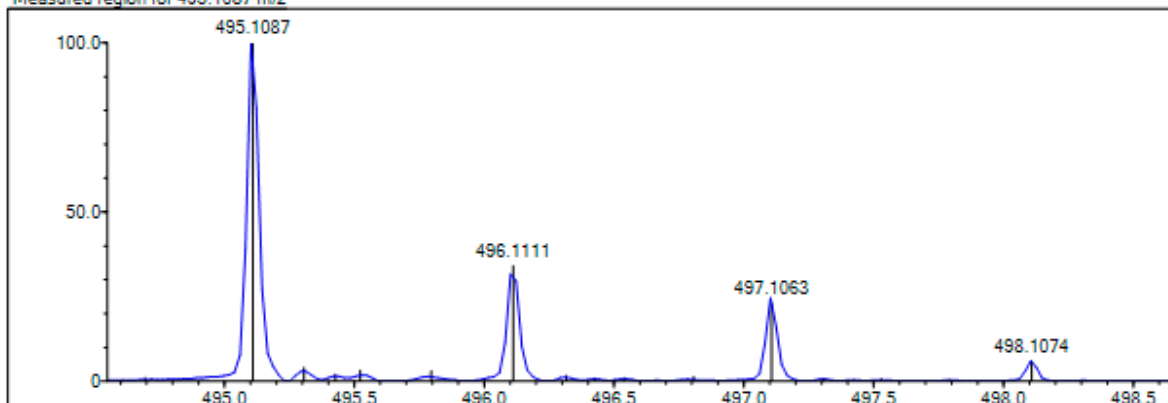

C20 H23 N6 O2 F S3 [M+H]+ : Predicted region for 495.1101 m/z

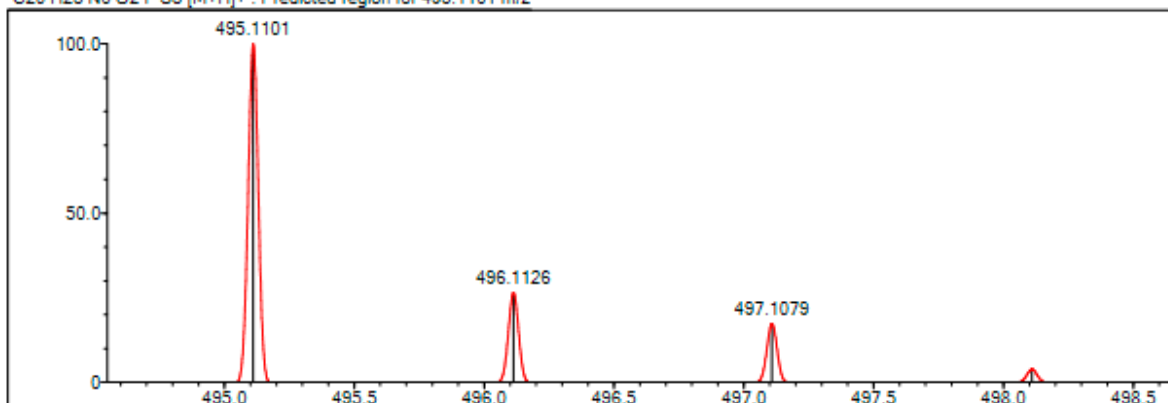

| Rank | Score | Formula (M)        | Ion    | Meas. m/z | Pred. m/z | Df. (mDa) | Df. (ppm) | Iso   | DBE  |
|------|-------|--------------------|--------|-----------|-----------|-----------|-----------|-------|------|
| 1    | 76.00 | C20 H23 N6 O2 F S3 | [M+H]+ | 495.1087  | 495.1101  | -1.4      | -2.83     | 79.64 | 12.0 |

Figure 46. Compound 6l Mass spectrum

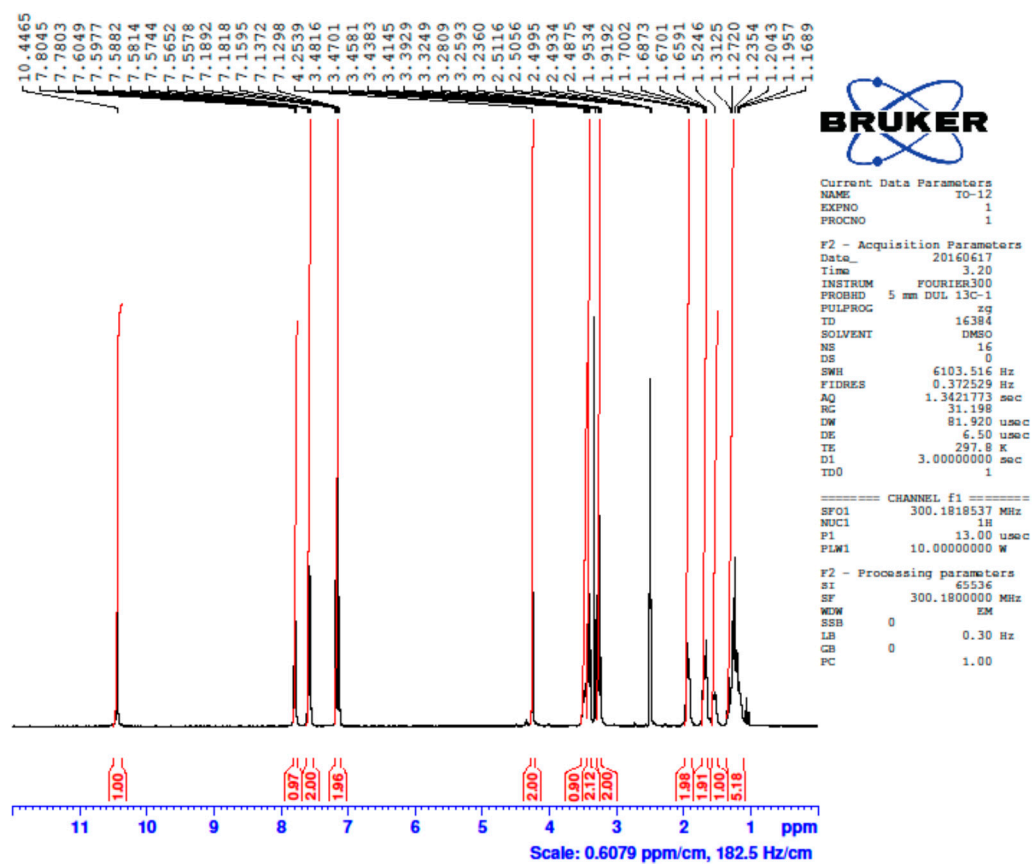

Figure 47. Compound 6l  $^1\text{H}$  NMR spectrum

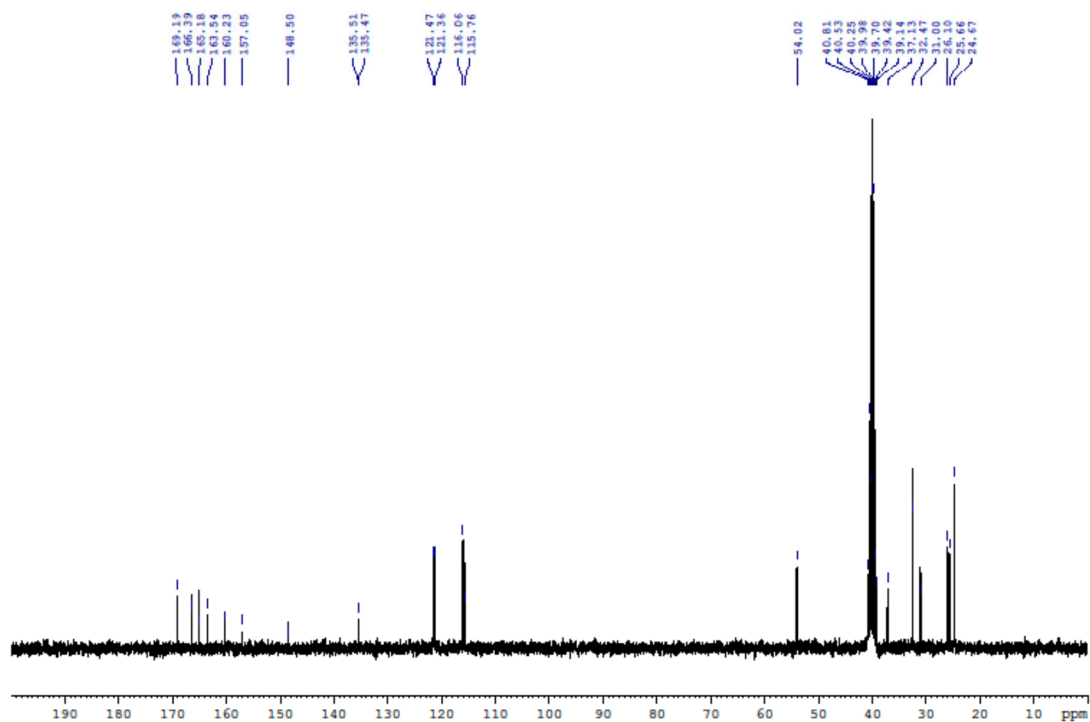

Figure 48. Compound 6l  $^{13}\text{C}$  NMR spectrum

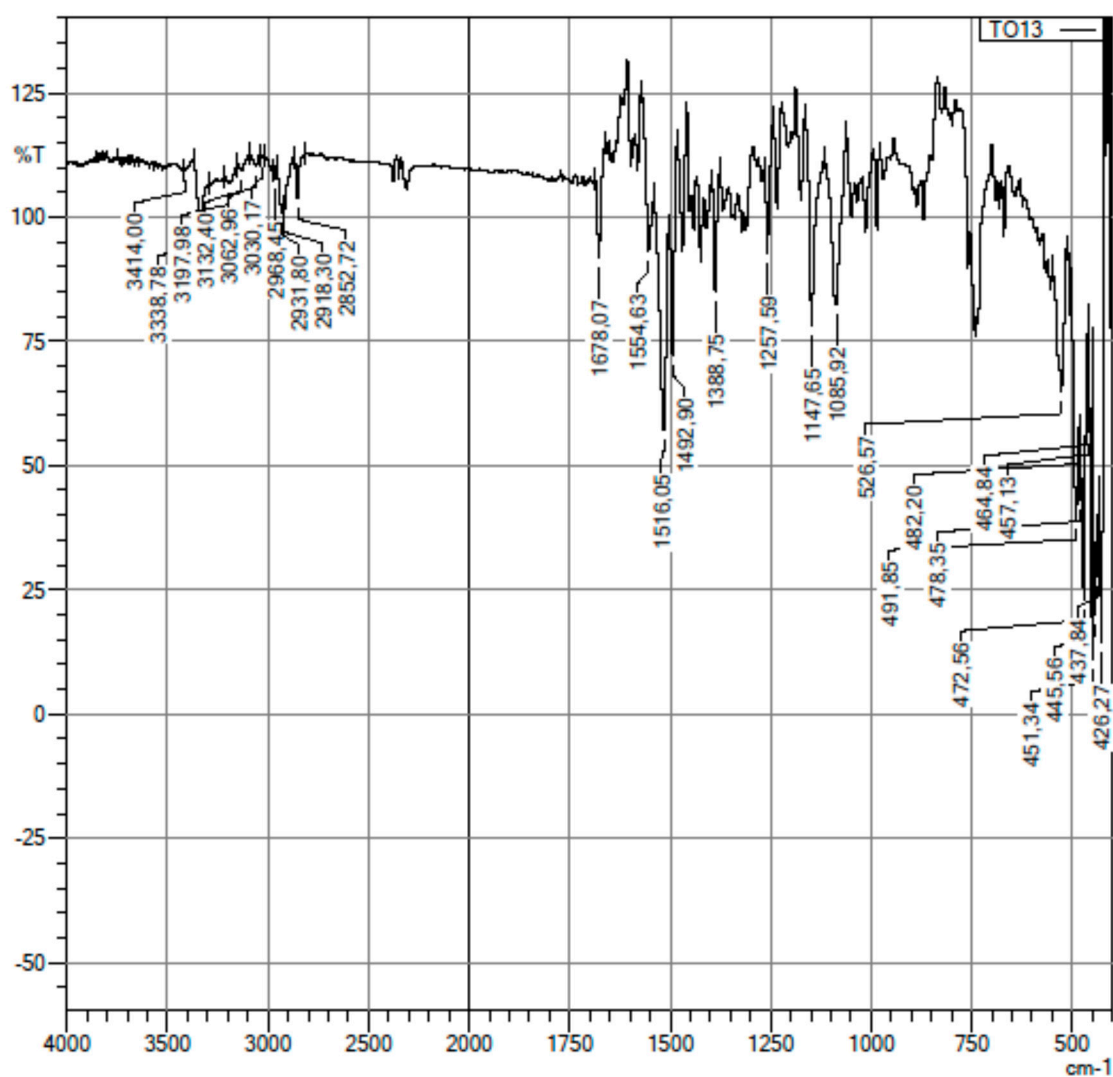

C:\Users\dopnab\Desktop\BET7L\TO\TO13.ispd

|   | Item           | Value          |
|---|----------------|----------------|
| 2 | Sample name    | TO-13          |
| 3 | Sample ID      |                |
| 4 | Option         |                |
| 5 | Intensity Mode | %Transmittance |
| 6 | Apodization    | Happ-Genzel    |
| 9 | No. of Scans   | 10             |

Figure 49. Compound 6m IR spectrum

Data File: C:\LabSolutions\Data\Analiz\BKaya\TO13\_15.lcd

| Elmt | Val. | Min | Max | Elmt | Val. | Min | Max | Elmt | Val. | Min | Max | Use Adduct |
|------|------|-----|-----|------|------|-----|-----|------|------|-----|-----|------------|
| H    | 1    | 10  | 40  | O    | 2    | 2   | 5   | Cl   | 1    | 0   | 0   | H          |
| C    | 4    | 10  | 26  | F    | 1    | 0   | 0   | Br   | 1    | 0   | 0   |            |
| N    | 3    | 7   | 7   | S    | 2    | 4   | 4   |      |      |     |     |            |

Error Margin (ppm): 5  
 HC Ratio: unlimited  
 Max Isotopes: 3  
 MSn Iso RI (%): 10.00

DBE Range: 9.0 - 19.0  
 Apply N Rule: yes  
 Isotope RI (%): 1.00  
 MSn Logic Mode: AND

Electron Ions: both  
 Use MSn Info: no  
 Isotope Res: 10000  
 Max Results: 500

Event#: 1 MS(E+) Ret. Time : 7.720 -> 7.907 Scan#: 1159 -> 1187

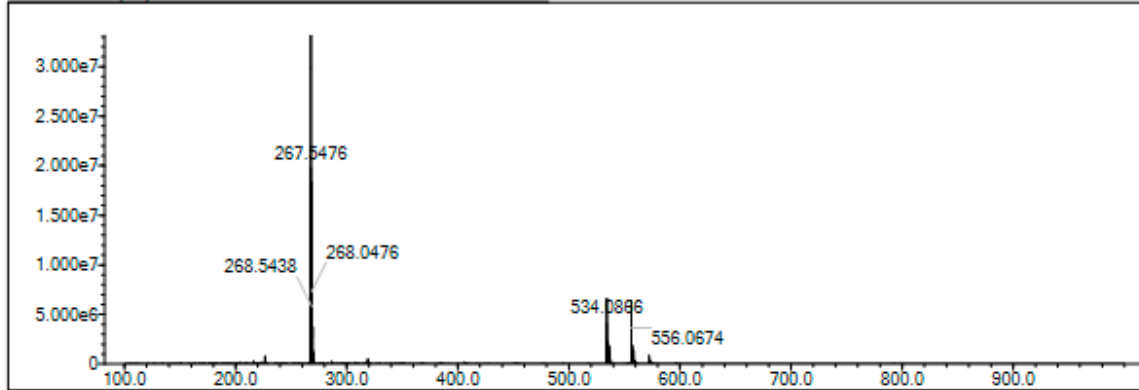

Measured region for 534.0866 m/z

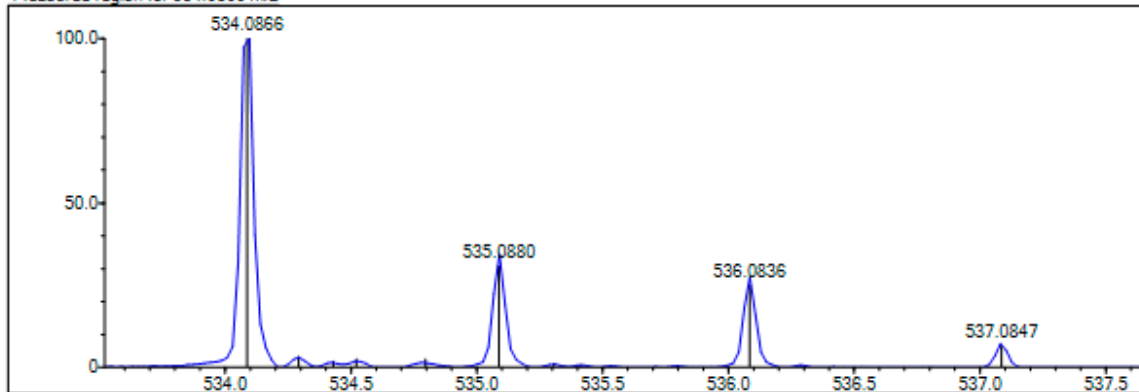

C21 H23 N7 O2 S4 [M+H]+ : Predicted region for 534.0869 m/z

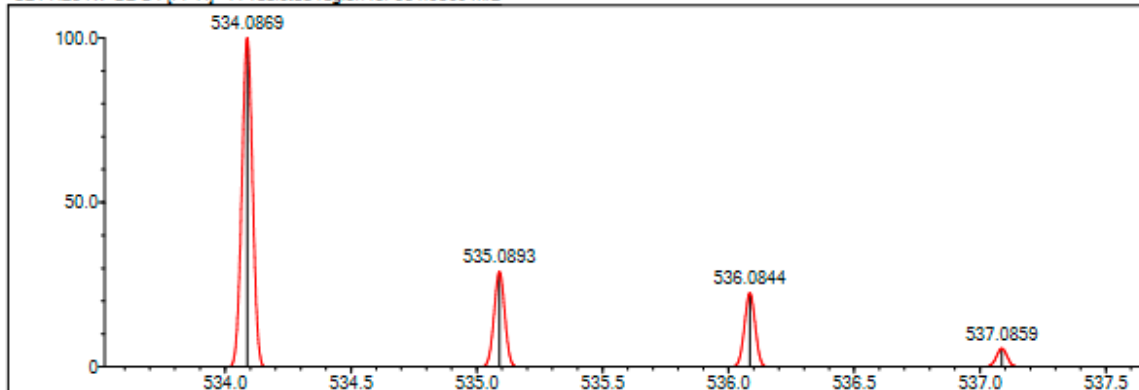

| Rank | Score | Formula (M)      | Ion                | Meas. m/z | Pred. m/z | Df. (mDa) | Df. (ppm) | Iso   | DBE  |
|------|-------|------------------|--------------------|-----------|-----------|-----------|-----------|-------|------|
| 1    | 86.50 | C21 H23 N7 O2 S4 | [M+H] <sup>+</sup> | 534.0866  | 534.0869  | -0.3      | -0.56     | 86.50 | 14.0 |

Figure 50. Compound 6m Mass spectrum

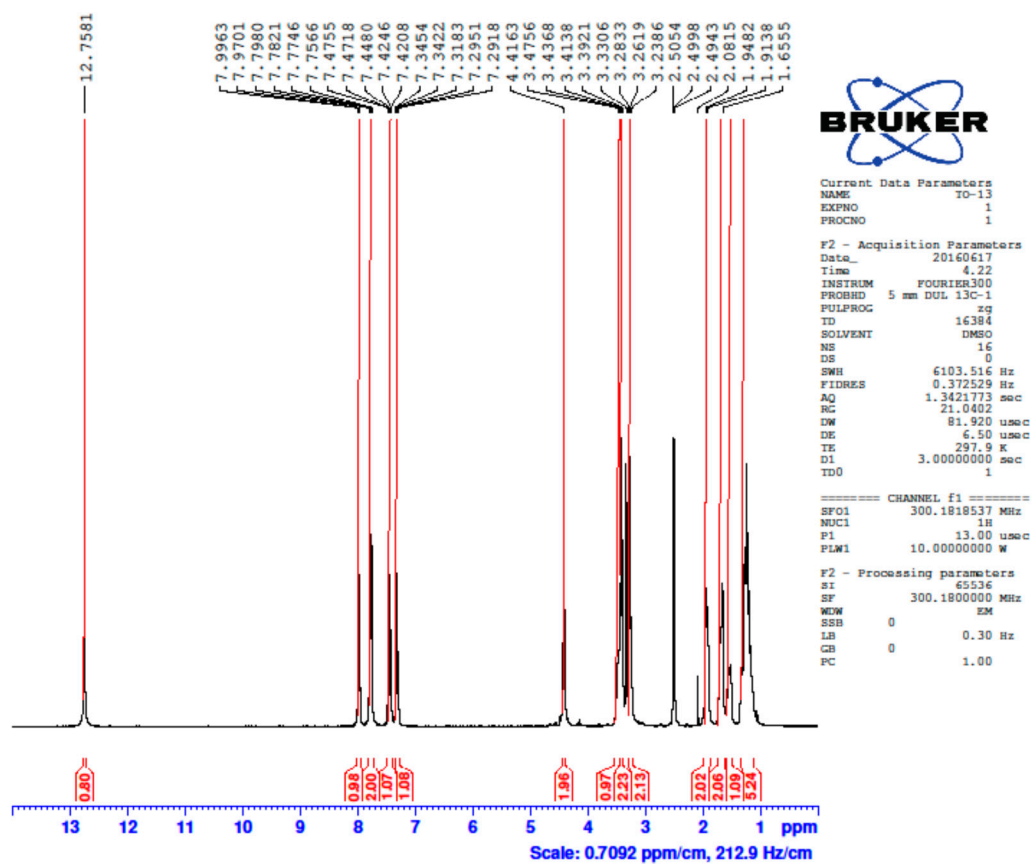

Figure 51. Compound 6m <sup>1</sup>H NMR spectrum

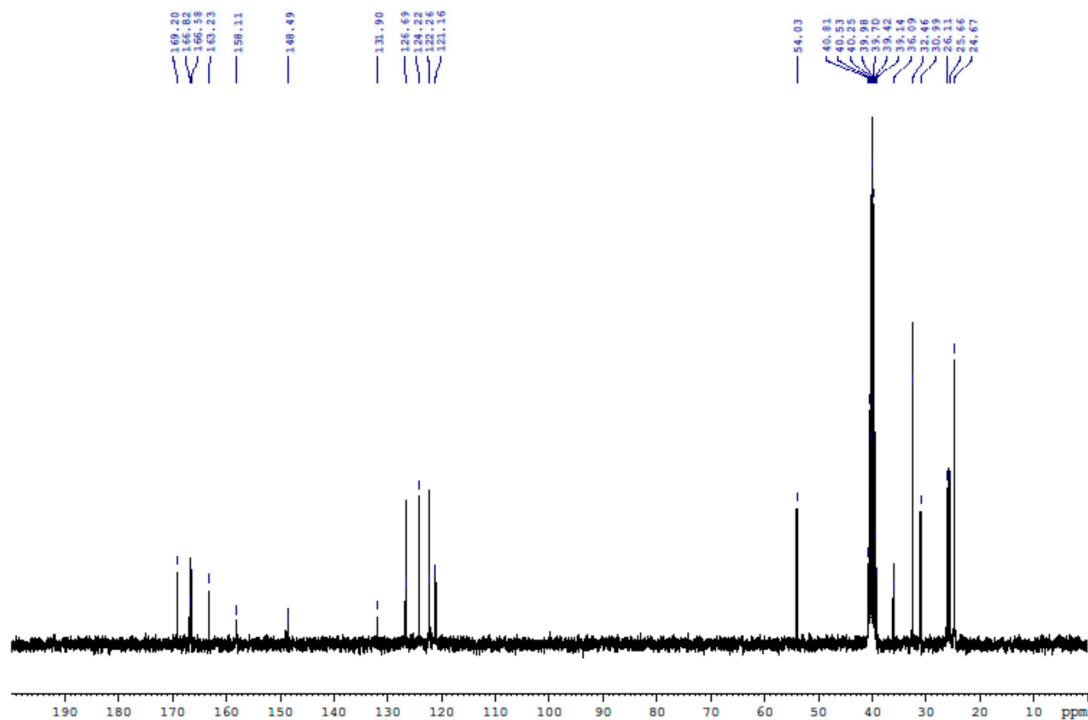

Figure 52. Compound 6m <sup>13</sup>C NMR spectrum



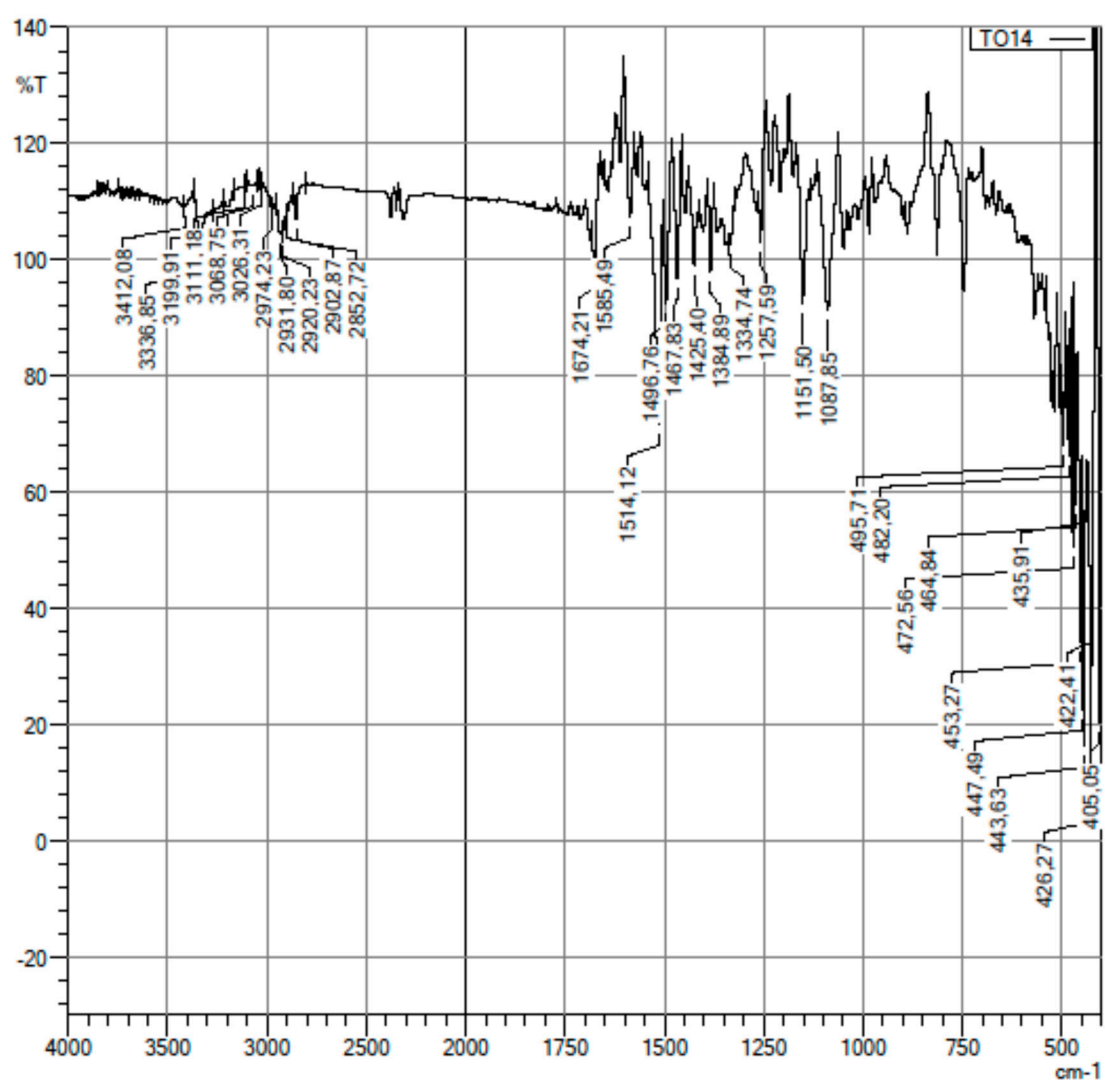

C:\Users\dopnalab\Desktop\BET7\LYTO\TO14.ispd

|   | Item           | Value          |
|---|----------------|----------------|
| 2 | Sample name    | TO-14          |
| 3 | Sample ID      |                |
| 4 | Option         |                |
| 5 | Intensity Mode | %Transmittance |
| 6 | Apodization    | Happ-Genzel    |
| 9 | No. of Scans   | 10             |

Figure 53. Compound 6n IR spectrum

Data File: C:\LabSolutions\Data\Analiz\BKaya\TO14\_16.lcd

| Elmt | Val. | Min | Max | Elmt | Val. | Min | Max | Elmt | Val. | Min | Max | Use Adduct |
|------|------|-----|-----|------|------|-----|-----|------|------|-----|-----|------------|
| H    | 1    | 10  | 40  | O    | 2    | 2   | 5   | Cl   | 1    | 0   | 0   | H          |
| C    | 4    | 10  | 26  | F    | 1    | 0   | 0   | Br   | 1    | 0   | 0   |            |
| N    | 3    | 7   | 7   | S    | 2    | 4   | 4   |      |      |     |     |            |

Error Margin (ppm): 5  
 HC Ratio: unlimited  
 Max Isotopes: 3  
 MSn Iso RI (%): 10.00

DBE Range: 9.0 - 19.0  
 Apply N Rule: yes  
 Isotope RI (%): 1.00  
 MSn Logic Mode: AND

Electron Ions: both  
 Use MSn Info: no  
 Isotope Res: 10000  
 Max Results: 500

Event#: 1 MS(E+) Ret. Time : 8.000 -> 8.147 Scan#: 1201 -> 1223

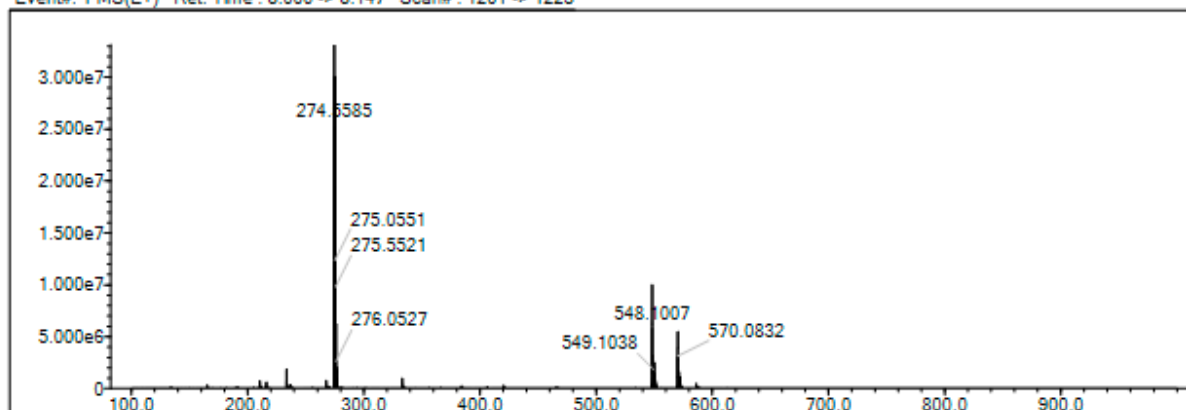

Measured region for 548.1007 m/z

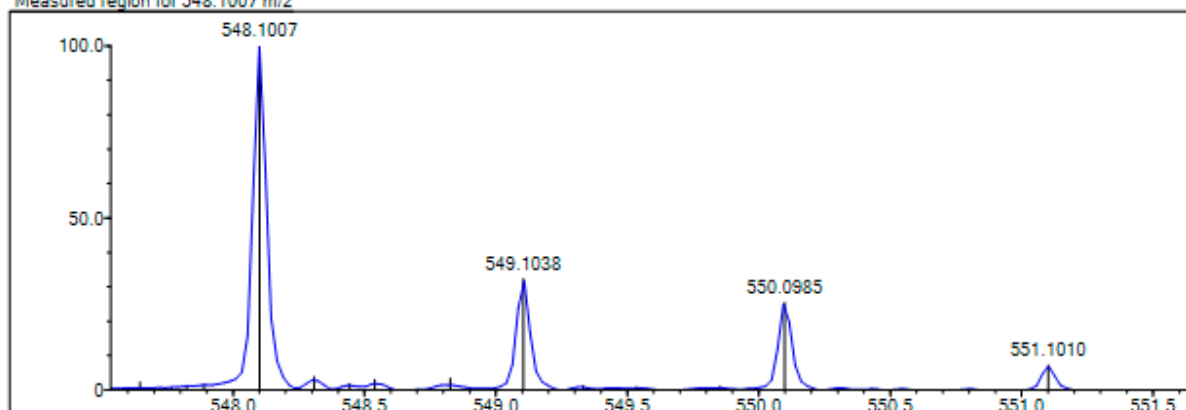

C22 H25 N7 O2 S4 [M+H]+ : Predicted region for 548.1025 m/z

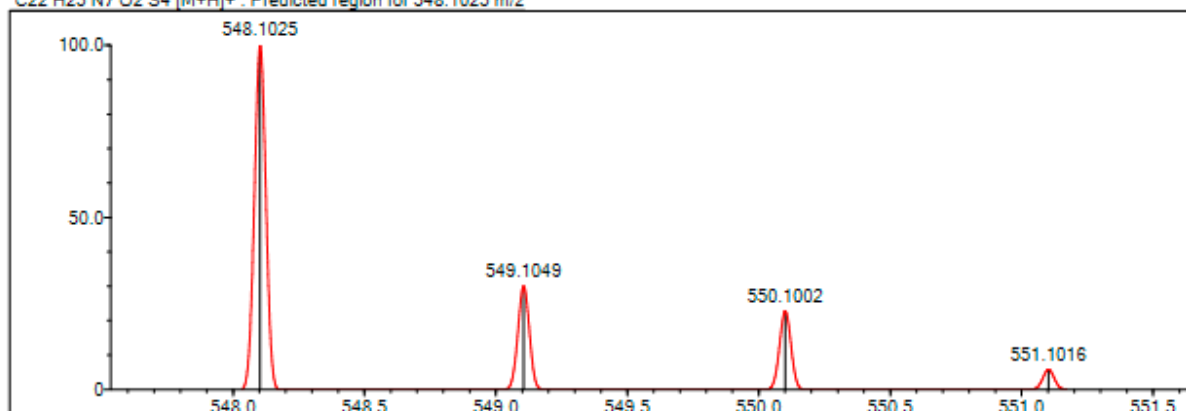

| Rank | Score | Formula (M)      | Ion                | Meas. m/z | Pred. m/z | Df. (mDa) | Df. (ppm) | Iso   | DBE  |
|------|-------|------------------|--------------------|-----------|-----------|-----------|-----------|-------|------|
| 1    | 91.18 | C22 H25 N7 O2 S4 | [M+H] <sup>+</sup> | 548.1007  | 548.1025  | -1.8      | -3.28     | 96.69 | 14.0 |

Figure 54. Compound 6n Mass spectrum

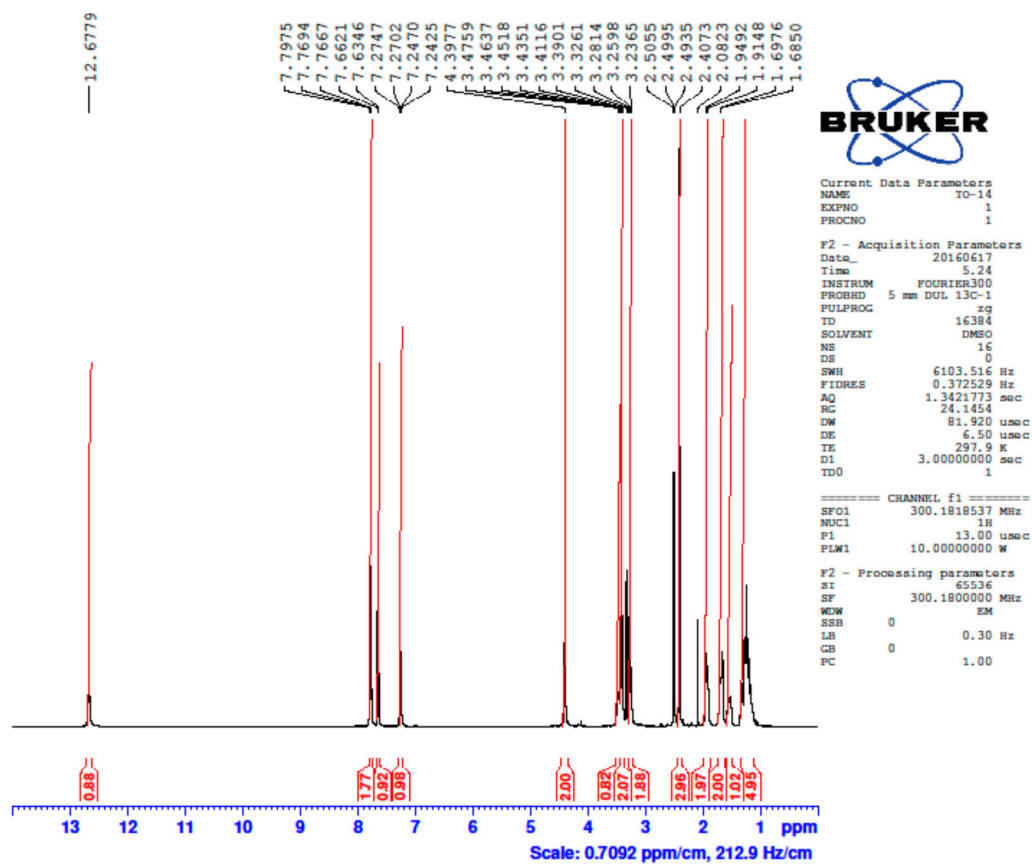

Figure 55. Compound 6n <sup>1</sup>H NMR spectrum

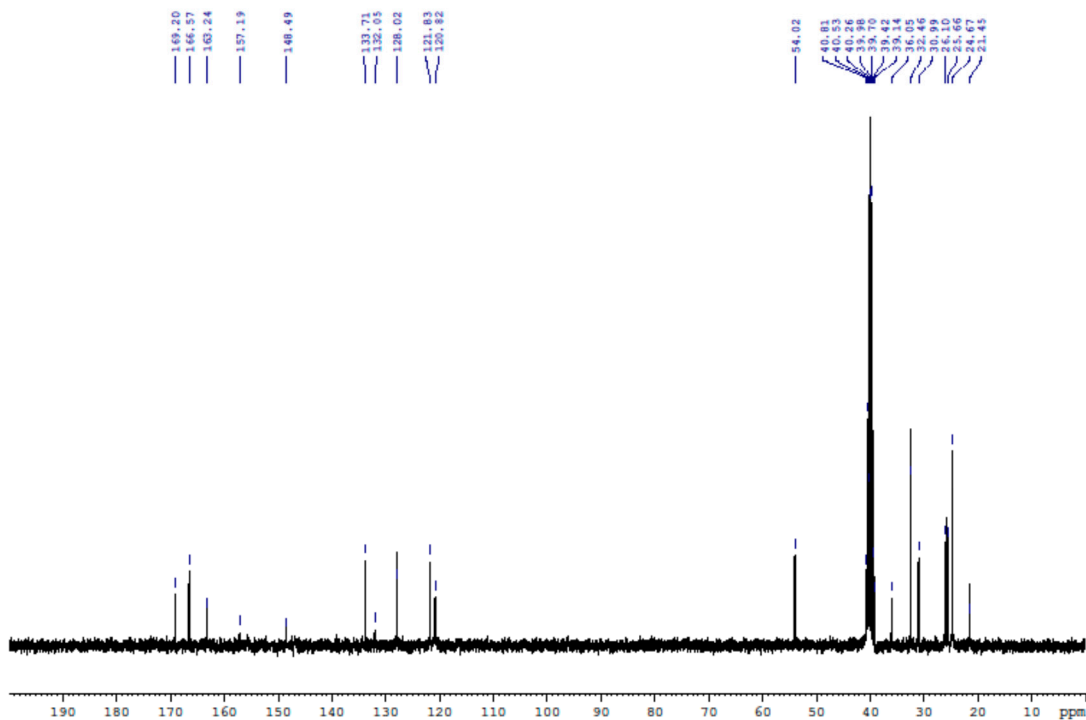

Figure 56. Compound 6n <sup>13</sup>C NMR spectrum

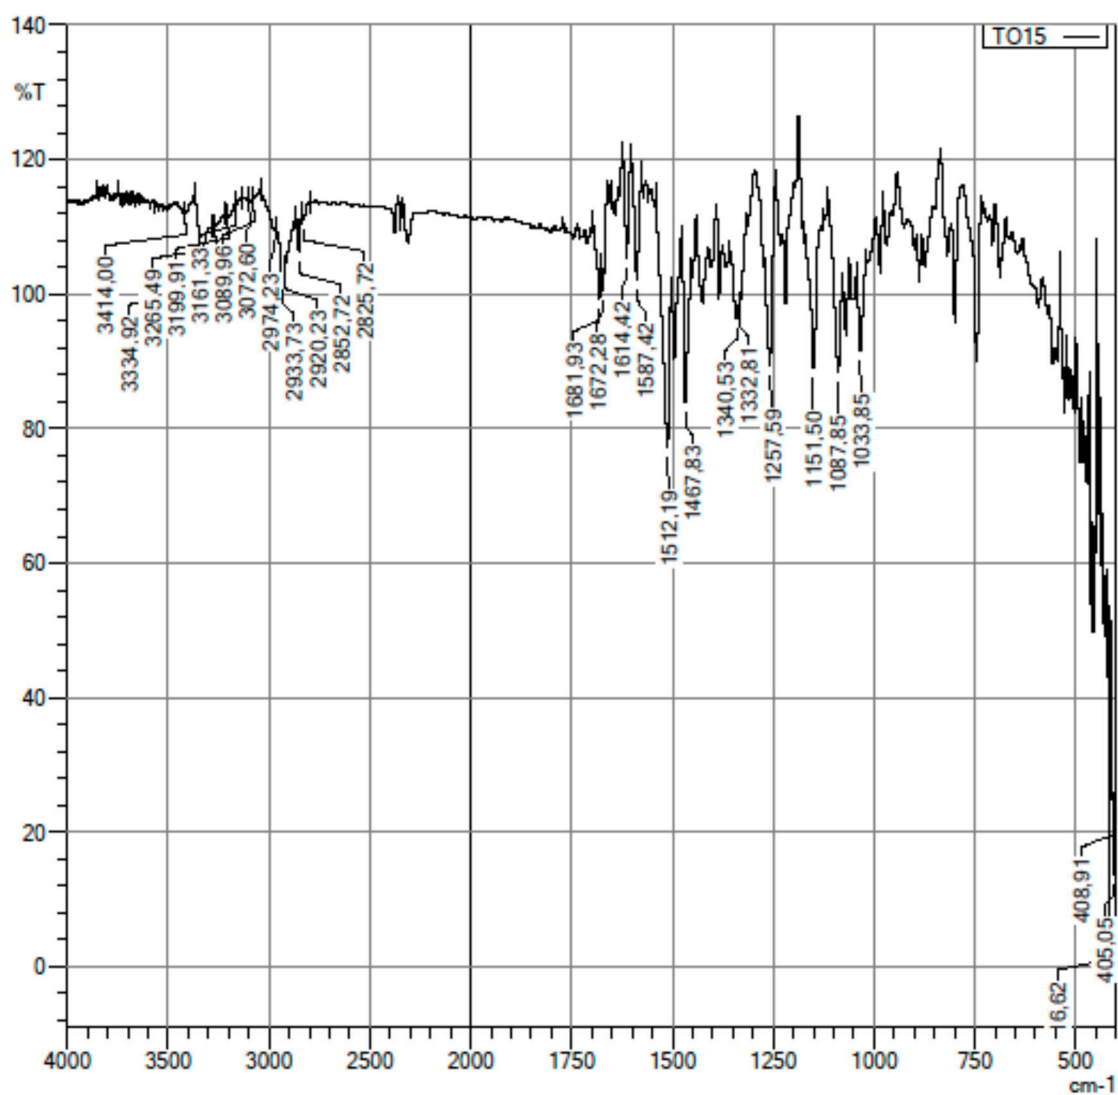

C:\Users\dopnolab\Desktop\WBET7\LTOW\TO15.ispd

|   | Item           | Value           |
|---|----------------|-----------------|
| 2 | Sample name    | TO-15           |
| 3 | Sample ID      |                 |
| 4 | Option         |                 |
| 5 | Intensity Mode | % Transmittance |
| 6 | Apodization    | Happ-Genzel     |
| 9 | No. of Scans   | 10              |

Figure 57. Compound 60 IR spectrum

Data File: C:\LabSolutions\Data\Analiz\BKaya\TO15\_17.lcd

| Elmt | Val. | Min | Max | Elmt | Val. | Min | Max | Elmt | Val. | Min | Max | Use Adduct |
|------|------|-----|-----|------|------|-----|-----|------|------|-----|-----|------------|
| H    | 1    | 10  | 40  | O    | 2    | 2   | 5   | Cl   | 1    | 0   | 0   | H          |
| C    | 4    | 10  | 26  | F    | 1    | 0   | 0   | Br   | 1    | 0   | 0   |            |
| N    | 3    | 7   | 7   | S    | 2    | 4   | 4   |      |      |     |     |            |

Error Margin (ppm): 5  
 HC Ratio: unlimited  
 Max Isotopes: 3  
 MSn Iso RI (%): 10.00

DBE Range: 9.0 - 19.0  
 Apply N Rule: yes  
 Isotope RI (%): 1.00  
 MSn Logic Mode: AND

Electron Ions: both  
 Use MSn Info: no  
 Isotope Res: 10000  
 Max Results: 500

Event#: 1 MS(E+) Ret. Time : 7.653 -> 7.693 Scan#: 1149 -> 1155

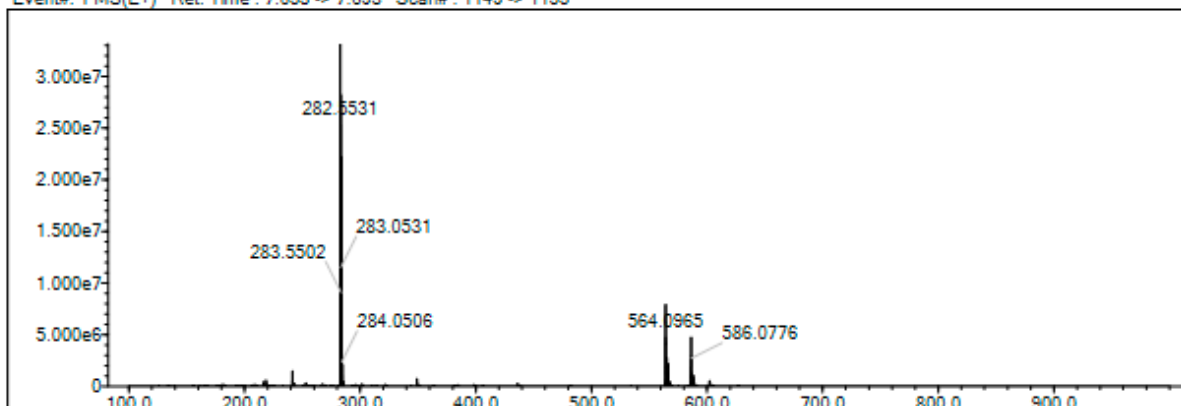

Measured region for 564.0965 m/z

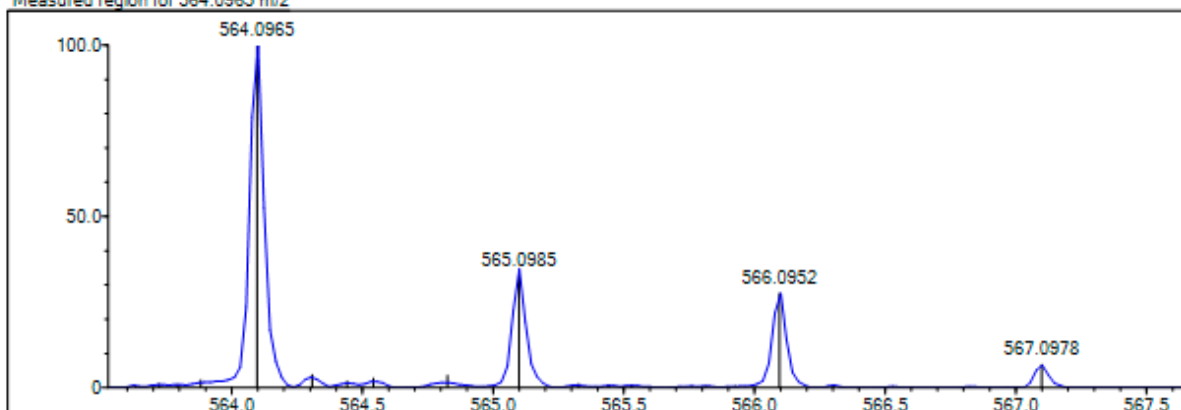

C22 H25 N7 O3 S4 [M+H]<sup>+</sup> : Predicted region for 564.0974 m/z

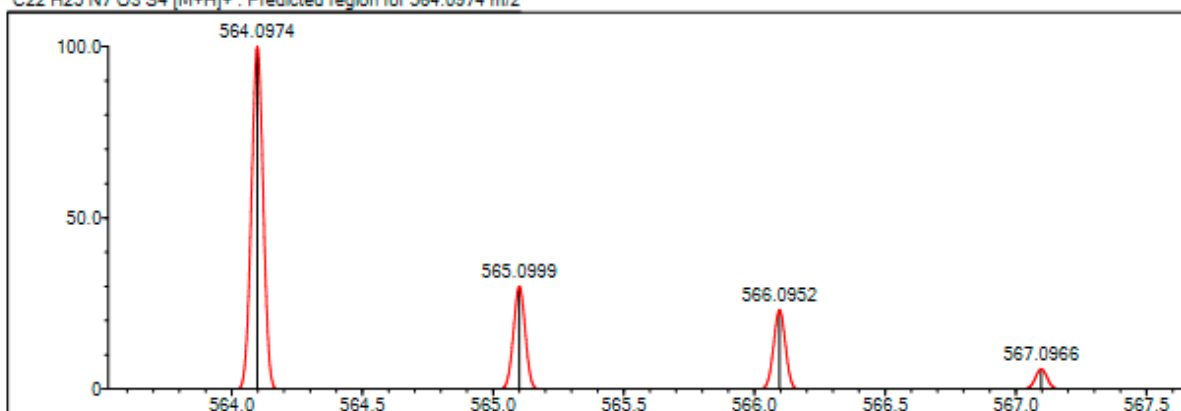

| Rank | Score | Formula (M)      | Ion                | Meas. m/z | Pred. m/z | Df. (mDa) | Df. (ppm) | Iso   | DBE  |
|------|-------|------------------|--------------------|-----------|-----------|-----------|-----------|-------|------|
| 1    | 90.08 | C22 H25 N7 O3 S4 | [M+H] <sup>+</sup> | 564.0965  | 564.0974  | -0.9      | -1.60     | 91.45 | 14.0 |

Figure 58. Compound 6o Mass spectrum

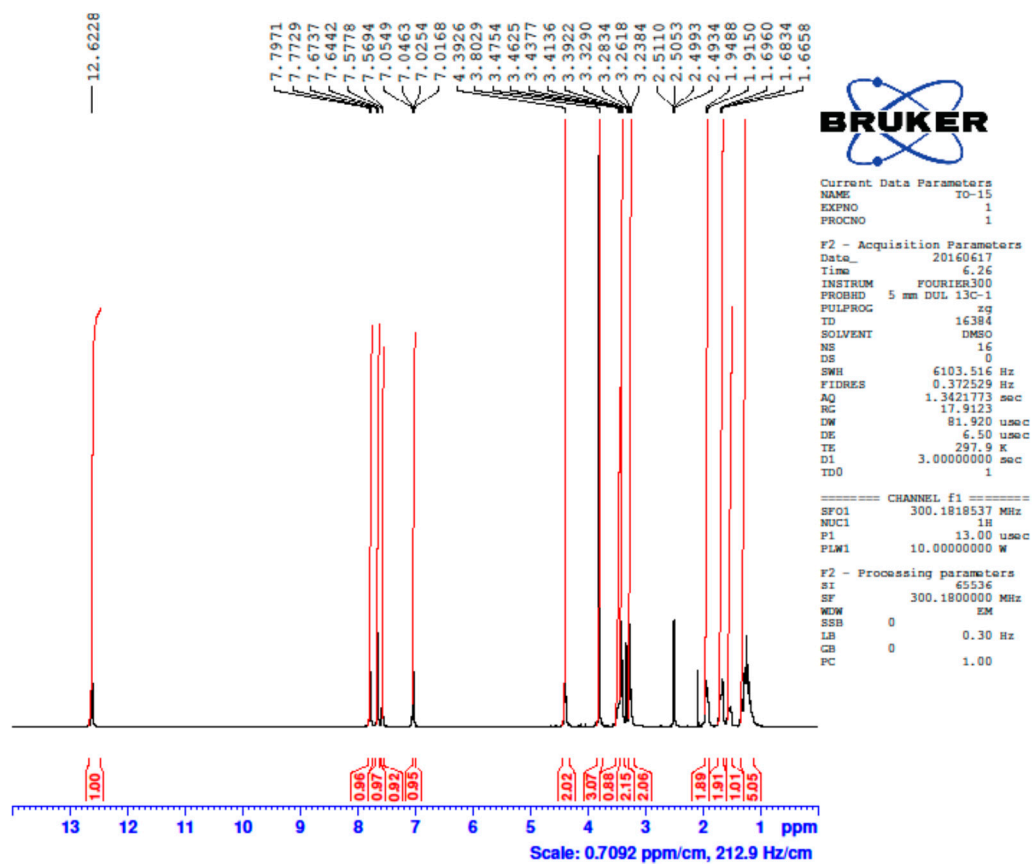

Figure 59. Compound 6o <sup>1</sup>H NMR spectrum

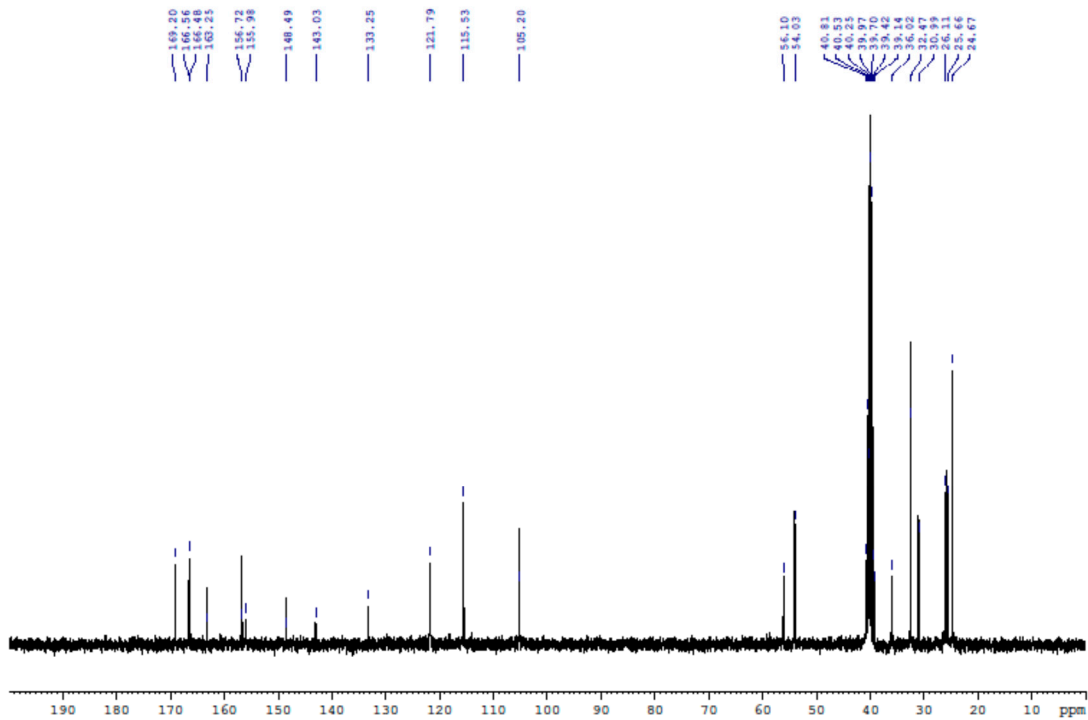

Figure 60. Compound 6o <sup>13</sup>C NMR spectrum

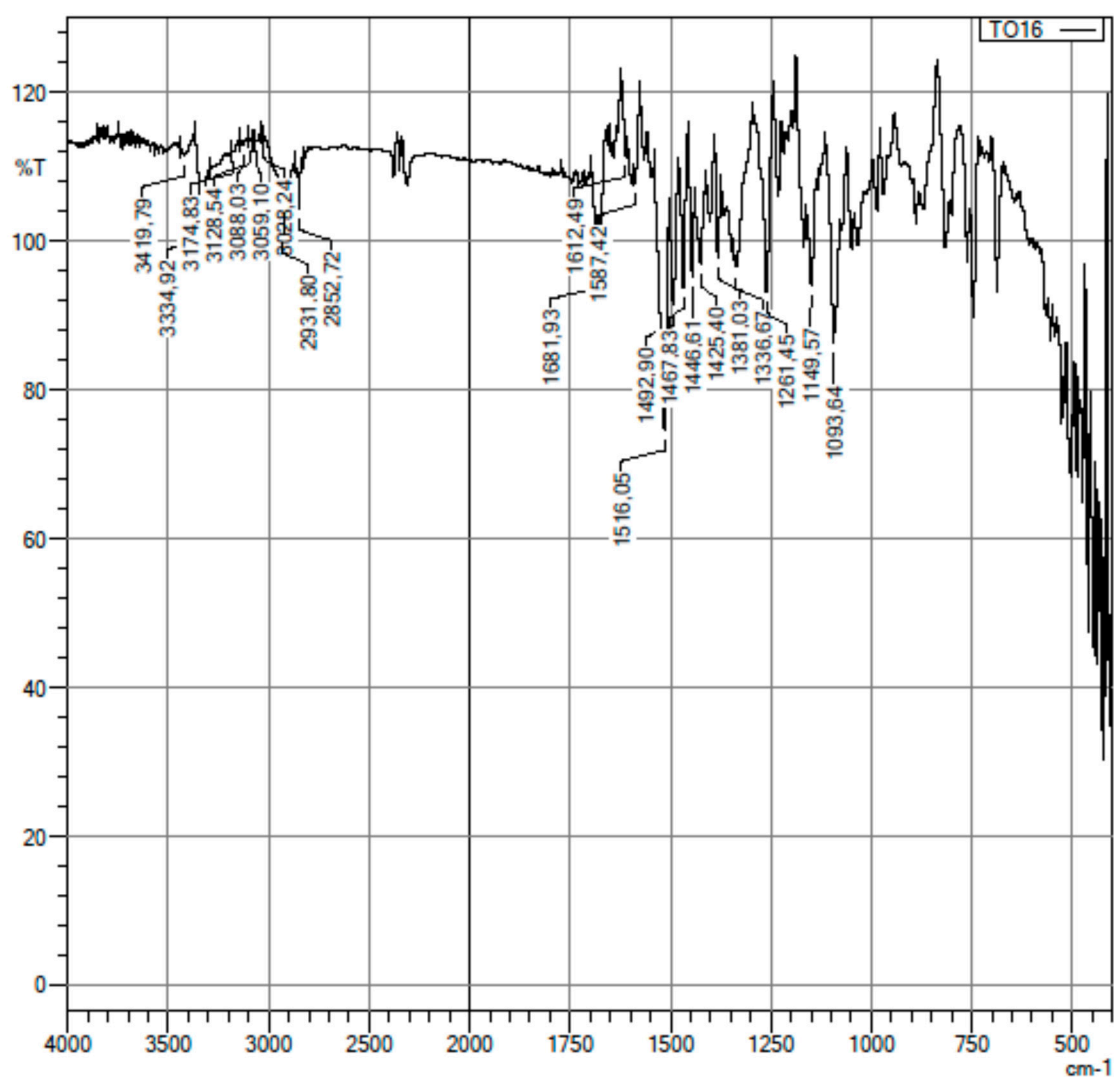

C:\Users\dopnolab\Desktop\BET7L\TO\TO16.ispd

|   | Item           | Value          |
|---|----------------|----------------|
| 2 | Sample name    | TO-16          |
| 3 | Sample ID      |                |
| 4 | Option         |                |
| 5 | Intensity Mode | %Transmittance |
| 6 | Apodization    | Happ-Genzel    |
| 9 | No. of Scans   | 10             |

Figure 61. Compound 6p IR spectrum

Data File: C:\LabSolutions\Data\Analiz\BKaya\TO16\_18.lcd

| Elmt | Val. | Min | Max | Elmt | Val. | Min | Max | Elmt | Val. | Min | Max | Use Adduct |
|------|------|-----|-----|------|------|-----|-----|------|------|-----|-----|------------|
| H    | 1    | 10  | 40  | O    | 2    | 2   | 5   | Cl   | 1    | 1   | 1   | H          |
| C    | 4    | 10  | 26  | F    | 1    | 0   | 0   | Br   | 1    | 0   | 0   |            |
| N    | 3    | 7   | 7   | S    | 2    | 4   | 4   |      |      |     |     |            |

Error Margin (ppm): 5  
 HC Ratio: unlimited  
 Max Isotopes: 3  
 MSn Iso RI (%): 10.00

DBE Range: 9.0 - 19.0  
 Apply N Rule: yes  
 Isotope RI (%): 1.00  
 MSn Logic Mode: AND

Electron Ions: both  
 Use MSn Info: no  
 Isotope Res: 10000  
 Max Results: 500

Event#: 1 MS(E+) Ret. Time : 8.853 -> 8.960 Scan#: 1329 -> 1345

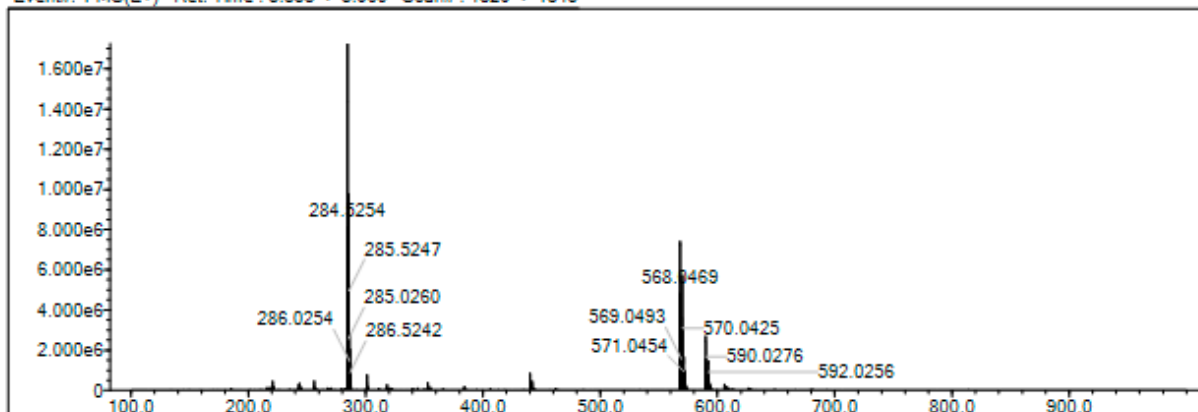

Measured region for 568.0469 m/z

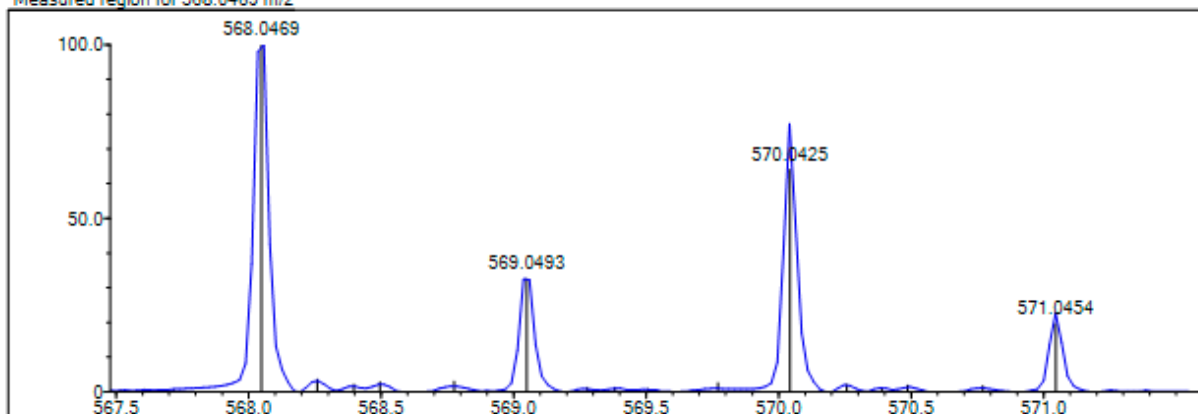

C21 H22 N7 O2 S4 Cl [M+H]<sup>+</sup> : Predicted region for 568.0479 m/z

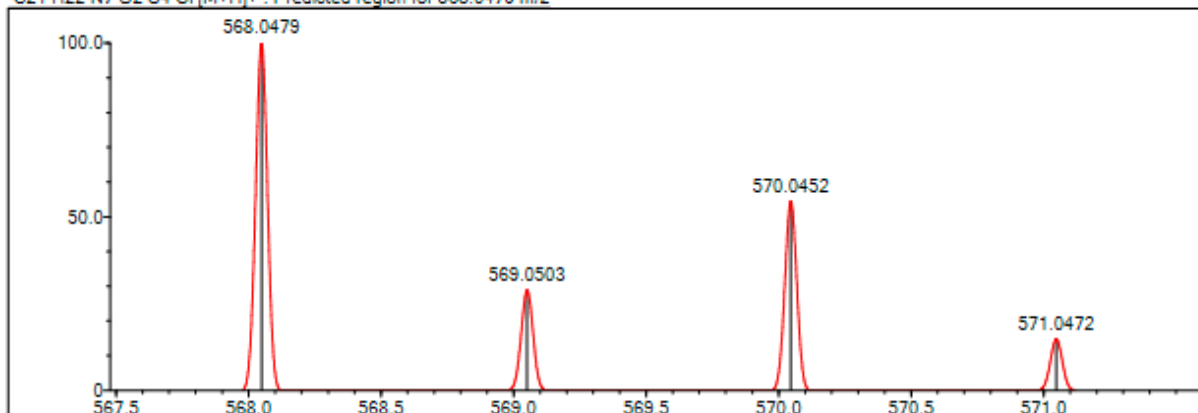

| Rank | Score | Formula (M)         | Ion                | Meas. m/z | Pred. m/z | Df. (mDa) | Df. (ppm) | Iso   | DBE  |
|------|-------|---------------------|--------------------|-----------|-----------|-----------|-----------|-------|------|
| 1    | 63.17 | C21 H22 N7 O2 S4 Cl | [M+H] <sup>+</sup> | 568.0469  | 568.0479  | -1.0      | -1.76     | 64.40 | 14.0 |

Figure 62. Compound 6p Mass spectrum



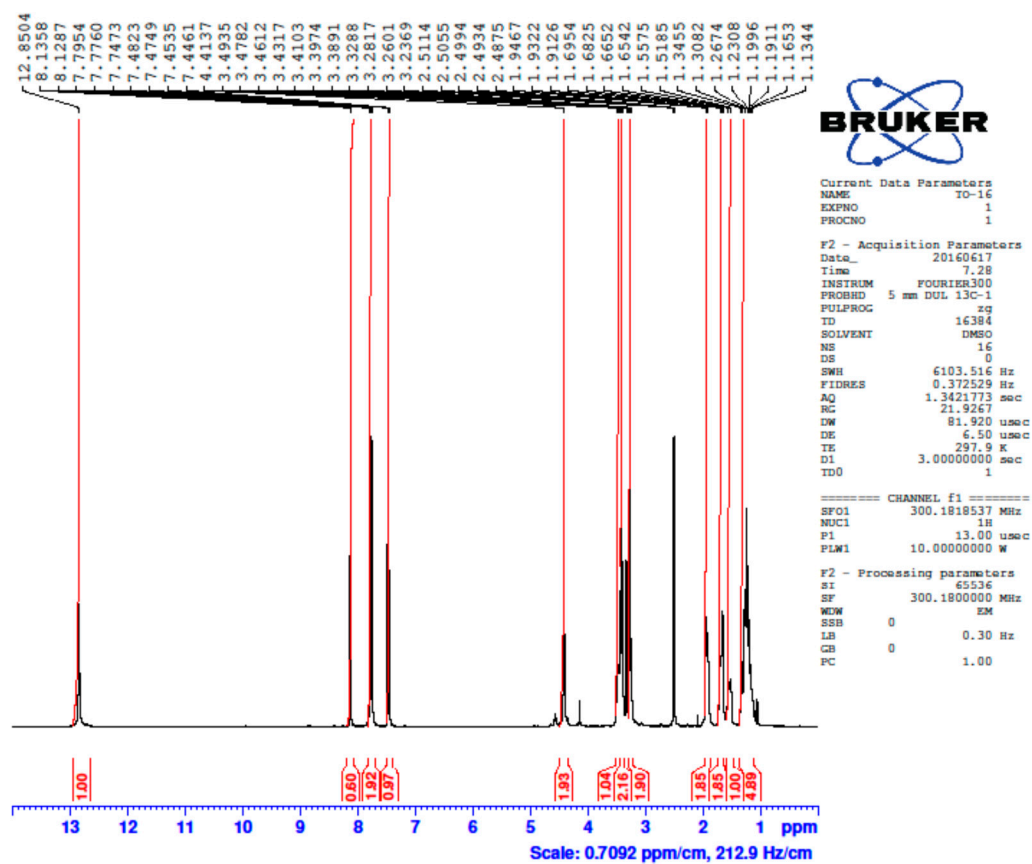

Figure 63. Compound 6p  $^1\text{H}$  NMR spectrum

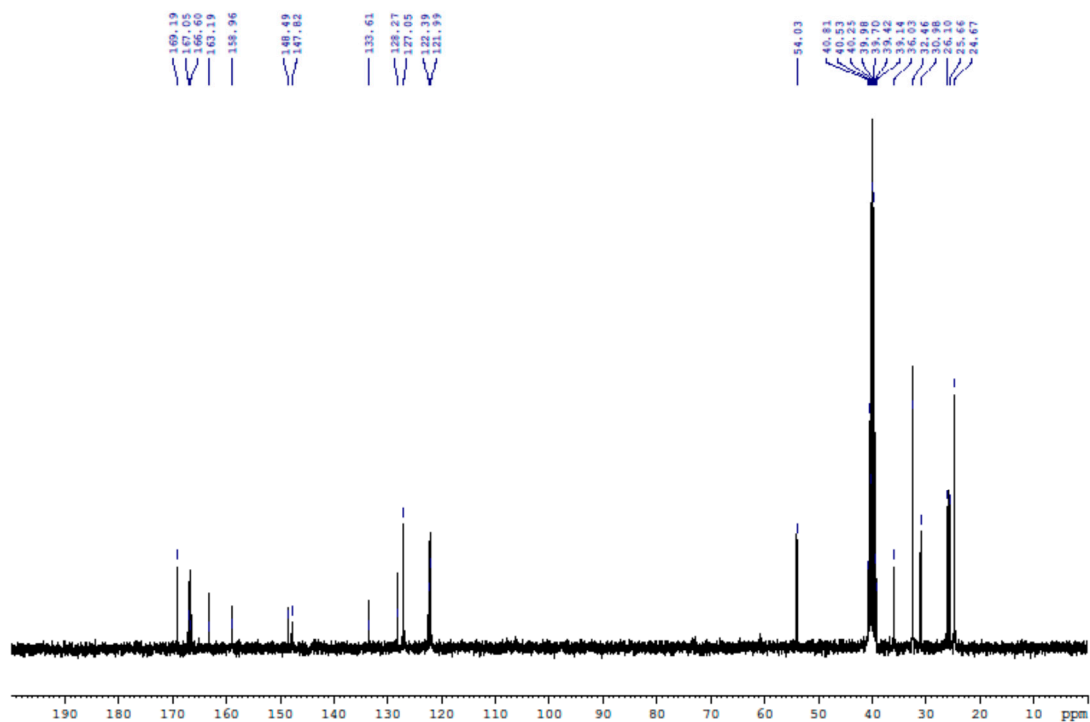

Figure 64. Compound 6p  $^{13}\text{C}$  NMR spectrum

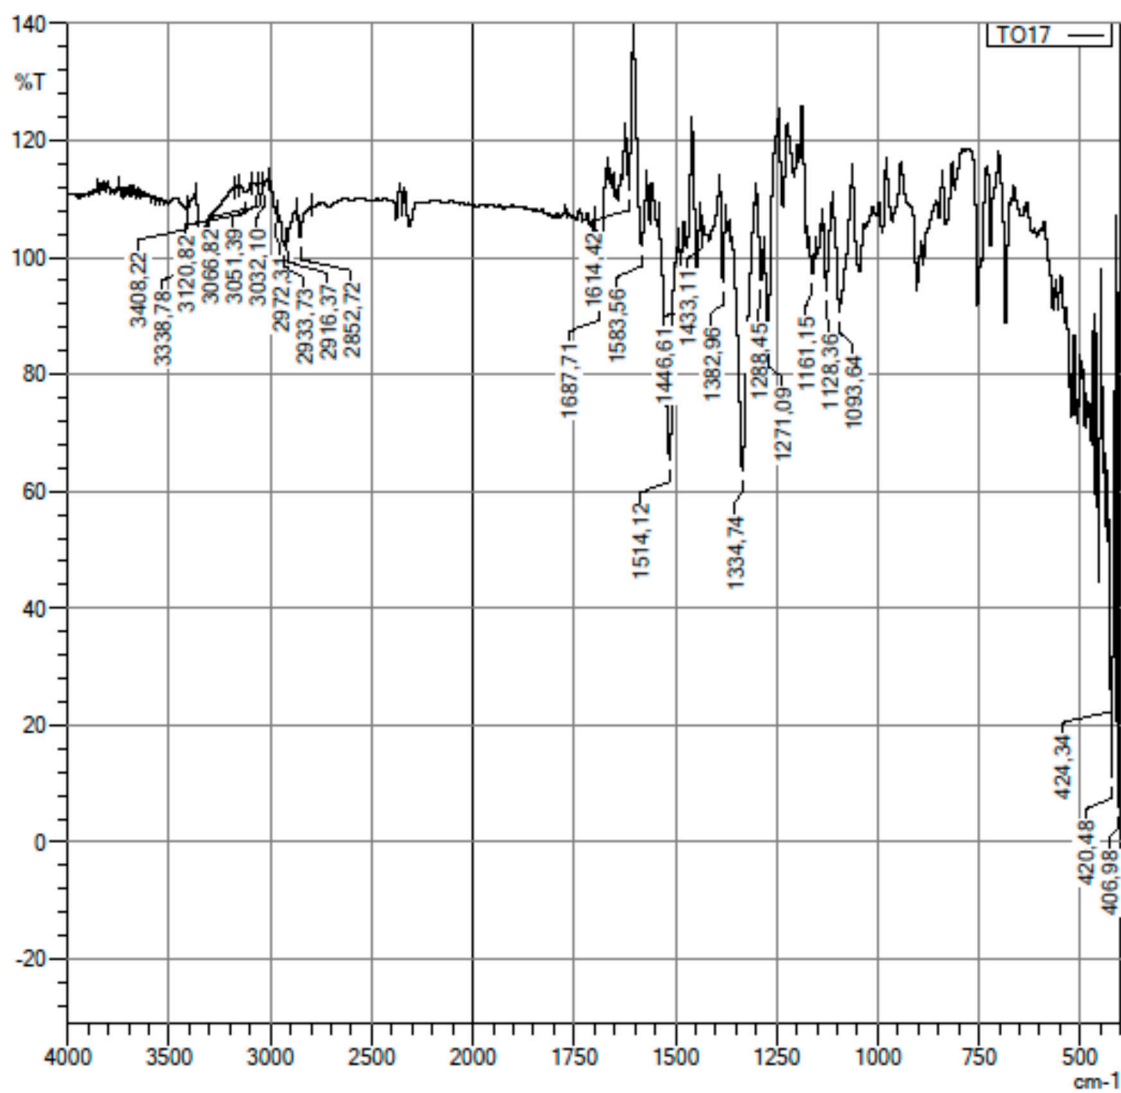

C:\Users\dopnalab\Desktop\BET7L\TOW\TO17.ispd

|   | Item           | Value           |
|---|----------------|-----------------|
| 2 | Sample name    | TO-17           |
| 3 | Sample ID      |                 |
| 4 | Option         |                 |
| 5 | Intensity Mode | % Transmittance |
| 6 | Apodization    | Happ-Genzel     |
| 9 | No. of Scans   | 10              |

Figure 65. Compound 6r IR spectrum

Data File: C:\LabSolutions\Data\Analiz\BKaya\TO17\_19.lcd

| Elmt | Val. | Min | Max | Elmt | Val. | Min | Max | Elmt | Val. | Min | Max | Use Adduct |
|------|------|-----|-----|------|------|-----|-----|------|------|-----|-----|------------|
| H    | 1    | 10  | 40  | O    | 2    | 4   | 5   | Cl   | 1    | 0   | 1   | H          |
| C    | 4    | 10  | 26  | F    | 1    | 0   | 0   | Br   | 1    | 0   | 0   |            |
| N    | 3    | 8   | 8   | S    | 2    | 4   | 4   |      |      |     |     |            |

|                       |                       |                     |
|-----------------------|-----------------------|---------------------|
| Error Margin (ppm): 5 | DBE Range: 9.0 - 19.0 | Electron Ions: both |
| HC Ratio: unlimited   | Apply N Rule: yes     | Use MSn Info: no    |
| Max Isotopes: 3       | Isotope RI (%): 1.00  | Isotope Res: 10000  |
| MSn Iso RI (%): 10.00 | MSn Logic Mode: AND   | Max Results: 500    |

Event#: 1 MS(E+) Ret. Time : 8.920 -> 8.960 Scan#: 1339 -> 1345

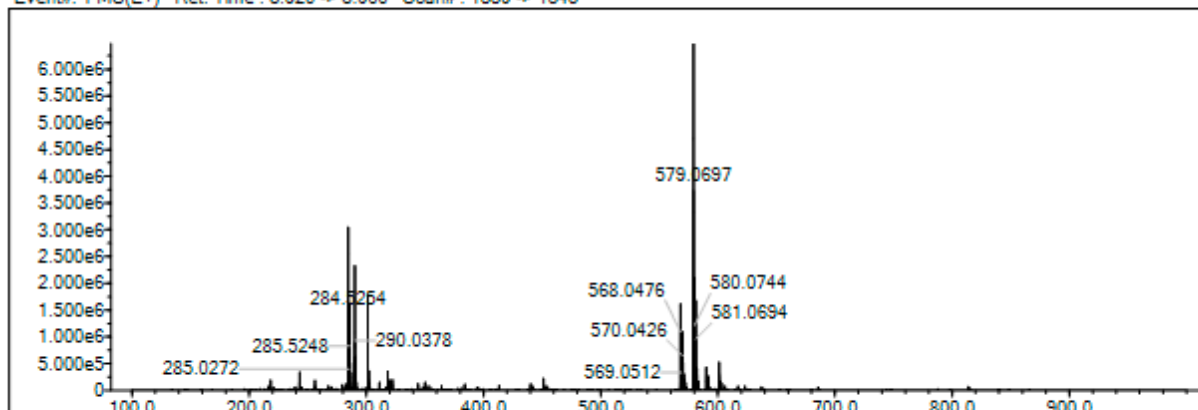

Measured region for 579.0697 m/z

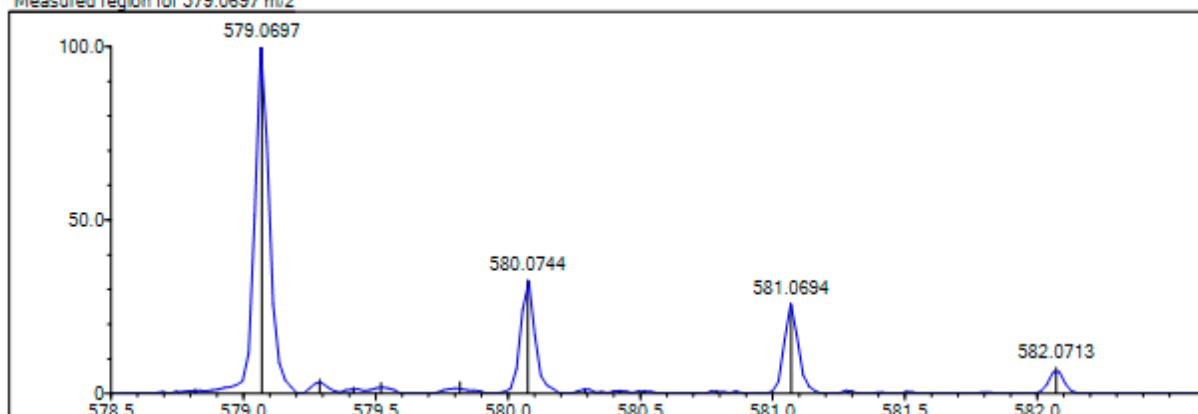

C21 H22 N8 O4 S4 [M+H]+ : Predicted region for 579.0720 m/z

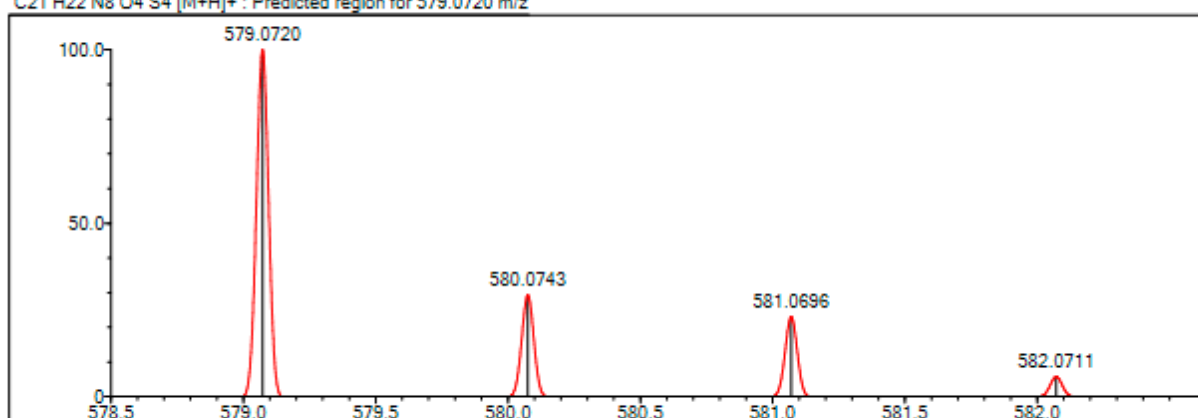

| Rank | Score | Formula (M)      | Ion    | Meas. m/z | Pred. m/z | Df. (mDa) | Df. (ppm) | Iso   | DBE  |
|------|-------|------------------|--------|-----------|-----------|-----------|-----------|-------|------|
| 1    | 78.85 | C21 H22 N8 O4 S4 | [M+H]+ | 579.0697  | 579.0720  | -2.3      | -3.97     | 85.17 | 15.0 |

Figure 66. Compound 6r Mass spectrum

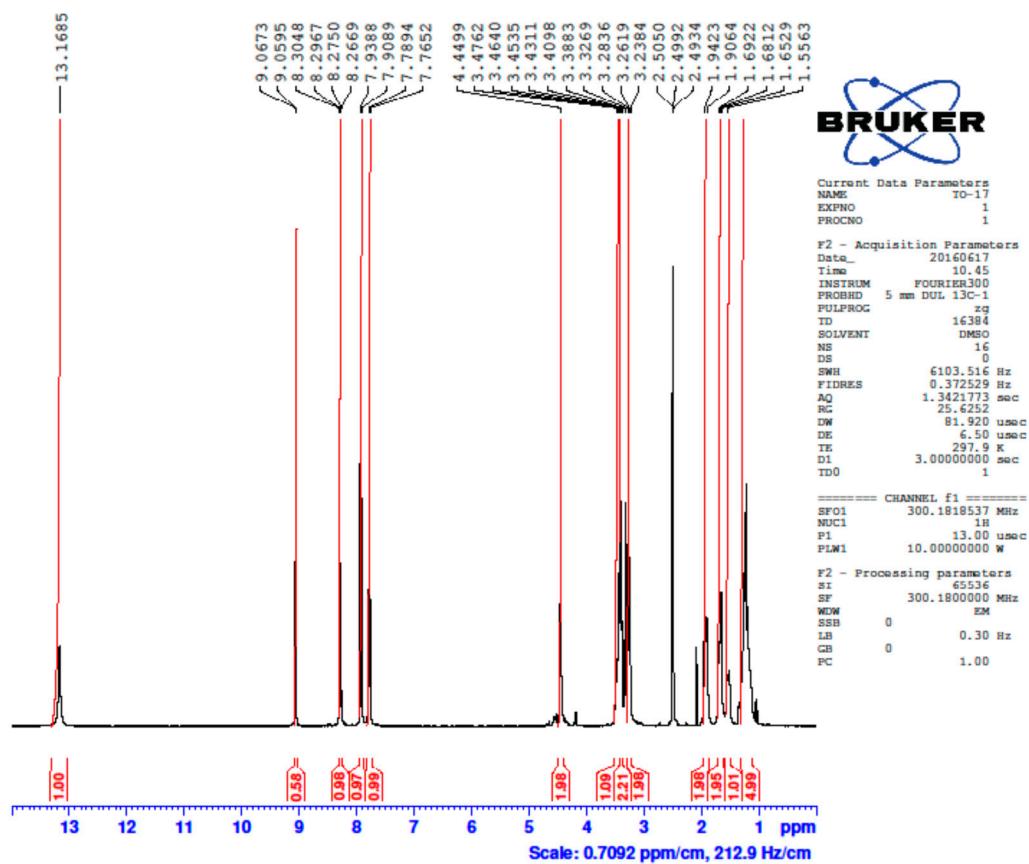

Figure 67. Compound 6r <sup>1</sup>H NMR spectrum

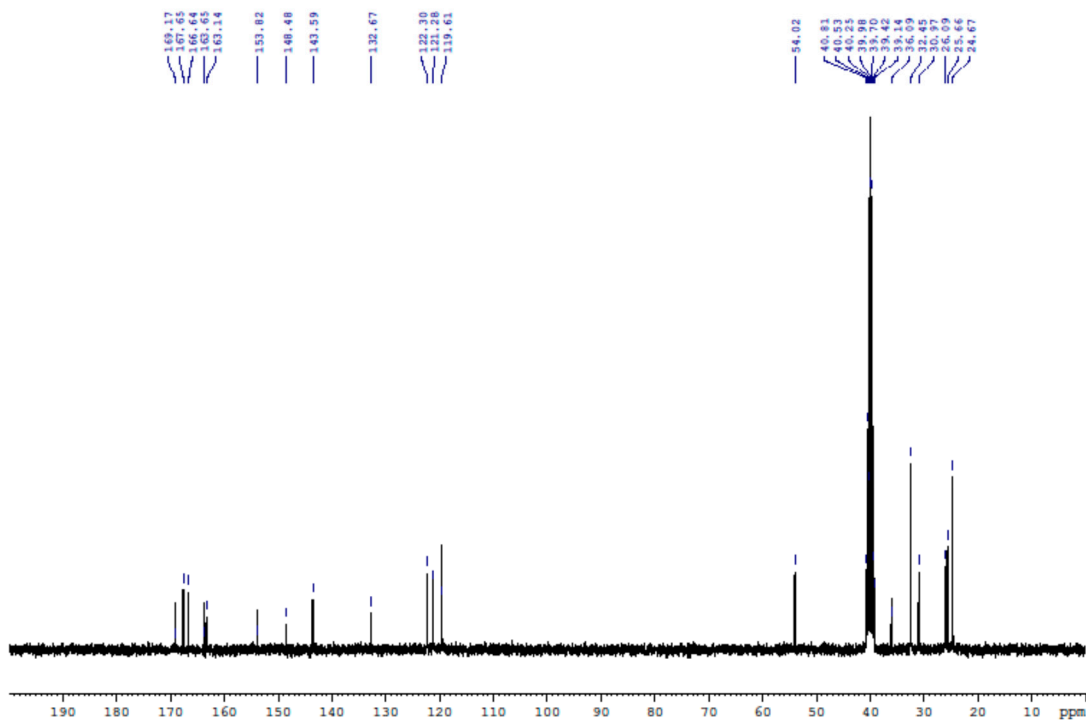

Figure 68. Compound 6r <sup>13</sup>C NMR spectrum

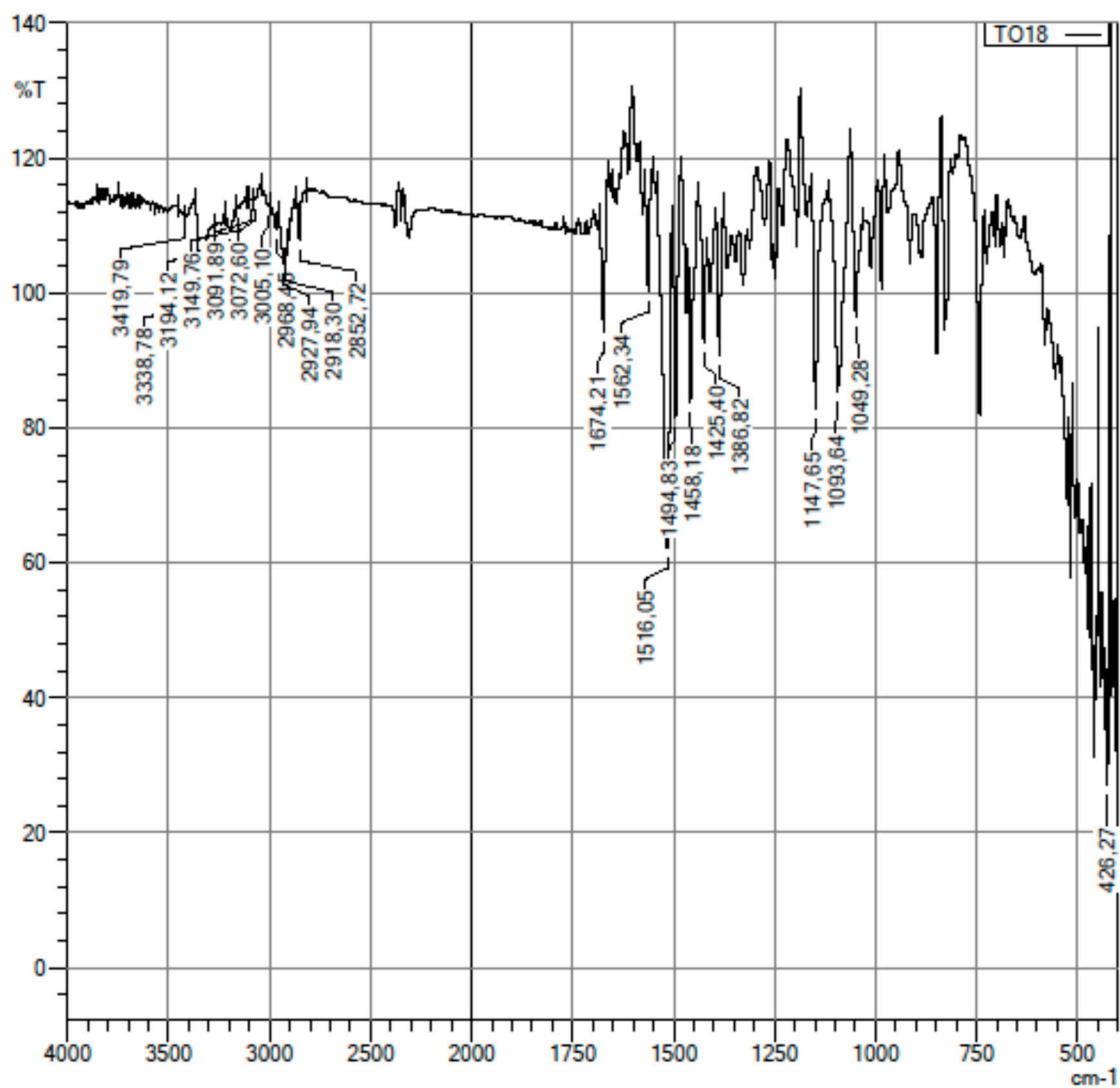

C:\Users\dopnlab\Desktop\BET7\LV\TO\TO18.ispd

|   | Item           | Value           |
|---|----------------|-----------------|
| 2 | Sample name    | TO-18           |
| 3 | Sample ID      |                 |
| 4 | Option         |                 |
| 5 | Intensity Mode | % Transmittance |
| 6 | Apodization    | Happ-Genzel     |
| 9 | No. of Scans   | 10              |

Figure 69. Compound 6s IR spectrum

Data File: C:\LabSolutions\Data\Analiz\BKaya\TO18\_20.lcd

| Elmt | Val. | Min | Max | Elmt | Val. | Min | Max | Elmt | Val. | Min | Max | Use Adduct |
|------|------|-----|-----|------|------|-----|-----|------|------|-----|-----|------------|
| H    | 1    | 10  | 40  | O    | 2    | 2   | 5   | Cl   | 1    | 0   | 1   | H          |
| C    | 4    | 10  | 26  | F    | 1    | 1   | 1   | Br   | 1    | 0   | 0   |            |
| N    | 3    | 7   | 8   | S    | 2    | 4   | 4   |      |      |     |     |            |

Error Margin (ppm): 5  
 HC Ratio: unlimited  
 Max Isotopes: 3  
 MSn Iso RI (%): 10.00

DBE Range: 9.0 - 19.0  
 Apply N Rule: yes  
 Isotope RI (%): 1.00  
 MSn Logic Mode: AND

Electron Ions: both  
 Use MSn Info: no  
 Isotope Res: 10000  
 Max Results: 500

Event#: 1 MS(E+) Ret. Time : 7.867 -> 7.973 Scan#: 1181 -> 1197

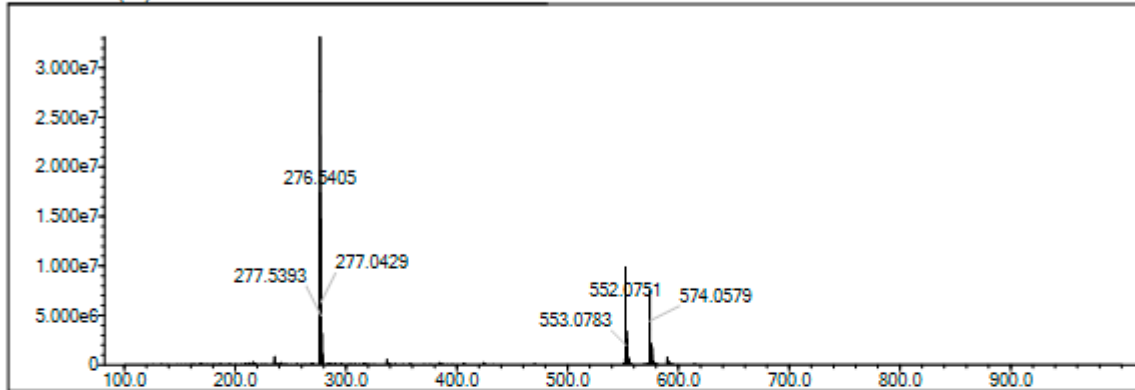

Measured region for 552.0751 m/z

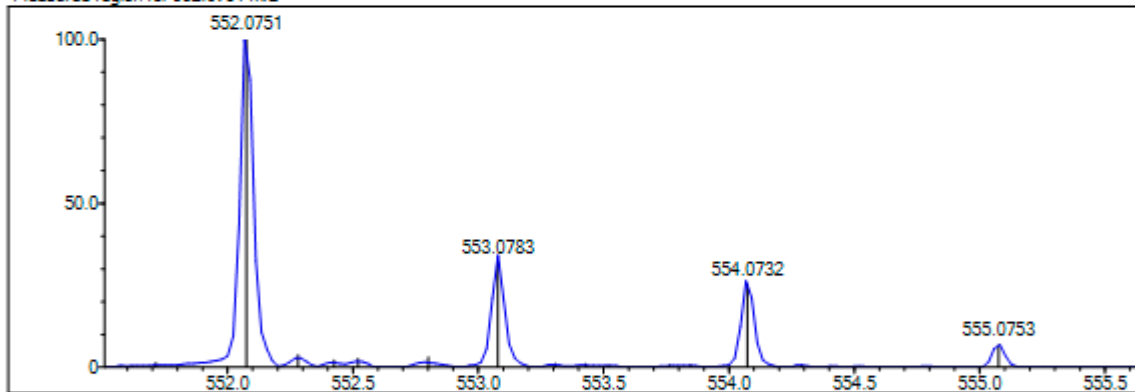

C21 H22 N7 O2 F S4 [M+H]+ : Predicted region for 552.0775 m/z

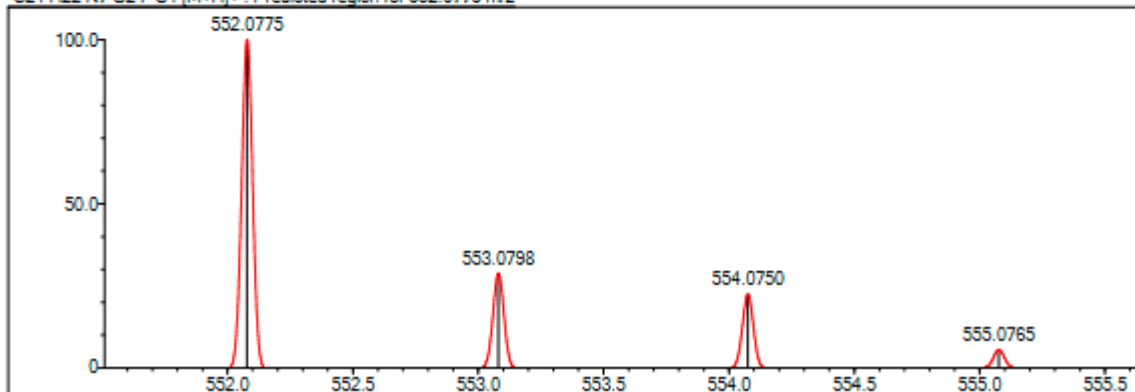

| Rank | Score | Formula (M)        | Ion                | Meas. m/z | Pred. m/z | Df. (mDa) | Df. (ppm) | Iso   | DBE  |
|------|-------|--------------------|--------------------|-----------|-----------|-----------|-----------|-------|------|
| 1    | 79.36 | C21 H22 N7 O2 F S4 | [M+H] <sup>+</sup> | 552.0751  | 552.0775  | -2.4      | -4.35     | 86.62 | 14.0 |

Figure 70. Compound 6s Mass spectrum

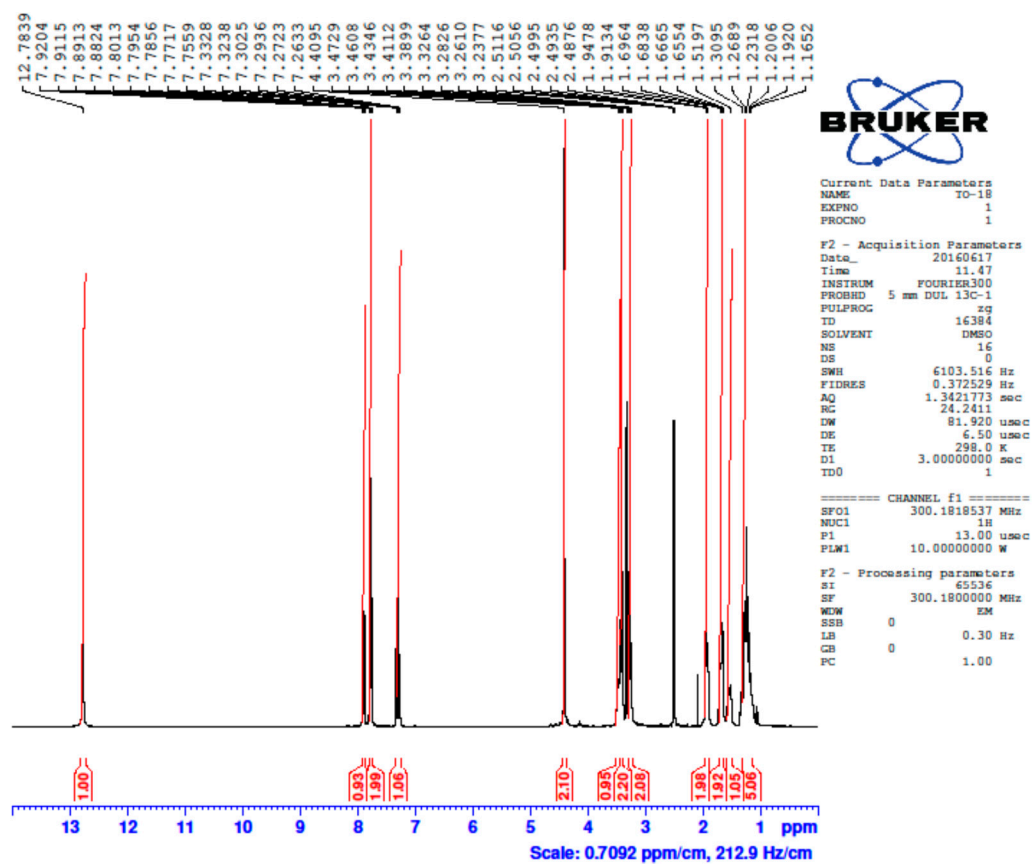

Figure 71. Compound 6s  $^1\text{H}$  NMR spectrum

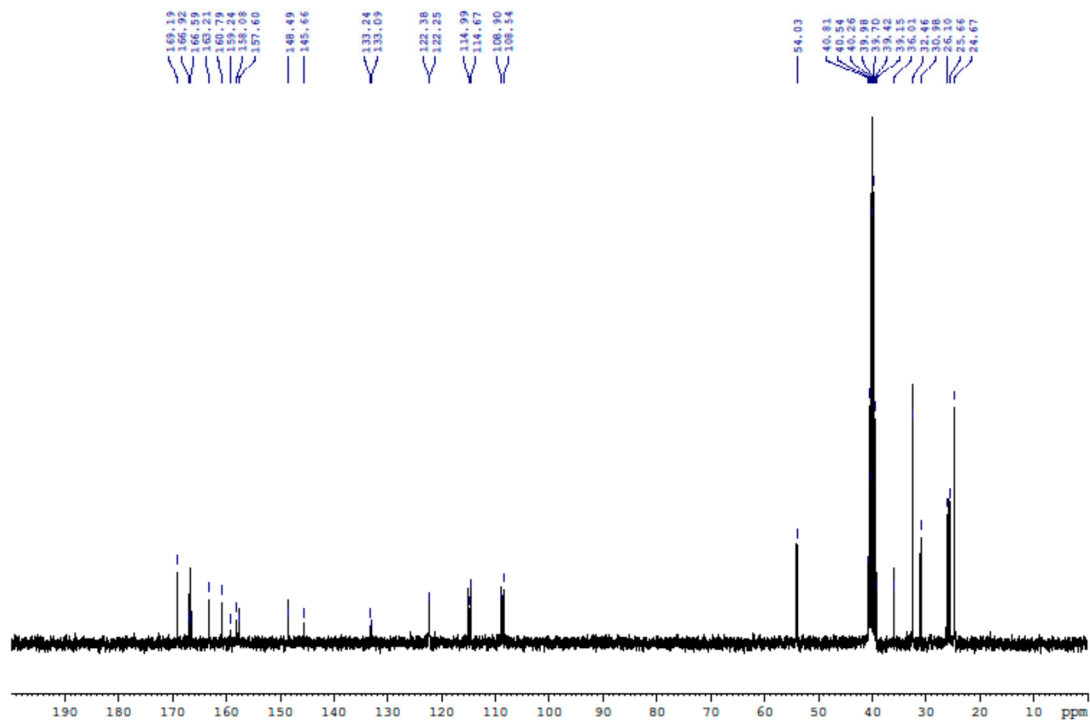

Figure 72. Compound 6s  $^{13}\text{C}$  NMR spectrum
